# Supplementary material for: Rationally Designed Transgene-Encoded Cell-Surface Polypeptide Tag for Multiplexed Programming of CAR T-cell Synthetic Outputs
Source: Oxford University Press journal article supplement (doi:10.1158/2326-6066.cir-20-0470), 2021-07-09
Supplement: 23266066cir200470-sup-244597_2_supp_7128350_qvmpmr.docx [file 23266066cir200470-sup-244597_2_supp_7128350_qvmpmr.docx]

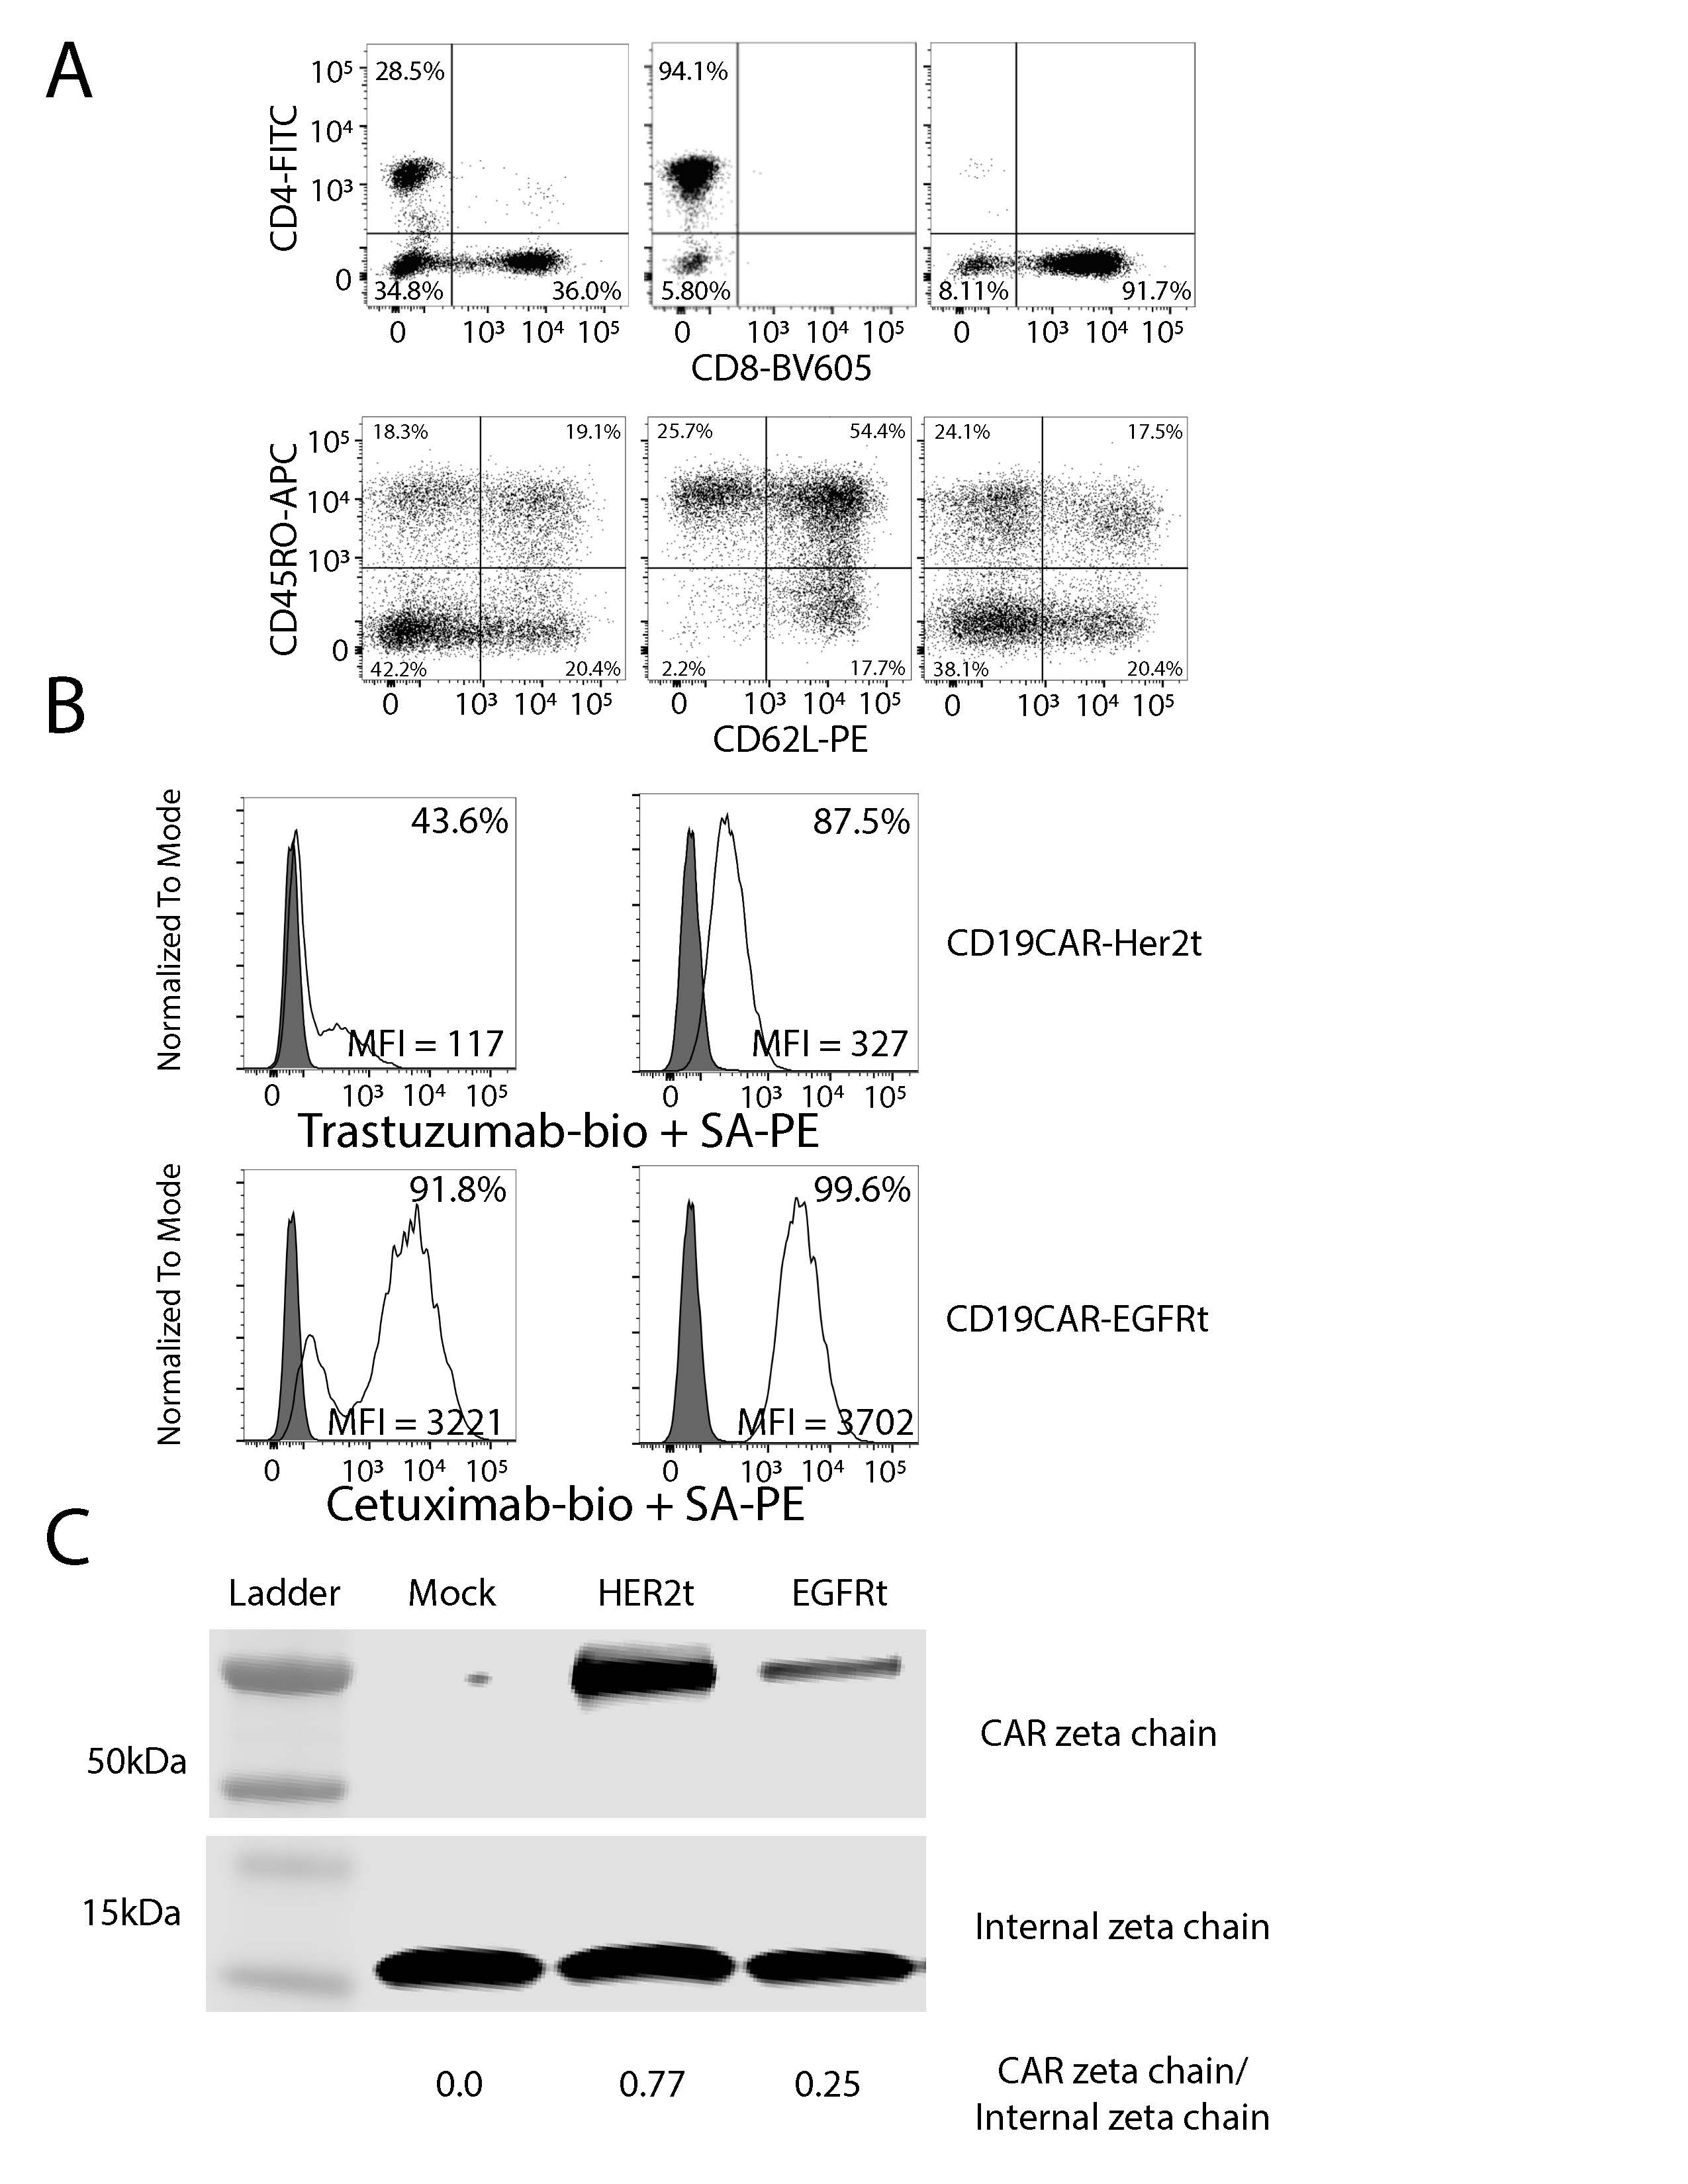


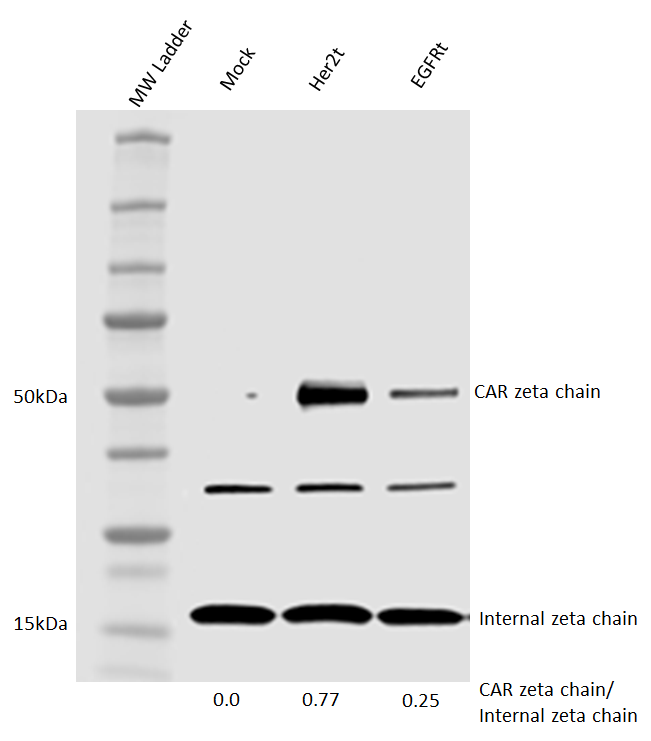


CD19CAR-HER2t

**Supplemental Figure S1. Immunomagnetic selection of primary T-cells transduced with HER2t- and EGFRt-containing CD19 CAR constructs.** (A) Purification of CD4+ and CD8+ T cells from PBMC using anti CD4 or CD8 microbeads (Miltenyi), respectively (top). Representative phenotypic analysis of T cell memory markers CD45RO and CD62L in purified CD4+ and CD8+ subsets (bottom). (B) Marker positivity of CD4+ T cells pre- and post-selection using biotinylated trastuzumab (HER2t) or cetuximab (EGFRt) and anti-biotin microbeads. (C) CD3ζ western blot analysis on cell lysates of HER2t- or EGFRt-purified CD19CAR-expressing CD4+ T cells. Data in figure from a representative donor of two separate donors.

**Supplemental Figure S2. Western blot analyses.** (A) Full western blots for figure 2C (B) supplemental figure 1C.

A


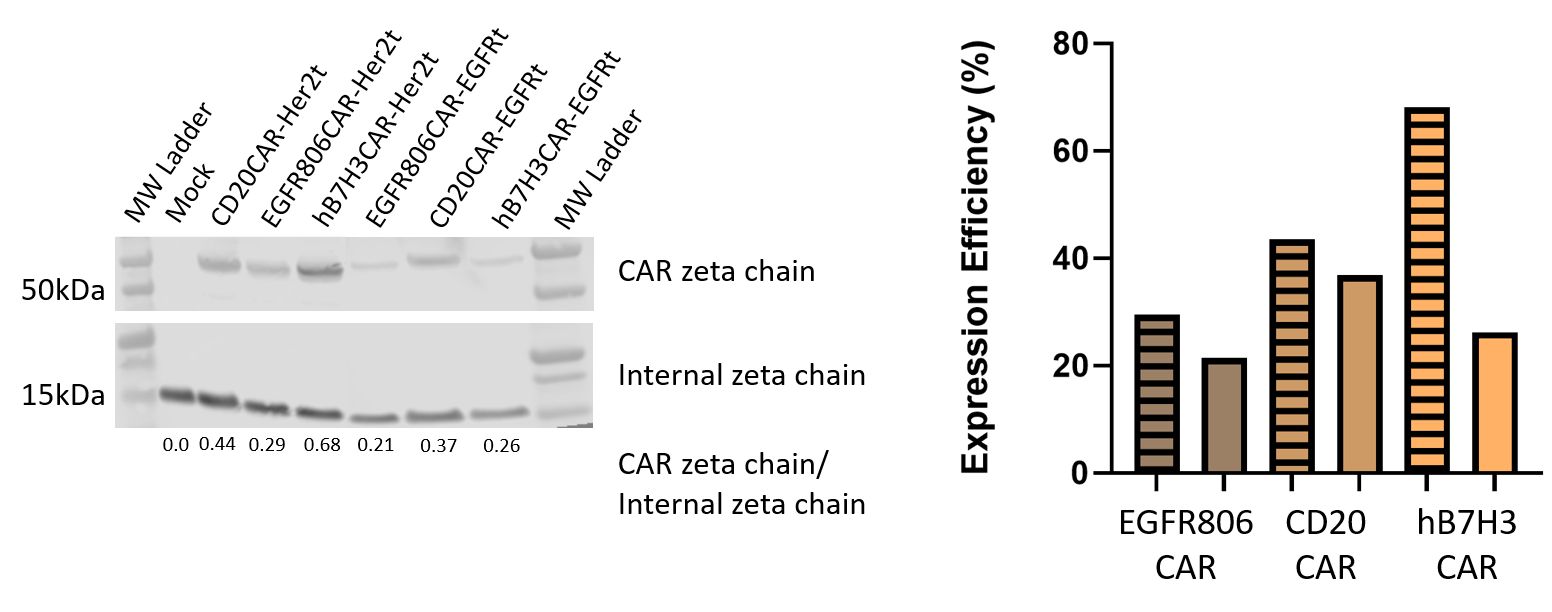


B

C


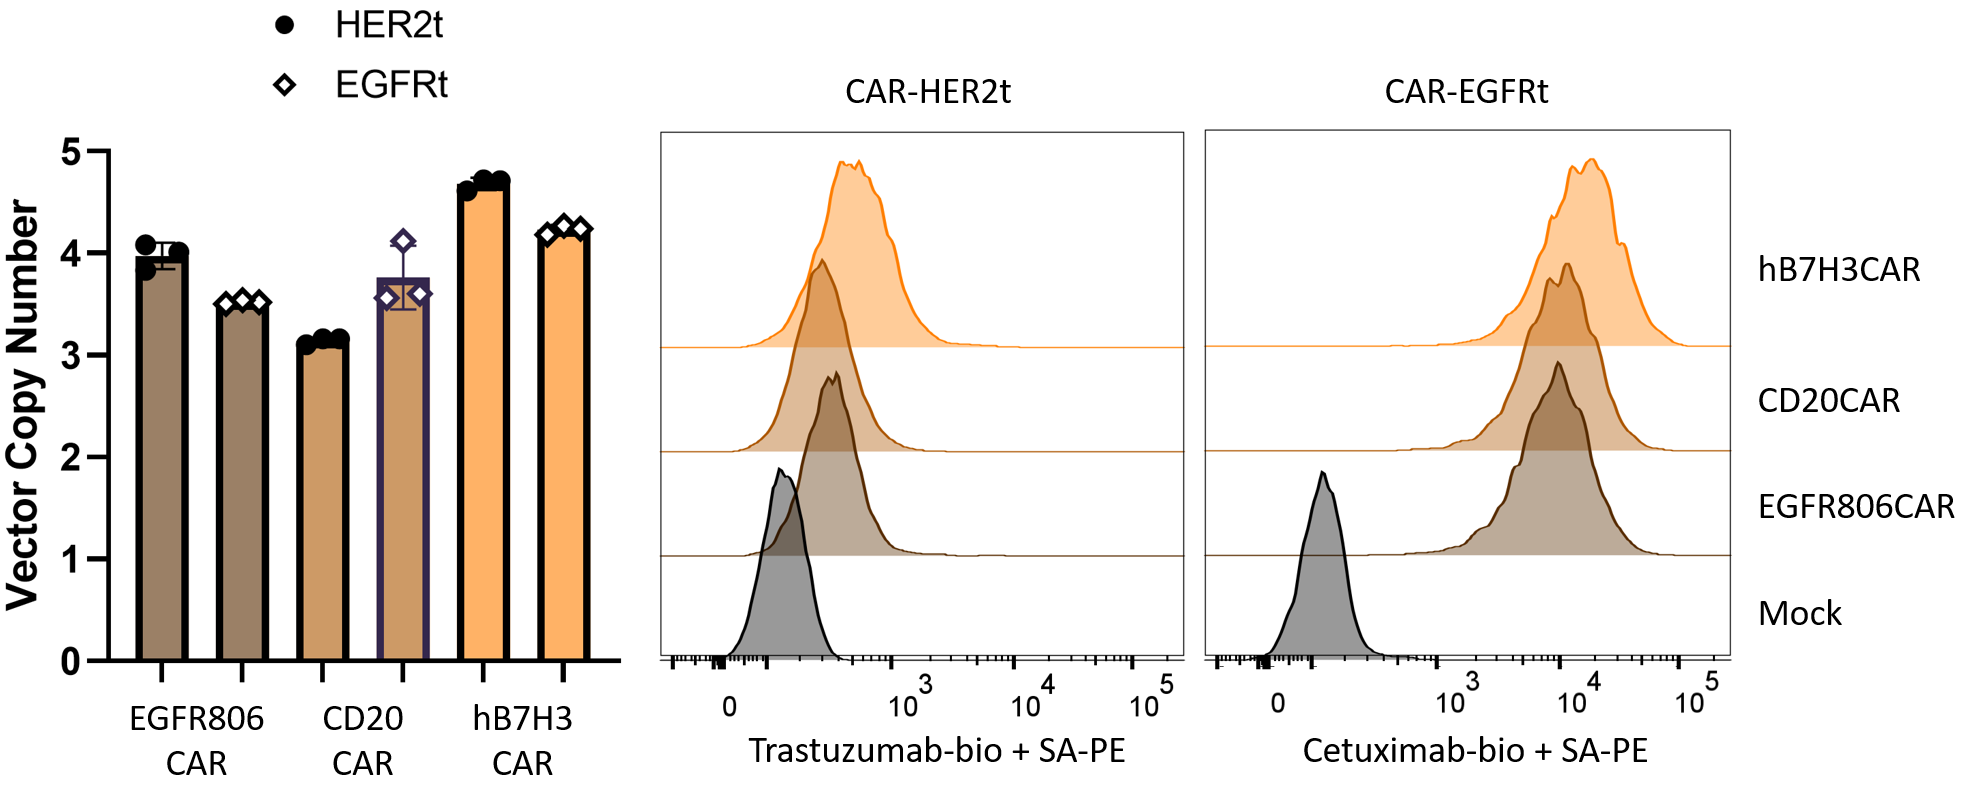


**Supplemental Figure S3.** **Immmunomagnetic selection of** **EGFRt-selected CD20CAR, EGFR806CAR, and hB7H3CAR T cells, and vector copy analysis.** Data from H9 T cells expressing HER2t and EGFRt appended to EGFR806, CD20 and hB7H3 CARs. (A) CD3ζ western blot analysis of cell lysates of HER2t- or EGFRt-selected cells. CAR protein expression efficiency determined by normalizing the signal of the CAR zeta chain band to the signal of the internal zeta chain band. HER2t-selected cells designated by horizontal lines in bar graph. (B) Full western blot. (C) Marker positivity of H9 T cells post-selection using biotinylated trastuzumab (HER2t) or cetuximab (EGFRt) and anti-biotin microbeads.

A


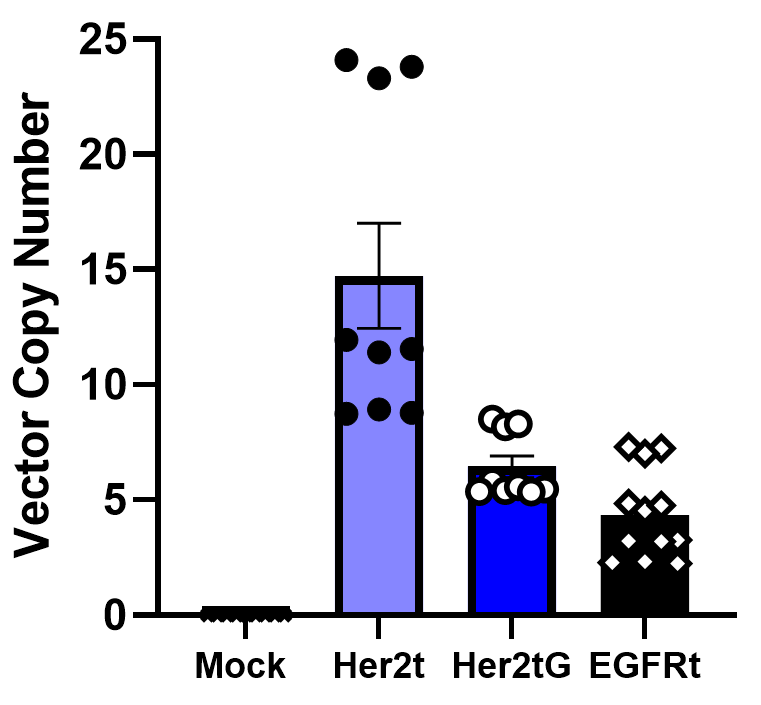

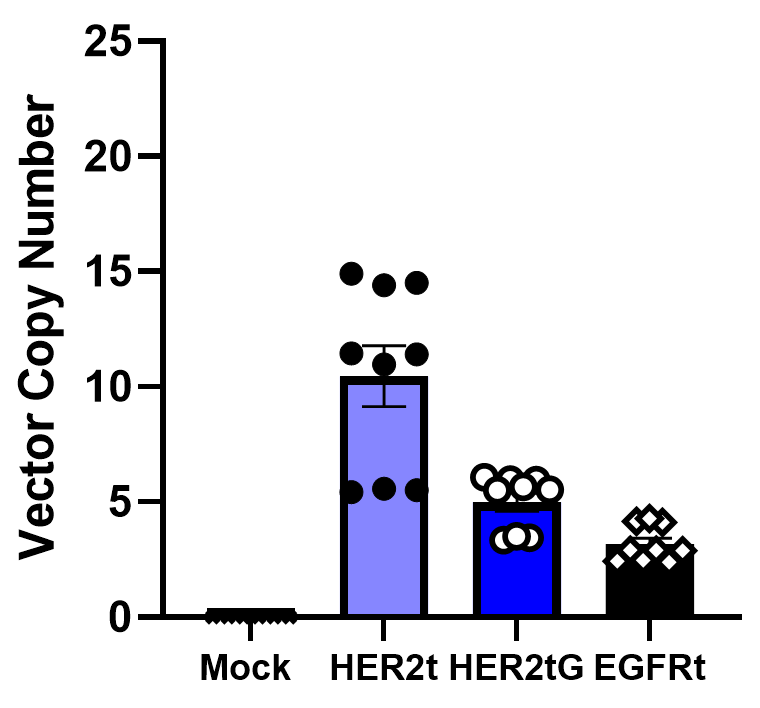


B


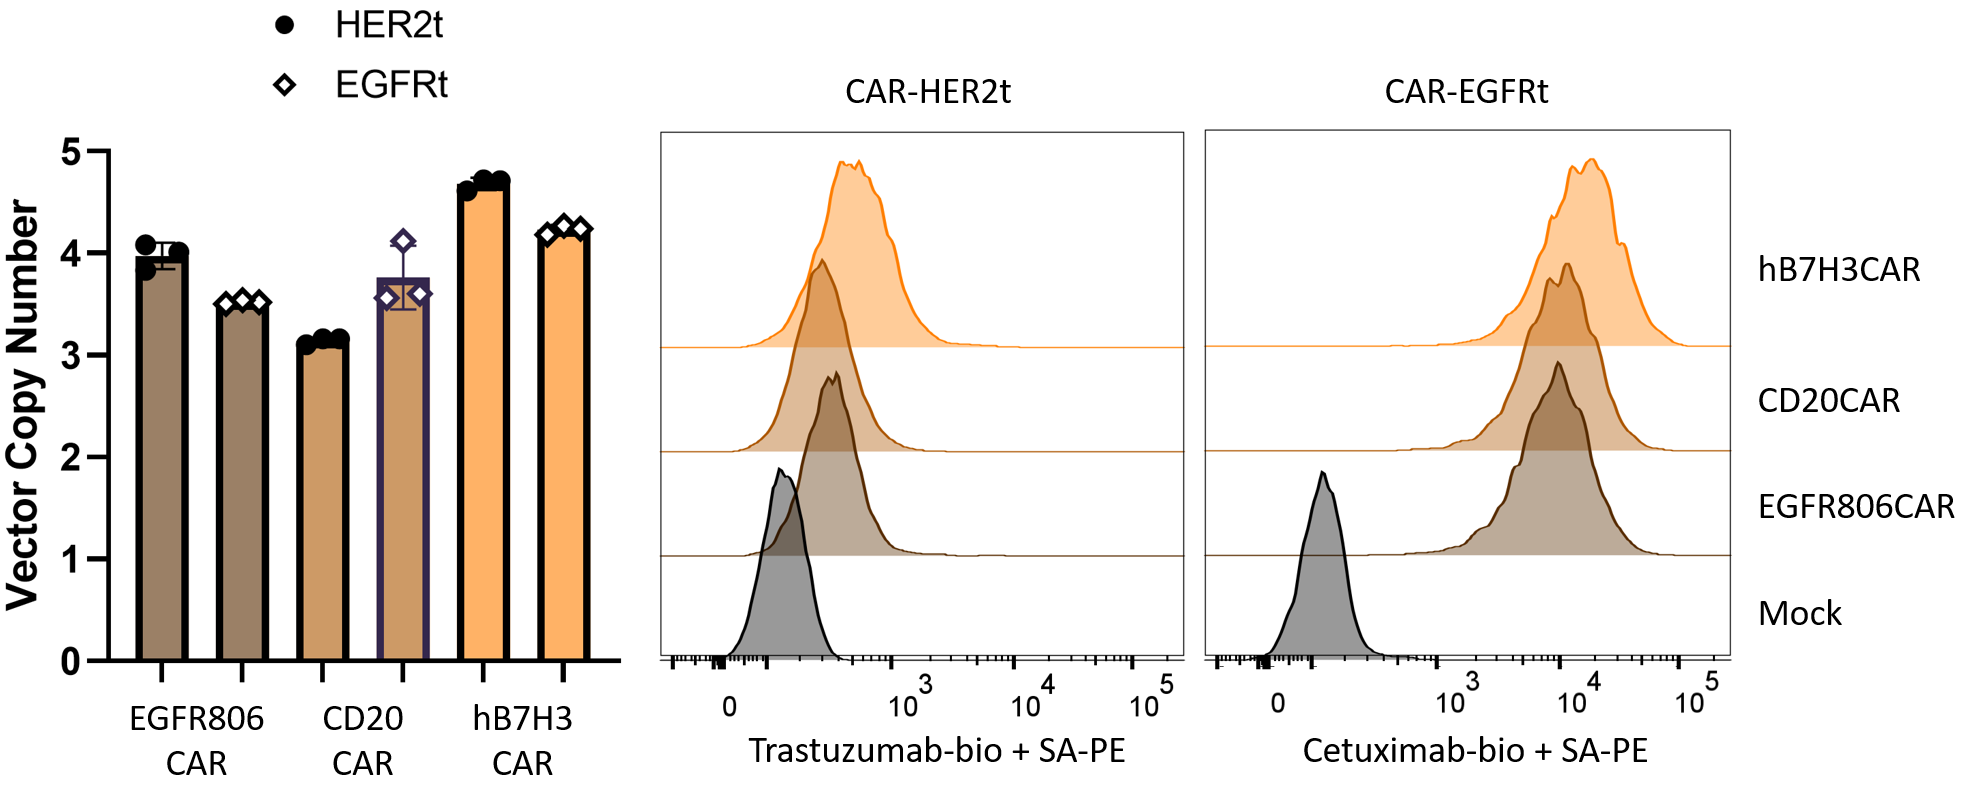


**Supplemental Figure S4.** **Vector copy analysis of primary T cells and H9 T cells expressing different CARs.** Experiments performed by ddPCR (WPRE). (A) Analysis of HER2t-, HER2tG,- or EGFRt-selected CD4+ (left) or CD8+ (right) CD19CAR T cells, as in supplemental Figure 1. Data run in triplicate from three donors. (B) Analysis of immunomagnetically selected H9 T cells expressing HER2t and EGFRt appended to EGFR806, CD20 and hB7H3 CARs, as in supplemental Figure 2, 3.


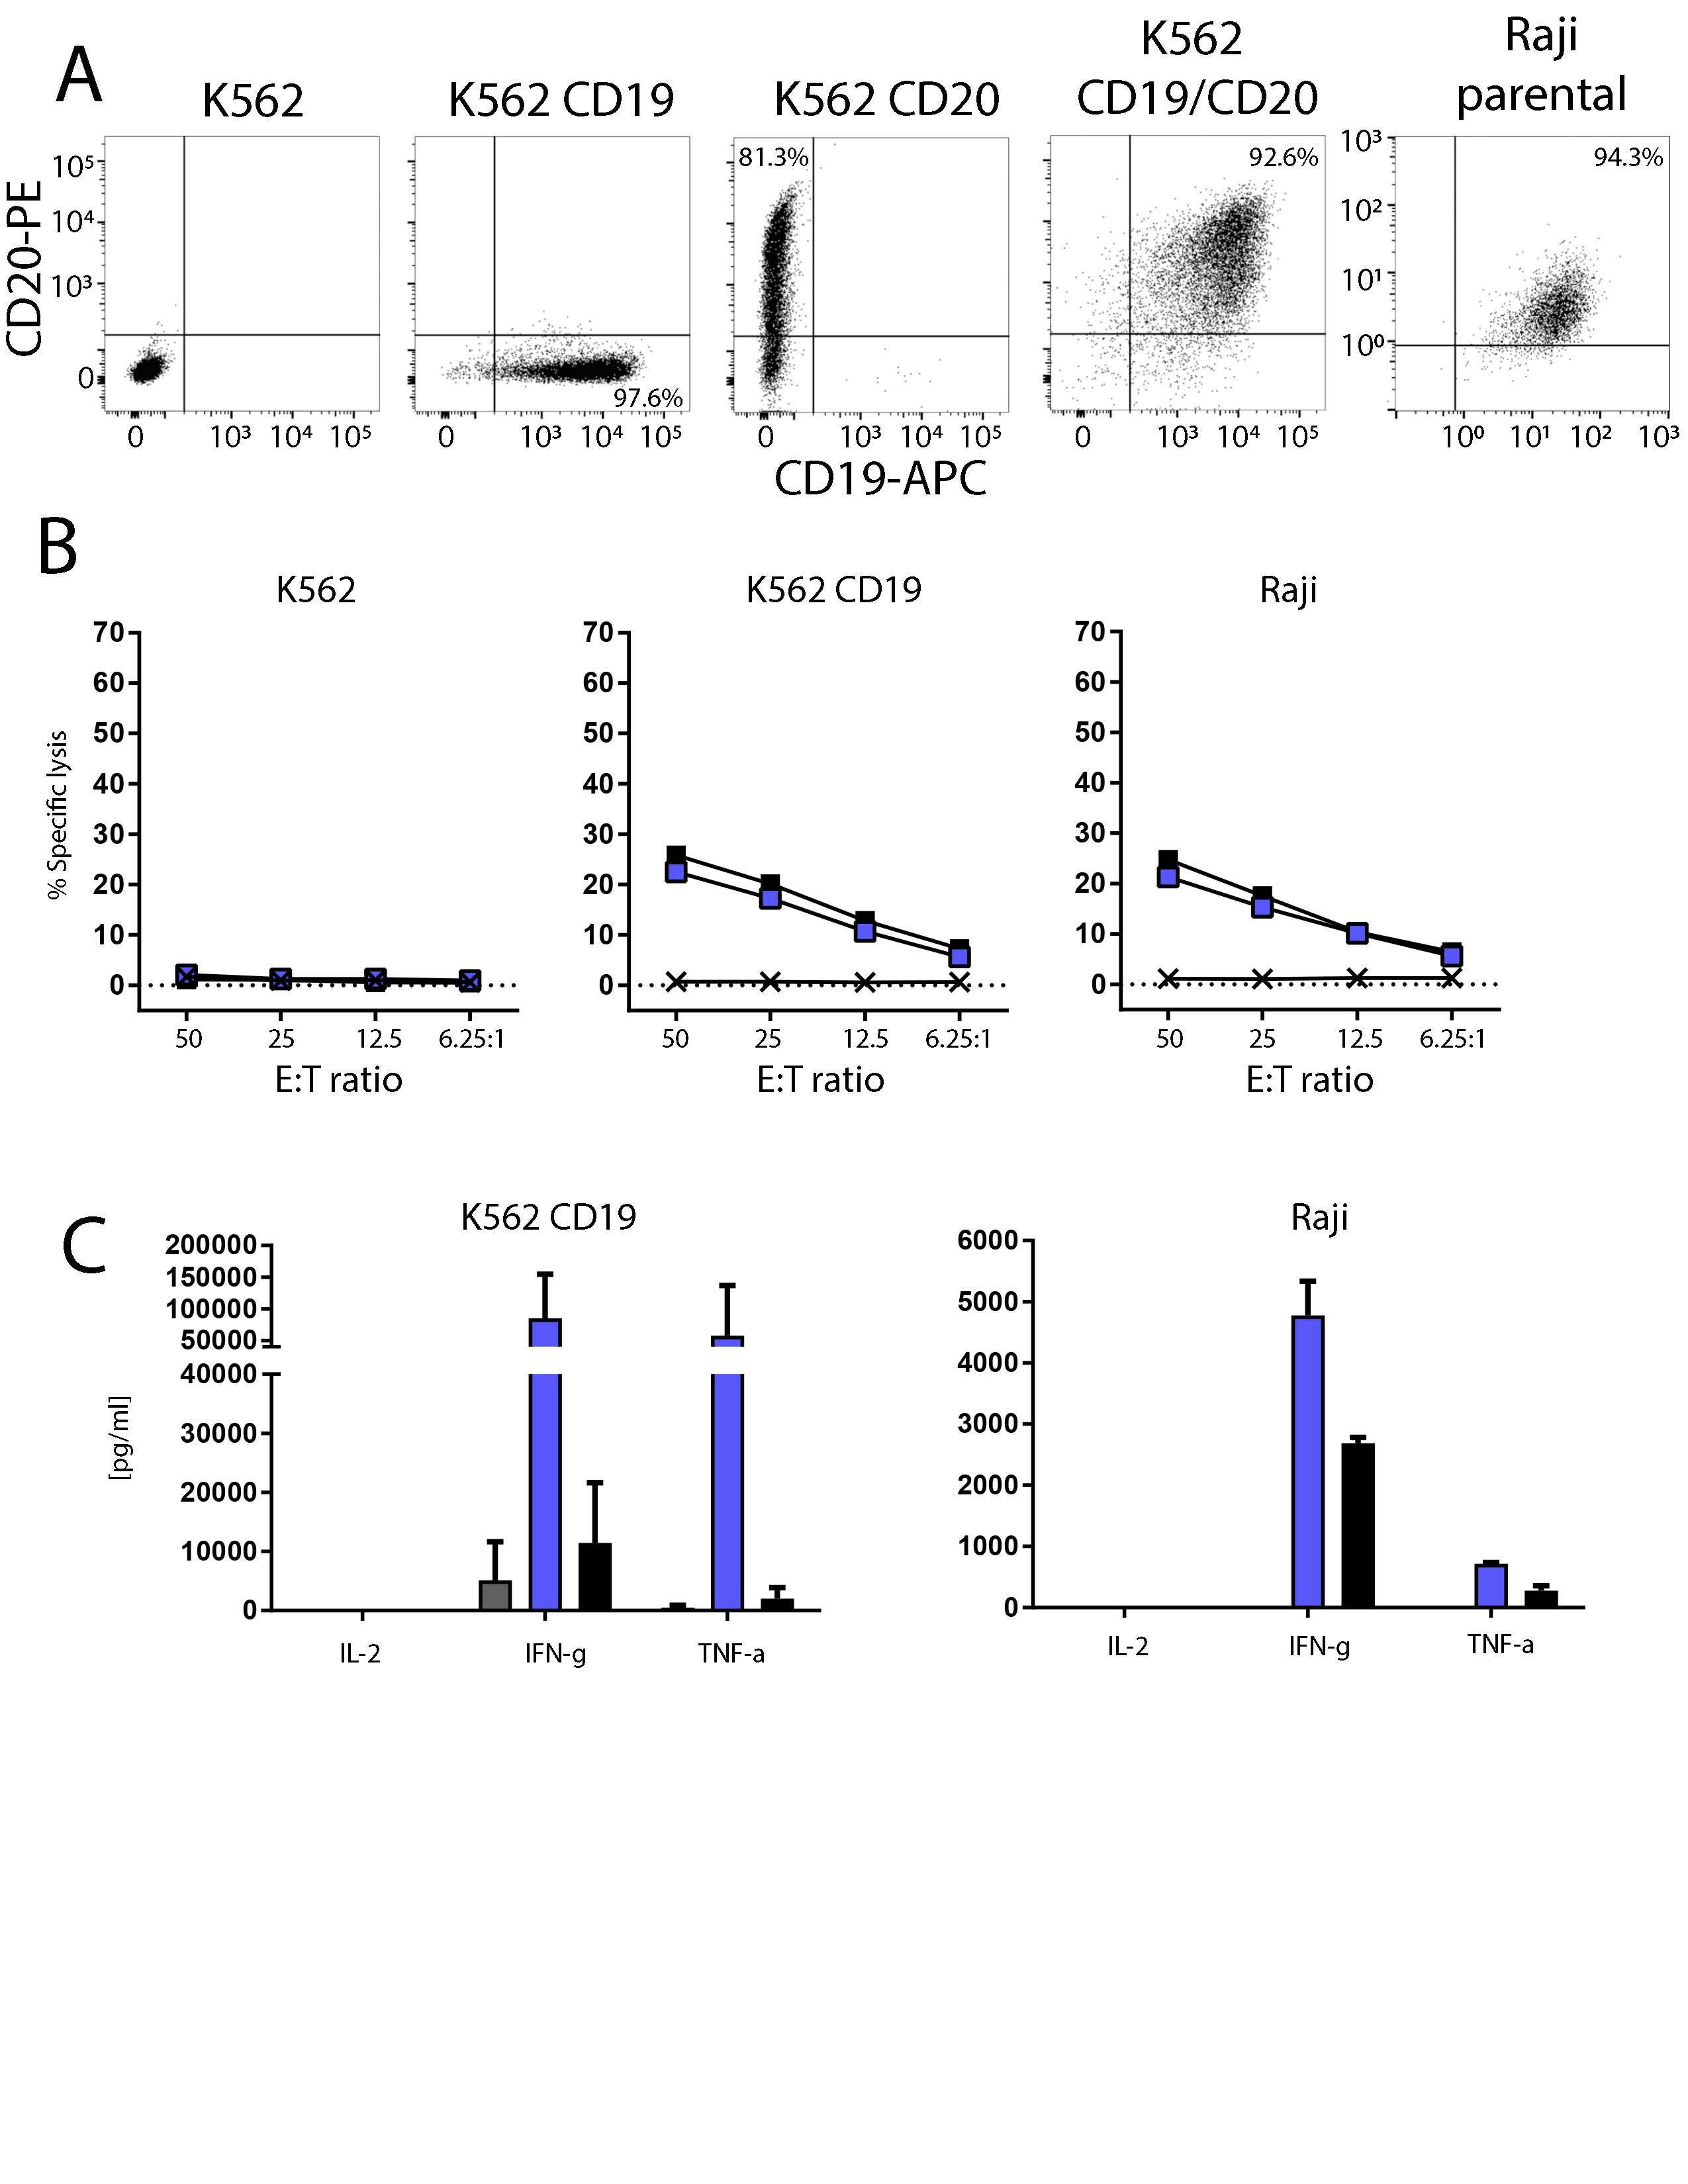


D


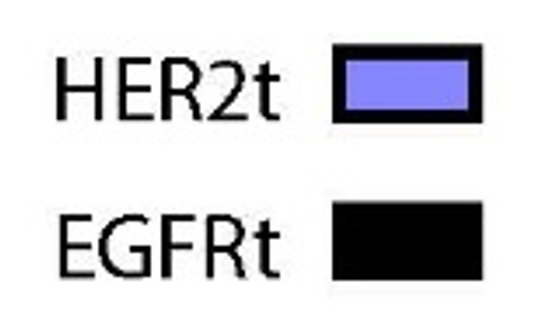


**Supplemental Figure S5.** **HER2t partners with trastuzumab to immunomagnetically enrich CD19CAR-expressing CD4+ T cells.** (A) K562 target panel left to right: K562 parental, K562 CD19, K562 CD20 and K562 CD19+CD20 and Raji Burkitt’s lymphoma cell line antigen positivity (X-axis: CD19+; Y-axis: CD20+). (B) 4hr chromium release assay showing CD19CAR T-cell specificity against target cells. CD4+ T-cells were co-cultured with target cells at a 50:1, 25:1, 12.5:1 or 6.25:1 ratio. Percentage lysis (mean ± SE) of triplicate wells is depicted. (C) 24hr cytokine release assay. CD4+ T-cells were co-cultured at a 2:1 ratio T-cell to target for 24hrs and then supernatant was analyzed for the presence of effector cytokines IL2, IFNγ, and TNFα. Assays run in triplicate and data shown as mean ± SE. Data in figure from a representative donor of two separate donors. (D) Cytokine production from CD4+ T cells cultured against Raji cells.


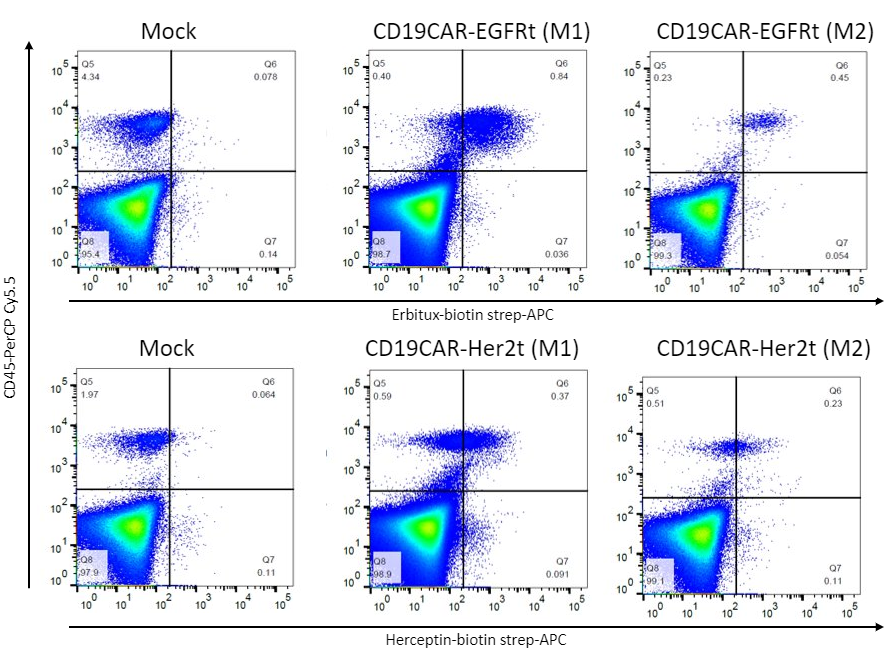


A

Cetuximab-biotin strep-APC

CD19CAR-HER2t (M2)

CD19CAR-HER2t (M1)

Trastuzumab-biotin strep-APC

B


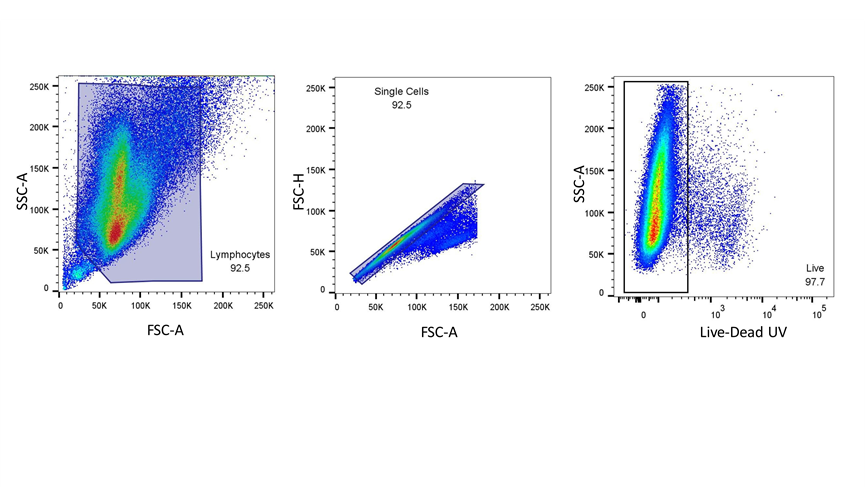


C


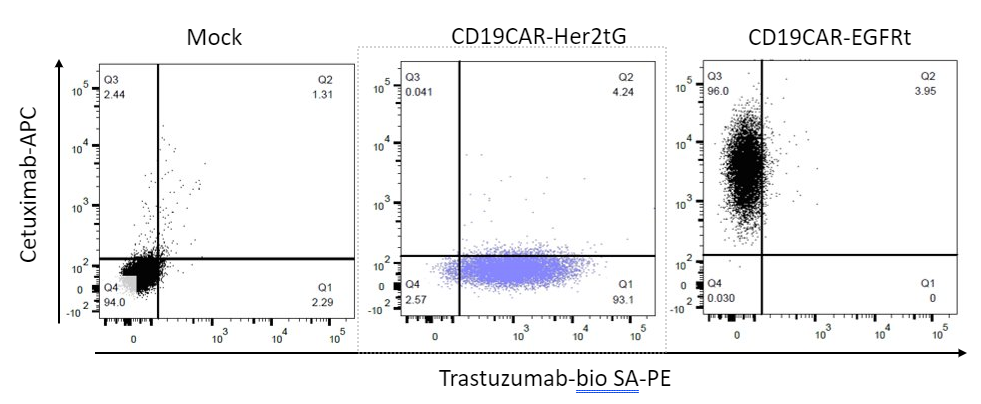


**Supplemental figure S6. HER2t is not sufficient as a complementary epitope for in vivo tracking.**

(A) Flow cytometry from NSG mouse bone marrow harvested 14 d after injection with mock or CAR T cells expressing a CD19CAR appended to EGFRt or HER2t. 15 mice total, 5 mice per group. (B) Gating strategy for (A) and Figure 5D. Single cell suspensions of harvested bone marrow were subjected to flow analysis using a LSRFortessa. Cells were initially gated by SSC-A x FSC-A then further gated into singlets by FSH-A x FSC-A. Singlets were then Live gated by SSC-A x Live-Dead UV. . (C)Flow cytometric analysis of post-sort purity from CD4+ cells transduced with CD19CAR-T2A-HER2tG or CD19CAR-T2A-EGFRt and immunomagnetically purified**.**


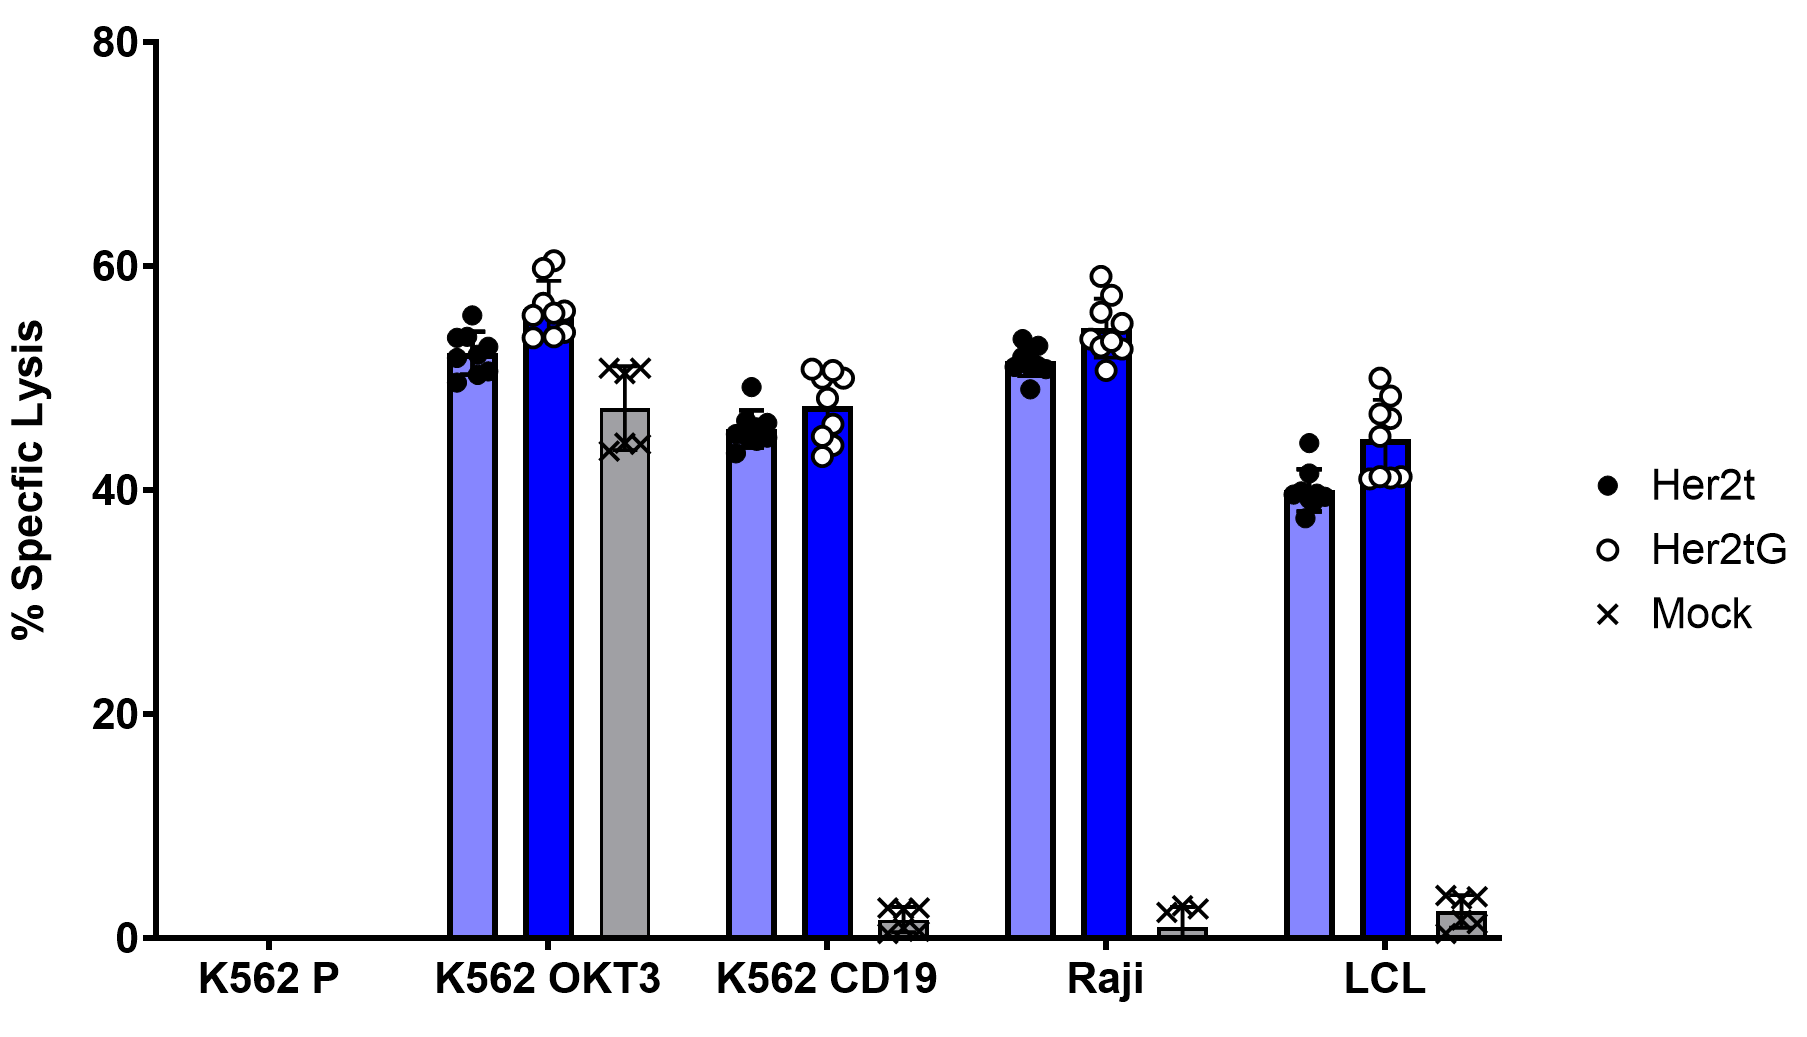


HER2t HER2tGMock

A

B


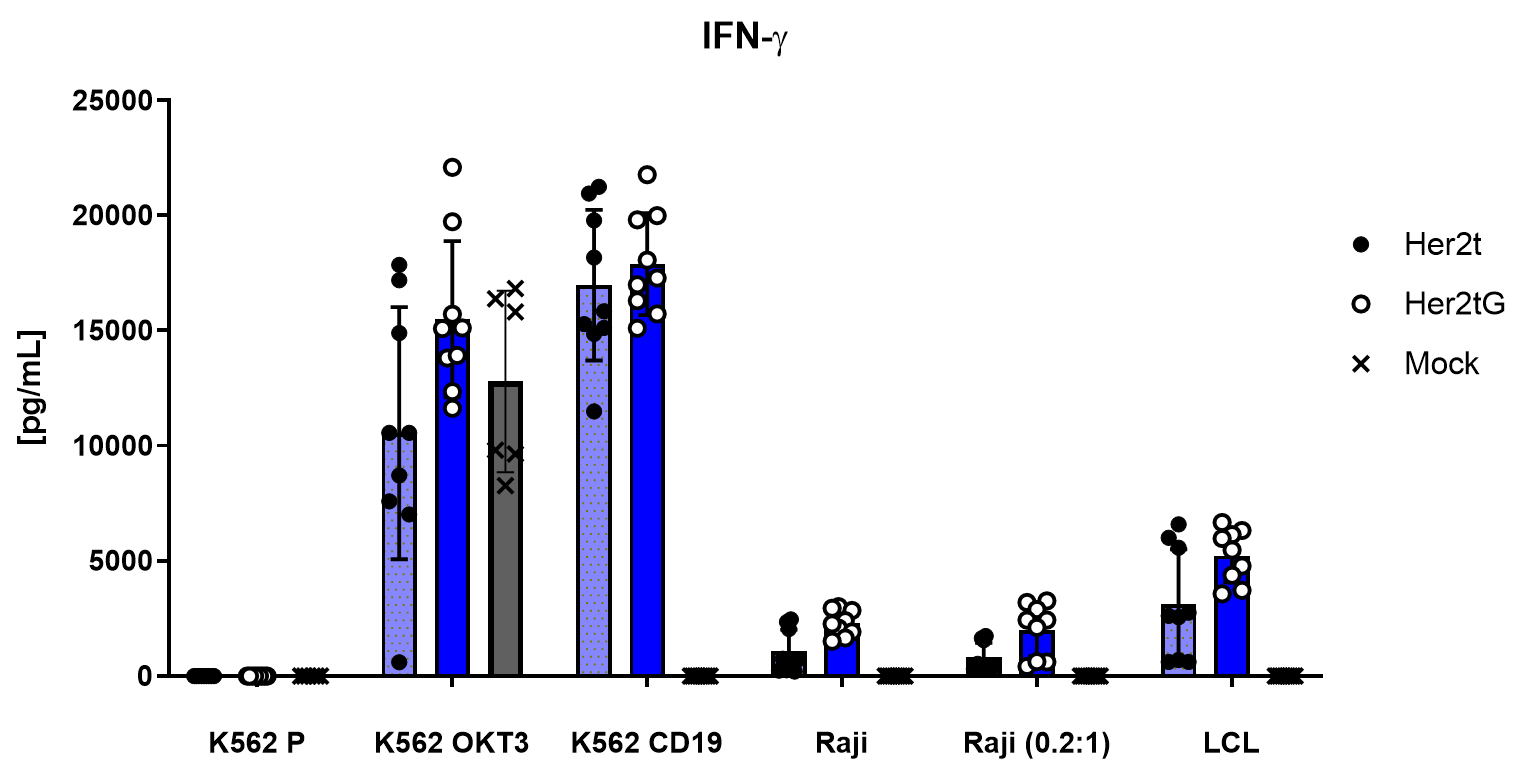


HER2t HER2tGMock

v

C


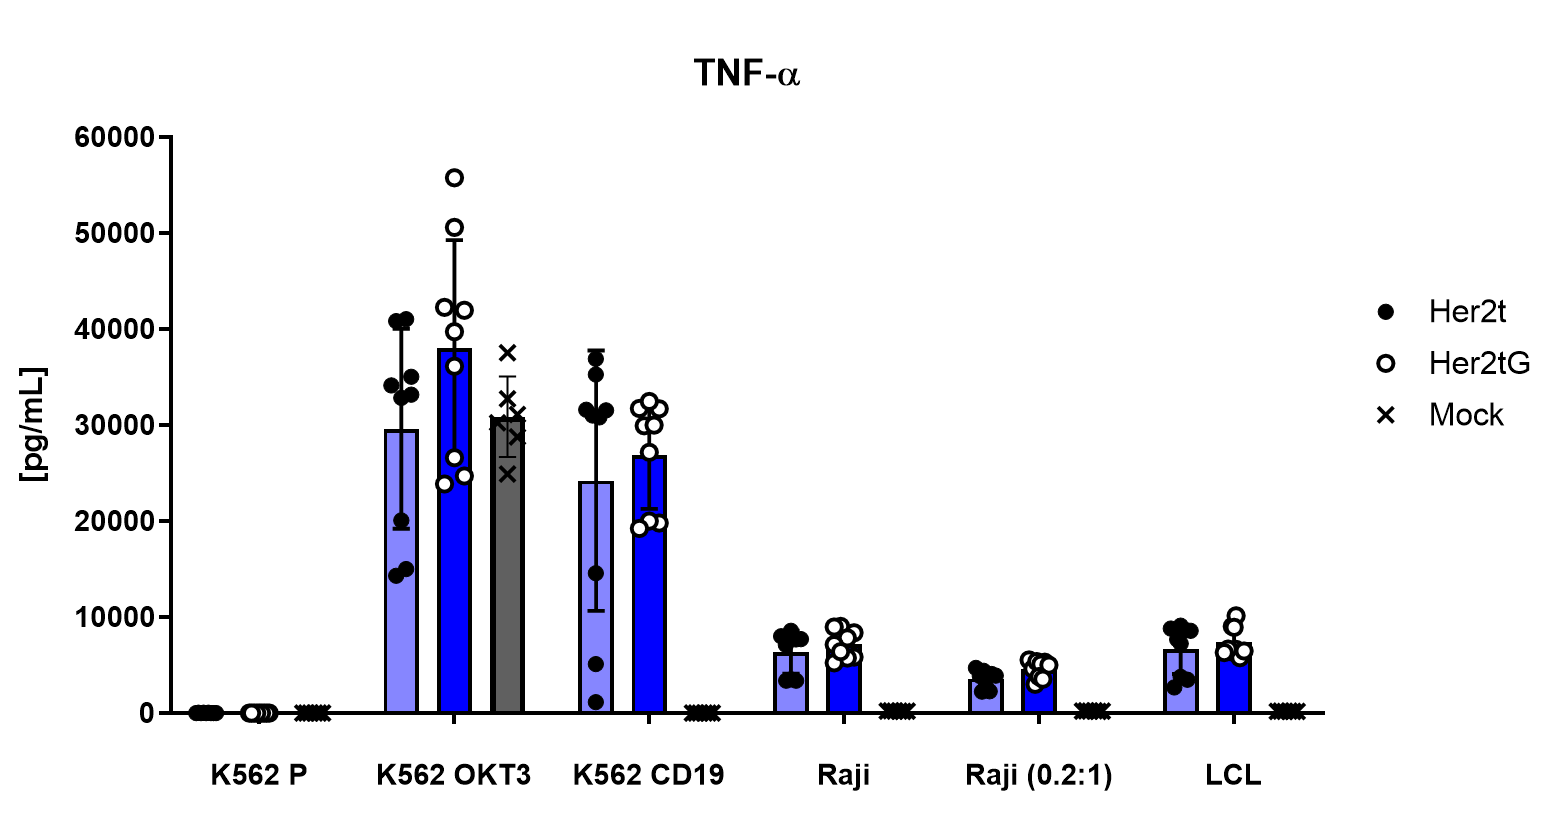


HER2t HER2tGMock

v

**Supplemental Figure S7. HER2t- and HER2tG-immunomagnetically enriched CD19CAR-expressing CD8+ T-cells demonstrate similar in vitro cytotoxicity and cytokine production.** (A) 4hr chromium release assay showing CD19CAR T-cell specificity against target cells. CD8+ T cells were co-cultured with target cells at a 30:1, 10:1, 3:1 or 1:1 ratio. Percentage lysis (mean ± SE) of triplicate wells from three separate donors at the 10:1 ratio is depicted. (B, C) 24hr cytokine release assay. CD8+ T cells were co-cultured at a 2:1 ratio of T cell to target for 24hrs and then supernatant was analyzed for the presence of effector cytokines IFNγ and TNFα. Assay run in triplicate using three separate donors and data shown as mean ± SE.

**Supplemental Figure S8. Additional Western blot analyses.** (A) Full western blot for figure 4D. (B) Western blot analysis using a CD3ζ specific antibody on cell lysates of HER2tG or EGFRt purified CD4+ T cells. Upper bands = CD19CAR; Lower bands = endogenous CD3ζ

**Supplemental Figure S9.** HER2tG is a complementary epitope for dual-targeted CD4+ T cells. Cytokine release assay of supernatants harvested 24hr post co-culture with a 2:1 CD4+ T cell:target ratio. Supernatants from triplicate wells analyzed for the presence of effector cytokines IL2, IFNg, and TNFa. Data represent two separate assays, presented as mean +/- SE.


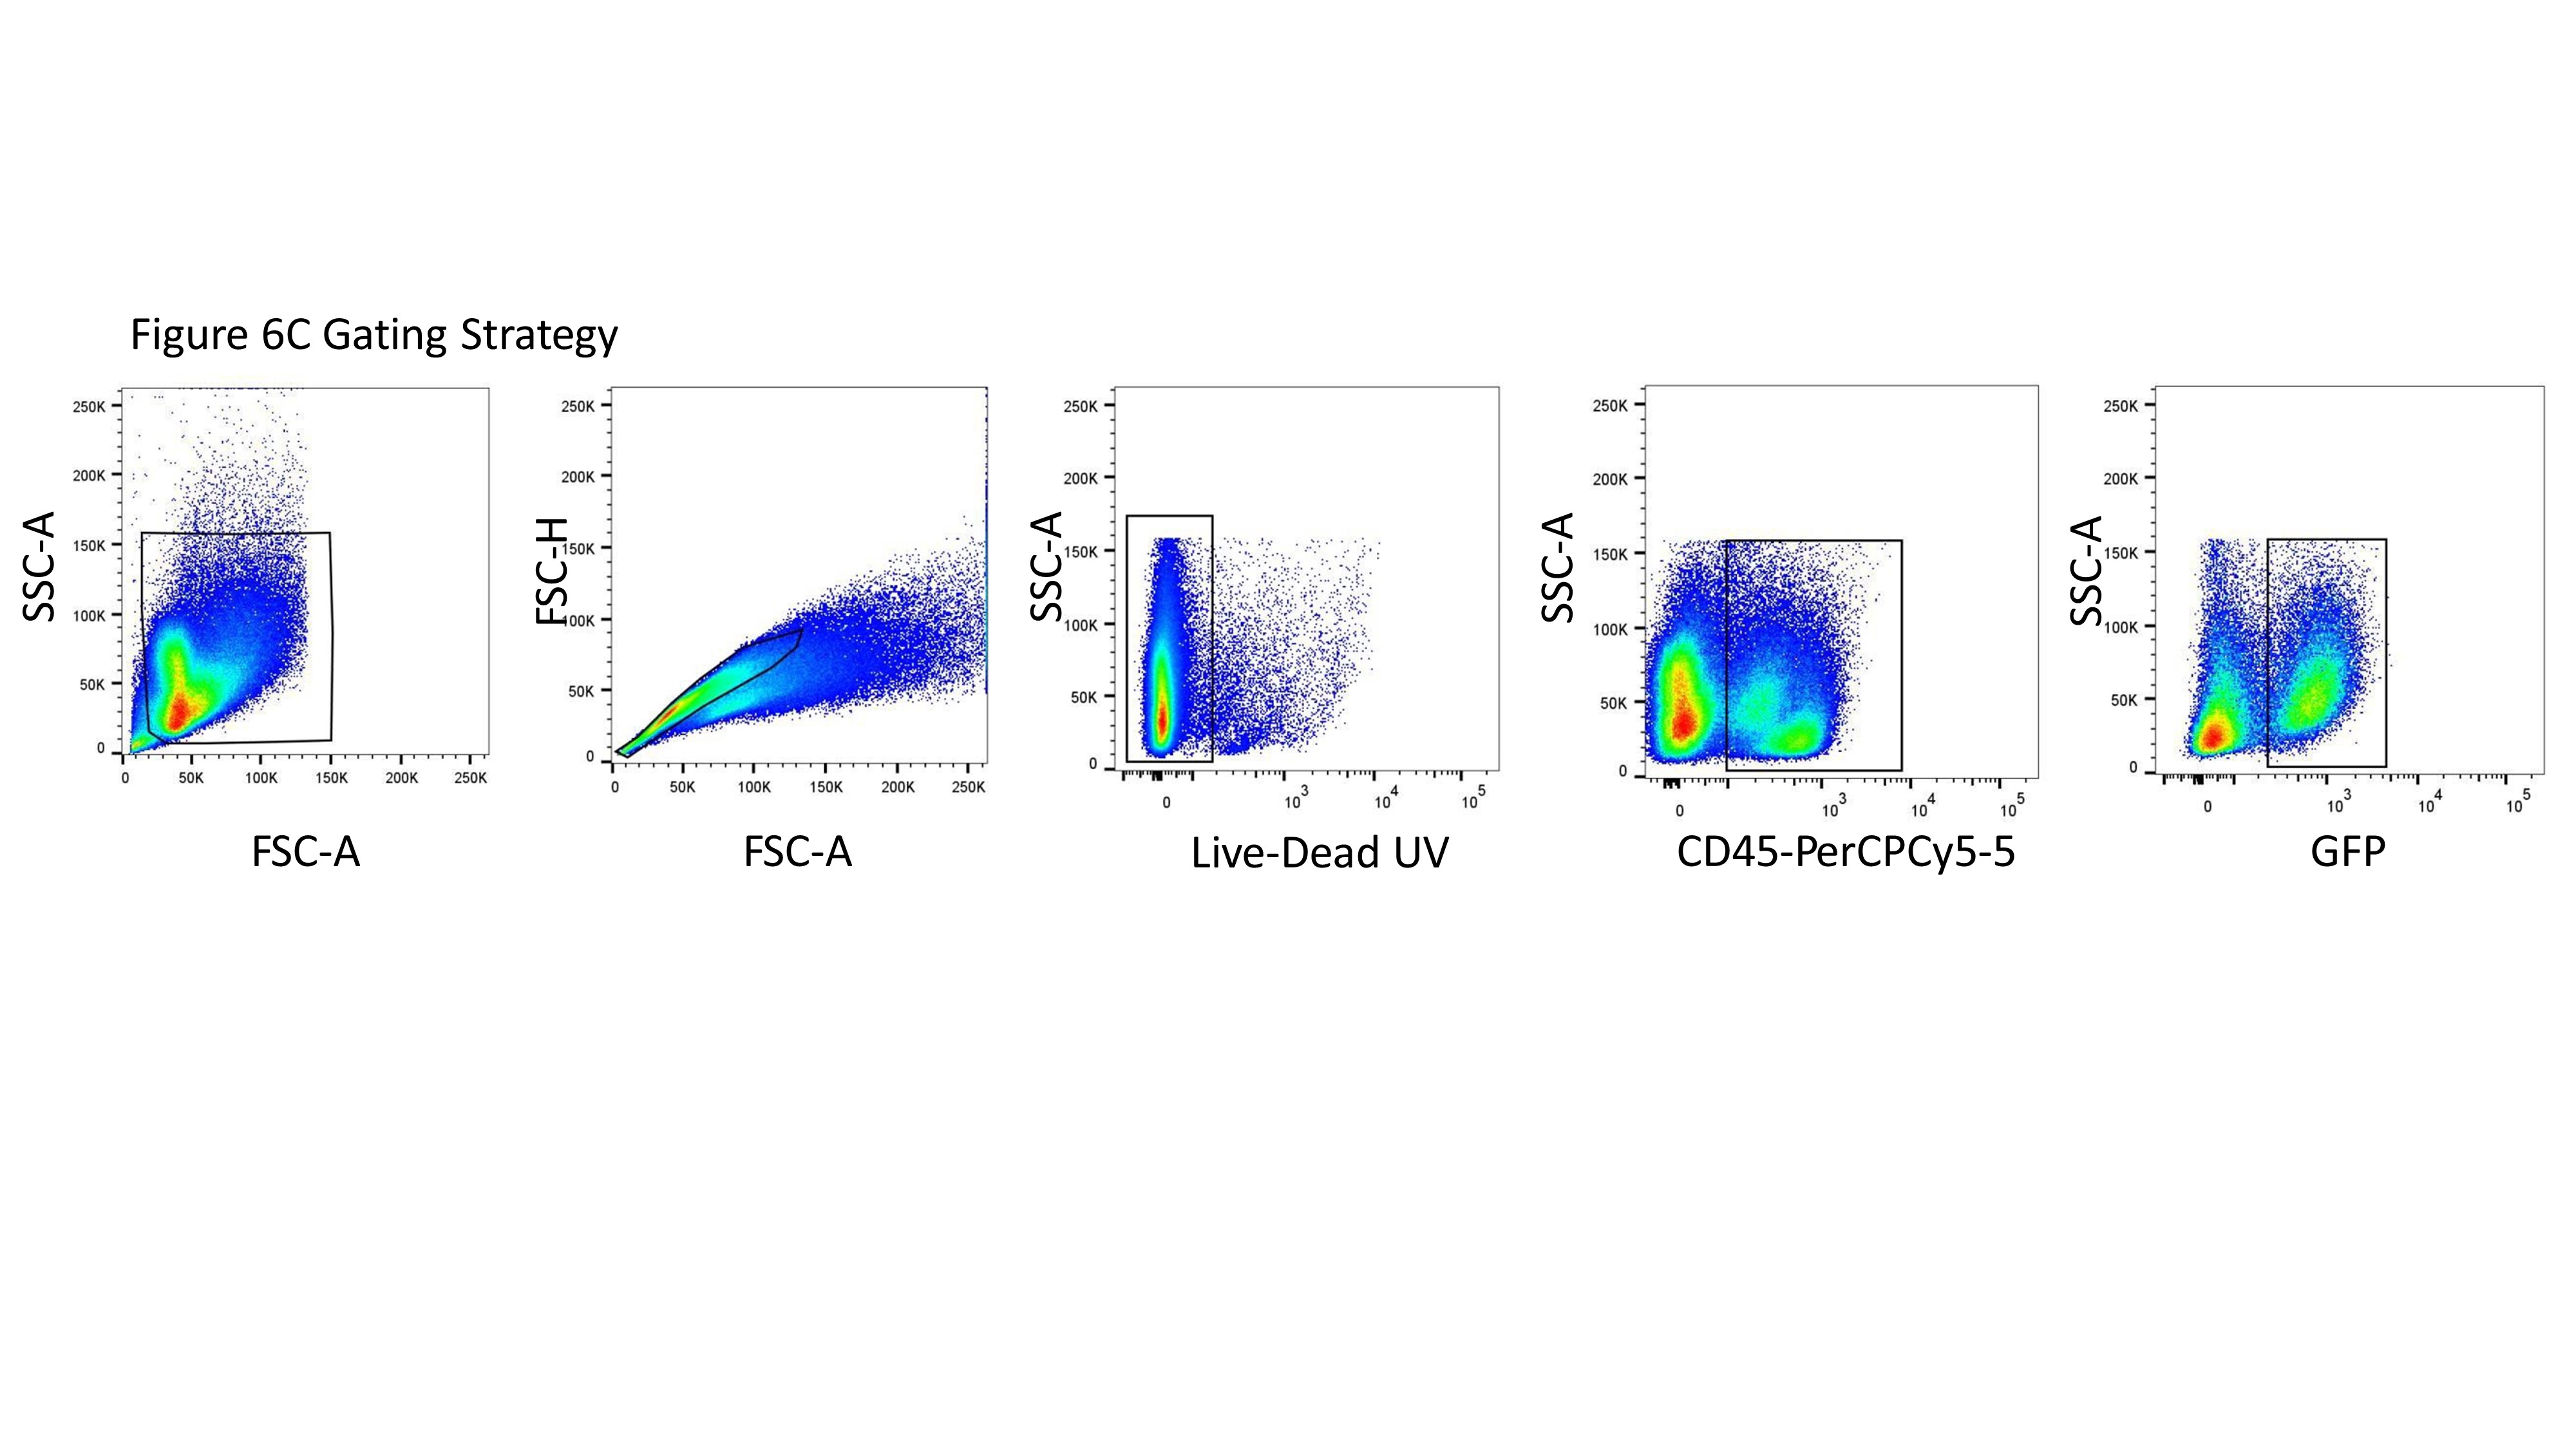


**Supplemental figure S10. Flow cytometry gating strategies for Figure 6C.** Single cell suspensions of harvested bone marrow, spleen, or peripheral blood were subjected to flow analysis using a LSRFortessa. Bone marrow gates are represented in figure. Cells were initially gated by SSC-A x FSC-A then further gated into singlets by FSH-A x FSC-A. Singlets were then Live gated by SSC-A x Live-Dead UV. The Live subset was then further gated by CD45-PerCPCy5-5 then GFP positivity.

| **MHC SUPERTYPE** | **# OF NOVEL CTL EPITOPES IDENTIFIED** | **CTL EPITOPES IDENTIFIED** |
| --- | --- | --- |
| A1 | 0 |  |
| A2 | 4 | SIISAVVGI AVVGILLVV ILLVVVLGV VVLGVVFGI |
| A3 | 1 | VARCPSGVK |
| A24 | 2 | HYKDPPFCV VVLGVVFGI |
| A26 | 1 | SIISAVVGI |
| B7 | 4 | QPQNGSVTC CPSGVKPDL KPDLSYMPI CPINCTHSC |
| B8 | 2 | VGILLVVVL LVVVLGVVF |
| B27 | 0 |  |
| B39 | 0 |  |
| B44 | 0 |  |
| B58 | 2 | LSYMPIWKF ISAVVGILL |
| B62 | 5 | PQNGSVTCF DQCVACAHY SGVKPDLSY LSYMPIWKF  LVVVLGVVF |
|  |  |  |

**Supplemental Table S1.** Her2tG MHC-1 epitope predictions. Complete data in Supplemental data file 1.
