# Supplementary material for: Rationally Designed Transgene-Encoded Cell-Surface Polypeptide Tag for Multiplexed Programming of CAR T-cell Synthetic Outputs
Source: Oxford University Press journal article supplement (doi:10.1158/2326-6066.cir-20-0470), 2021-07-09
Supplement: 23266066cir200470-sup-244597_2_supp_7229042_qvmymr.xlsx [file 23266066cir200470-sup-244597_2_supp_7229042_qvmymr.xlsx]

## Sheet: DATA RUBRIC
		ANALYSIS
		1. HER2tG amino acid sequence was entered into the submission section of the following website: http://www.cbs.dtu.dk/services/NetCTL/
		2. Each MHC class I supertype was chosen for analysis and each tab of this excel displays the results
		3. The following were left unchanged prior to submitting the query: Weight on C terminal cleavage (0.15) | Weight on TAP transport efficiency (0.05) | Threshold for epitope identification (0.75)
		4. Any peptide with a threshold above the established 0.75 is considered a potential MHC ligand and is identified as such with a (<-E) demarcation (and is highlighted in RED)
		5. The TABLE tab consolidates all potential CTL epitopes (potential MHC ligands) into a central table
		6. None of the predicted epitopes include the introduced (GGGSGGG) linker of HER2tG. Predicted CTL epitopes only align with endogenous HER2 sequences.
		RESULT COLUMNS
		Protein identifier
		pep
		Peptide sequence
		AFF
		Predicted MHC binding affinity. The value is give as 1 - log50k(aff), where log50k is the logarithm with base 50.000, and aff is the affinity in nM units
		aff_rescale
		Rescale binding affinity. The predicted binding affinity is normalized by the 1st percentile score
		cle
		C terminal cleavage affinity
		tap
		TAP transport efficiency
		COMB
		Prediction score
		<-E. Identified MHC ligands

## Sheet: A1
NetCTL-1.2 predictions using MHC supertype A1. Threshold 0.750000
1 ID Sequence pep CHPECQPQN aff 0.0491 aff_rescale 0.2085 cle 0.0496 tap -1.3660 COMB 0.1476
2 ID Sequence pep HPECQPQNG aff 0.0525 aff_rescale 0.2230 cle 0.1474 tap -1.9420 COMB 0.1480
3 ID Sequence pep PECQPQNGS aff 0.0478 aff_rescale 0.2028 cle 0.0345 tap -2.8750 COMB 0.0643
4 ID Sequence pep ECQPQNGSV aff 0.0568 aff_rescale 0.2412 cle 0.3696 tap -0.0460 COMB 0.2943
5 ID Sequence pep CQPQNGSVT aff 0.0552 aff_rescale 0.2345 cle 0.1895 tap -0.8530 COMB 0.2202
6 ID Sequence pep QPQNGSVTC aff 0.0570 aff_rescale 0.2419 cle 0.5316 tap -0.3160 COMB 0.3058
7 ID Sequence pep PQNGSVTCF aff 0.0470 aff_rescale 0.1995 cle 0.8712 tap 1.9870 COMB 0.4296
8 ID Sequence pep QNGSVTCFG aff 0.0579 aff_rescale 0.2457 cle 0.0275 tap -1.8430 COMB 0.1577
9 ID Sequence pep NGSVTCFGP aff 0.0513 aff_rescale 0.2176 cle 0.0372 tap -0.1780 COMB 0.2143
10 ID Sequence pep GSVTCFGPE aff 0.0571 aff_rescale 0.2424 cle 0.0246 tap -1.4850 COMB 0.1718
11 ID Sequence pep SVTCFGPEA aff 0.0693 aff_rescale 0.2944 cle 0.2948 tap -0.4100 COMB 0.3181
12 ID Sequence pep VTCFGPEAD aff 0.0559 aff_rescale 0.2374 cle 0.0278 tap -1.7120 COMB 0.1560
13 ID Sequence pep TCFGPEADQ aff 0.0477 aff_rescale 0.2026 cle 0.0547 tap 0.0530 COMB 0.2134
14 ID Sequence pep CFGPEADQC aff 0.0518 aff_rescale 0.2198 cle 0.0230 tap -0.0120 COMB 0.2227
15 ID Sequence pep FGPEADQCV aff 0.0587 aff_rescale 0.2492 cle 0.8878 tap -0.0690 COMB 0.3789
16 ID Sequence pep GPEADQCVA aff 0.0460 aff_rescale 0.1955 cle 0.9401 tap -1.2680 COMB 0.2731
17 ID Sequence pep PEADQCVAC aff 0.0466 aff_rescale 0.1980 cle 0.0603 tap -0.6140 COMB 0.1763
18 ID Sequence pep EADQCVACA aff 0.0721 aff_rescale 0.3062 cle 0.2650 tap -1.0080 COMB 0.2955
19 ID Sequence pep ADQCVACAH aff 0.0533 aff_rescale 0.2262 cle 0.0688 tap -0.8980 COMB 0.1916
20 ID Sequence pep DQCVACAHY aff 0.0846 aff_rescale 0.3591 cle 0.9200 tap 2.8470 COMB 0.6395
21 ID Sequence pep QCVACAHYK aff 0.0570 aff_rescale 0.2422 cle 0.0686 tap 0.4370 COMB 0.2743
22 ID Sequence pep CVACAHYKD aff 0.0666 aff_rescale 0.2827 cle 0.0240 tap -1.7500 COMB 0.1988
23 ID Sequence pep VACAHYKDP aff 0.0567 aff_rescale 0.2408 cle 0.0227 tap 0.2210 COMB 0.2553
24 ID Sequence pep ACAHYKDPP aff 0.0536 aff_rescale 0.2277 cle 0.0235 tap 0.3330 COMB 0.2479
25 ID Sequence pep CAHYKDPPF aff 0.0565 aff_rescale 0.2400 cle 0.4565 tap 2.7300 COMB 0.4450
26 ID Sequence pep AHYKDPPFC aff 0.0475 aff_rescale 0.2016 cle 0.0316 tap 0.3460 COMB 0.2236
27 ID Sequence pep HYKDPPFCV aff 0.0473 aff_rescale 0.2007 cle 0.9763 tap 0.6400 COMB 0.3791
28 ID Sequence pep YKDPPFCVA aff 0.0653 aff_rescale 0.2771 cle 0.9600 tap -0.7050 COMB 0.3858
29 ID Sequence pep KDPPFCVAR aff 0.0507 aff_rescale 0.2151 cle 0.8817 tap 1.2170 COMB 0.4082
30 ID Sequence pep DPPFCVARC aff 0.0497 aff_rescale 0.2110 cle 0.0606 tap -0.5200 COMB 0.1941
31 ID Sequence pep PPFCVARCP aff 0.0447 aff_rescale 0.1898 cle 0.1708 tap -0.7070 COMB 0.1800
32 ID Sequence pep PFCVARCPS aff 0.0487 aff_rescale 0.2066 cle 0.0274 tap -2.6940 COMB 0.0760
33 ID Sequence pep FCVARCPSG aff 0.0536 aff_rescale 0.2274 cle 0.0263 tap -1.5370 COMB 0.1545
34 ID Sequence pep CVARCPSGV aff 0.0713 aff_rescale 0.3029 cle 0.3335 tap 0.3240 COMB 0.3692
35 ID Sequence pep VARCPSGVK aff 0.0528 aff_rescale 0.2243 cle 0.2690 tap 0.6210 COMB 0.2957
36 ID Sequence pep ARCPSGVKP aff 0.0571 aff_rescale 0.2425 cle 0.0694 tap 0.5110 COMB 0.2785
37 ID Sequence pep RCPSGVKPD aff 0.0498 aff_rescale 0.2116 cle 0.0256 tap -1.4120 COMB 0.1449
38 ID Sequence pep CPSGVKPDL aff 0.0526 aff_rescale 0.2235 cle 0.8562 tap 0.7370 COMB 0.3888
39 ID Sequence pep PSGVKPDLS aff 0.0579 aff_rescale 0.2460 cle 0.0230 tap -2.8550 COMB 0.1067
40 ID Sequence pep SGVKPDLSY aff 0.0658 aff_rescale 0.2793 cle 0.7732 tap 2.6440 COMB 0.5275
41 ID Sequence pep GVKPDLSYM aff 0.0472 aff_rescale 0.2003 cle 0.8246 tap 0.3160 COMB 0.3398
42 ID Sequence pep VKPDLSYMP aff 0.0563 aff_rescale 0.2391 cle 0.0363 tap 0.1710 COMB 0.2531
43 ID Sequence pep KPDLSYMPI aff 0.0575 aff_rescale 0.2440 cle 0.9457 tap 0.2080 COMB 0.3962
44 ID Sequence pep PDLSYMPIW aff 0.0458 aff_rescale 0.1945 cle 0.9325 tap 0.2160 COMB 0.3451
45 ID Sequence pep DLSYMPIWK aff 0.0685 aff_rescale 0.2909 cle 0.4285 tap 0.0190 COMB 0.3561
46 ID Sequence pep LSYMPIWKF aff 0.0952 aff_rescale 0.4043 cle 0.8074 tap 2.6270 COMB 0.6567
47 ID Sequence pep SYMPIWKFP aff 0.0479 aff_rescale 0.2033 cle 0.0569 tap 0.5350 COMB 0.2385
48 ID Sequence pep YMPIWKFPD aff 0.0675 aff_rescale 0.2864 cle 0.1287 tap -1.6750 COMB 0.2219
49 ID Sequence pep MPIWKFPDE aff 0.0539 aff_rescale 0.2291 cle 0.5043 tap -1.8060 COMB 0.2144
50 ID Sequence pep PIWKFPDEE aff 0.0537 aff_rescale 0.2280 cle 0.2338 tap -1.7090 COMB 0.1776
51 ID Sequence pep IWKFPDEEG aff 0.0453 aff_rescale 0.1923 cle 0.1752 tap -1.2730 COMB 0.1550
52 ID Sequence pep WKFPDEEGA aff 0.0459 aff_rescale 0.1948 cle 0.1004 tap -0.3920 COMB 0.1902
53 ID Sequence pep KFPDEEGAC aff 0.0500 aff_rescale 0.2125 cle 0.0476 tap 0.2180 COMB 0.2305
54 ID Sequence pep FPDEEGACQ aff 0.0532 aff_rescale 0.2260 cle 0.1122 tap -0.5800 COMB 0.2139
55 ID Sequence pep PDEEGACQP aff 0.0447 aff_rescale 0.1898 cle 0.0360 tap -0.9320 COMB 0.1486
56 ID Sequence pep DEEGACQPC aff 0.0471 aff_rescale 0.2000 cle 0.0268 tap -0.7260 COMB 0.1677
57 ID Sequence pep EEGACQPCP aff 0.0501 aff_rescale 0.2129 cle 0.0246 tap -0.5370 COMB 0.1898
58 ID Sequence pep EGACQPCPI aff 0.0502 aff_rescale 0.2131 cle 0.1443 tap -0.0860 COMB 0.2304
59 ID Sequence pep GACQPCPIN aff 0.0488 aff_rescale 0.2071 cle 0.0336 tap -1.6000 COMB 0.1322
60 ID Sequence pep ACQPCPINC aff 0.0518 aff_rescale 0.2201 cle 0.0235 tap 0.1170 COMB 0.2294
61 ID Sequence pep CQPCPINCT aff 0.0514 aff_rescale 0.2182 cle 0.1787 tap -0.5320 COMB 0.2184
62 ID Sequence pep QPCPINCTH aff 0.0581 aff_rescale 0.2465 cle 0.9102 tap -0.8250 COMB 0.3418
63 ID Sequence pep PCPINCTHS aff 0.0468 aff_rescale 0.1985 cle 0.1806 tap -2.7690 COMB 0.0871
64 ID Sequence pep CPINCTHSC aff 0.0543 aff_rescale 0.2305 cle 0.0637 tap -0.4070 COMB 0.2197
65 ID Sequence pep PINCTHSCV aff 0.0573 aff_rescale 0.2434 cle 0.9611 tap -0.1380 COMB 0.3807
66 ID Sequence pep INCTHSCVD aff 0.0542 aff_rescale 0.2302 cle 0.0319 tap -2.0810 COMB 0.1309
67 ID Sequence pep NCTHSCVDL aff 0.0493 aff_rescale 0.2093 cle 0.5220 tap 0.9850 COMB 0.3369
68 ID Sequence pep CTHSCVDLD aff 0.0827 aff_rescale 0.3510 cle 0.0237 tap -1.7070 COMB 0.2692
69 ID Sequence pep THSCVDLDD aff 0.0553 aff_rescale 0.2346 cle 0.0626 tap -1.8400 COMB 0.1520
70 ID Sequence pep HSCVDLDDK aff 0.0742 aff_rescale 0.3150 cle 0.1675 tap 0.4330 COMB 0.3617
71 ID Sequence pep SCVDLDDKG aff 0.0535 aff_rescale 0.2270 cle 0.0337 tap -1.2670 COMB 0.1687
72 ID Sequence pep CVDLDDKGC aff 0.0569 aff_rescale 0.2414 cle 0.0279 tap -0.0100 COMB 0.2451
73 ID Sequence pep VDLDDKGCP aff 0.0470 aff_rescale 0.1997 cle 0.0368 tap -0.1300 COMB 0.1987
74 ID Sequence pep DLDDKGCPA aff 0.0648 aff_rescale 0.2753 cle 0.8155 tap -0.9610 COMB 0.3496
75 ID Sequence pep LDDKGCPAE aff 0.0464 aff_rescale 0.1971 cle 0.0997 tap -2.1840 COMB 0.1028
76 ID Sequence pep DDKGCPAEQ aff 0.0415 aff_rescale 0.1763 cle 0.3422 tap -0.6830 COMB 0.1935
77 ID Sequence pep DKGCPAEQR aff 0.0503 aff_rescale 0.2134 cle 0.4259 tap 0.9160 COMB 0.3230
78 ID Sequence pep KGCPAEQRA aff 0.0538 aff_rescale 0.2286 cle 0.2496 tap -0.8250 COMB 0.2248
79 ID Sequence pep GCPAEQRAS aff 0.0487 aff_rescale 0.2069 cle 0.0242 tap -2.3180 COMB 0.0946
80 ID Sequence pep CPAEQRASP aff 0.0545 aff_rescale 0.2312 cle 0.3231 tap -0.2540 COMB 0.2670
81 ID Sequence pep PAEQRASPL aff 0.0614 aff_rescale 0.2607 cle 0.9247 tap 0.3760 COMB 0.4182
82 ID Sequence pep AEQRASPLT aff 0.0562 aff_rescale 0.2387 cle 0.2007 tap -0.8740 COMB 0.2251
83 ID Sequence pep EQRASPLTG aff 0.0520 aff_rescale 0.2207 cle 0.1196 tap -1.3210 COMB 0.1726
84 ID Sequence pep QRASPLTGG aff 0.0557 aff_rescale 0.2365 cle 0.2416 tap -1.3260 COMB 0.2064
85 ID Sequence pep RASPLTGGG aff 0.0606 aff_rescale 0.2573 cle 0.0749 tap -1.1520 COMB 0.2109
86 ID Sequence pep ASPLTGGGS aff 0.0630 aff_rescale 0.2674 cle 0.0276 tap -1.9440 COMB 0.1743
87 ID Sequence pep SPLTGGGSG aff 0.0584 aff_rescale 0.2480 cle 0.4658 tap -1.4750 COMB 0.2441
88 ID Sequence pep PLTGGGSGG aff 0.0502 aff_rescale 0.2131 cle 0.0305 tap -1.8380 COMB 0.1258
89 ID Sequence pep LTGGGSGGG aff 0.0613 aff_rescale 0.2602 cle 0.0267 tap -1.7210 COMB 0.1781
90 ID Sequence pep TGGGSGGGS aff 0.0550 aff_rescale 0.2337 cle 0.0238 tap -2.6480 COMB 0.1049
91 ID Sequence pep GGGSGGGSI aff 0.0546 aff_rescale 0.2320 cle 0.0773 tap -0.0640 COMB 0.2404
92 ID Sequence pep GGSGGGSII aff 0.0503 aff_rescale 0.2136 cle 0.2937 tap 0.0550 COMB 0.2604
93 ID Sequence pep GSGGGSIIS aff 0.0581 aff_rescale 0.2467 cle 0.0470 tap -2.5770 COMB 0.1249
94 ID Sequence pep SGGGSIISA aff 0.0587 aff_rescale 0.2492 cle 0.0816 tap -0.9420 COMB 0.2143
95 ID Sequence pep GGGSIISAV aff 0.0578 aff_rescale 0.2455 cle 0.1279 tap -0.2400 COMB 0.2527
96 ID Sequence pep GGSIISAVV aff 0.0500 aff_rescale 0.2124 cle 0.4797 tap -0.1650 COMB 0.2761
97 ID Sequence pep GSIISAVVG aff 0.0518 aff_rescale 0.2198 cle 0.0237 tap -1.4950 COMB 0.1487
98 ID Sequence pep SIISAVVGI aff 0.0687 aff_rescale 0.2916 cle 0.1874 tap 0.7550 COMB 0.3575
99 ID Sequence pep IISAVVGIL aff 0.0739 aff_rescale 0.3138 cle 0.5148 tap 1.1560 COMB 0.4488
100 ID Sequence pep ISAVVGILL aff 0.1201 aff_rescale 0.5099 cle 0.2648 tap 1.0440 COMB 0.6019
101 ID Sequence pep SAVVGILLV aff 0.0887 aff_rescale 0.3768 cle 0.3325 tap 0.5070 COMB 0.4520
102 ID Sequence pep AVVGILLVV aff 0.0662 aff_rescale 0.2810 cle 0.7946 tap 0.7290 COMB 0.4366
103 ID Sequence pep VVGILLVVV aff 0.0627 aff_rescale 0.2662 cle 0.2172 tap 0.5060 COMB 0.3241
104 ID Sequence pep VGILLVVVL aff 0.0547 aff_rescale 0.2322 cle 0.3706 tap 0.8660 COMB 0.3310
105 ID Sequence pep GILLVVVLG aff 0.0561 aff_rescale 0.2381 cle 0.0384 tap -1.3810 COMB 0.1748
106 ID Sequence pep ILLVVVLGV aff 0.0693 aff_rescale 0.2941 cle 0.5281 tap 0.3450 COMB 0.3906
107 ID Sequence pep LLVVVLGVV aff 0.0663 aff_rescale 0.2816 cle 0.5579 tap 0.4250 COMB 0.3865
108 ID Sequence pep LVVVLGVVF aff 0.0606 aff_rescale 0.2574 cle 0.4182 tap 2.8030 COMB 0.4603
109 ID Sequence pep VVVLGVVFG aff 0.0547 aff_rescale 0.2322 cle 0.0557 tap -1.0690 COMB 0.1871
110 ID Sequence pep VVLGVVFGI aff 0.0632 aff_rescale 0.2684 cle 0.8816 tap 0.8000 COMB 0.4406
111 ID Sequence pep VLGVVFGIL aff 0.0706 aff_rescale 0.2997 cle 0.8738 tap 0.9200 COMB 0.4767
112 ID Sequence pep LGVVFGILI aff 0.0619 aff_rescale 0.2628 cle 0.5499 tap 0.3970 COMB 0.3651

## Sheet: A2
NetCTL-1.2 predictions using MHC supertype A2. Threshold 0.750000
1 ID Sequence pep CHPECQPQN aff 0.0038 aff_rescale 0.0057 cle 0.0496 tap -1.3660 COMB -0.0552
2 ID Sequence pep HPECQPQNG aff 0.0011 aff_rescale 0.0016 cle 0.1474 tap -1.9420 COMB -0.0734
3 ID Sequence pep PECQPQNGS aff 0.0005 aff_rescale 0.0007 cle 0.0345 tap -2.8750 COMB -0.1379
4 ID Sequence pep ECQPQNGSV aff 0.0108 aff_rescale 0.0161 cle 0.3696 tap -0.0460 COMB 0.0692
5 ID Sequence pep CQPQNGSVT aff 0.0136 aff_rescale 0.0203 cle 0.1895 tap -0.8530 COMB 0.0061
6 ID Sequence pep QPQNGSVTC aff 0.0027 aff_rescale 0.0040 cle 0.5316 tap -0.3160 COMB 0.0680
7 ID Sequence pep PQNGSVTCF aff 0.0052 aff_rescale 0.0078 cle 0.8712 tap 1.9870 COMB 0.2378
8 ID Sequence pep QNGSVTCFG aff 0.0079 aff_rescale 0.0118 cle 0.0275 tap -1.8430 COMB -0.0762
9 ID Sequence pep NGSVTCFGP aff 0.0090 aff_rescale 0.0135 cle 0.0372 tap -0.1780 COMB 0.0102
10 ID Sequence pep GSVTCFGPE aff 0.0069 aff_rescale 0.0104 cle 0.0246 tap -1.4850 COMB -0.0602
11 ID Sequence pep SVTCFGPEA aff 0.2494 aff_rescale 0.3718 cle 0.2948 tap -0.4100 COMB 0.3955
12 ID Sequence pep VTCFGPEAD aff 0.0051 aff_rescale 0.0076 cle 0.0278 tap -1.7120 COMB -0.0738
13 ID Sequence pep TCFGPEADQ aff 0.0052 aff_rescale 0.0078 cle 0.0547 tap 0.0530 COMB 0.0187
14 ID Sequence pep CFGPEADQC aff 0.0020 aff_rescale 0.0030 cle 0.0230 tap -0.0120 COMB 0.0058
15 ID Sequence pep FGPEADQCV aff 0.1352 aff_rescale 0.2015 cle 0.8878 tap -0.0690 COMB 0.3312
16 ID Sequence pep GPEADQCVA aff 0.0046 aff_rescale 0.0069 cle 0.9401 tap -1.2680 COMB 0.0845
17 ID Sequence pep PEADQCVAC aff 0.0015 aff_rescale 0.0022 cle 0.0603 tap -0.6140 COMB -0.0194
18 ID Sequence pep EADQCVACA aff 0.0664 aff_rescale 0.0990 cle 0.2650 tap -1.0080 COMB 0.0884
19 ID Sequence pep ADQCVACAH aff 0.0025 aff_rescale 0.0038 cle 0.0688 tap -0.8980 COMB -0.0308
20 ID Sequence pep DQCVACAHY aff 0.0013 aff_rescale 0.0019 cle 0.9200 tap 2.8470 COMB 0.2823
21 ID Sequence pep QCVACAHYK aff 0.0062 aff_rescale 0.0092 cle 0.0686 tap 0.4370 COMB 0.0413
22 ID Sequence pep CVACAHYKD aff 0.0172 aff_rescale 0.0256 cle 0.0240 tap -1.7500 COMB -0.0583
23 ID Sequence pep VACAHYKDP aff 0.0029 aff_rescale 0.0043 cle 0.0227 tap 0.2210 COMB 0.0187
24 ID Sequence pep ACAHYKDPP aff 0.0114 aff_rescale 0.0170 cle 0.0235 tap 0.3330 COMB 0.0372
25 ID Sequence pep CAHYKDPPF aff 0.0127 aff_rescale 0.0189 cle 0.4565 tap 2.7300 COMB 0.2239
26 ID Sequence pep AHYKDPPFC aff 0.0148 aff_rescale 0.0221 cle 0.0316 tap 0.3460 COMB 0.0442
27 ID Sequence pep HYKDPPFCV aff 0.0431 aff_rescale 0.0642 cle 0.9763 tap 0.6400 COMB 0.2426
28 ID Sequence pep YKDPPFCVA aff 0.0589 aff_rescale 0.0878 cle 0.9600 tap -0.7050 COMB 0.1966
29 ID Sequence pep KDPPFCVAR aff 0.0042 aff_rescale 0.0063 cle 0.8817 tap 1.2170 COMB 0.1994
30 ID Sequence pep DPPFCVARC aff 0.0018 aff_rescale 0.0026 cle 0.0606 tap -0.5200 COMB -0.0143
31 ID Sequence pep PPFCVARCP aff 0.0010 aff_rescale 0.0015 cle 0.1708 tap -0.7070 COMB -0.0082
32 ID Sequence pep PFCVARCPS aff 0.0010 aff_rescale 0.0015 cle 0.0274 tap -2.6940 COMB -0.1290
33 ID Sequence pep FCVARCPSG aff 0.0350 aff_rescale 0.0522 cle 0.0263 tap -1.5370 COMB -0.0207
34 ID Sequence pep CVARCPSGV aff 0.2588 aff_rescale 0.3858 cle 0.3335 tap 0.3240 COMB 0.4520
35 ID Sequence pep VARCPSGVK aff 0.0010 aff_rescale 0.0015 cle 0.2690 tap 0.6210 COMB 0.0729
36 ID Sequence pep ARCPSGVKP aff 0.0030 aff_rescale 0.0045 cle 0.0694 tap 0.5110 COMB 0.0404
37 ID Sequence pep RCPSGVKPD aff 0.0030 aff_rescale 0.0044 cle 0.0256 tap -1.4120 COMB -0.0623
38 ID Sequence pep CPSGVKPDL aff 0.0061 aff_rescale 0.0090 cle 0.8562 tap 0.7370 COMB 0.1743
39 ID Sequence pep PSGVKPDLS aff 0.0017 aff_rescale 0.0025 cle 0.0230 tap -2.8550 COMB -0.1368
40 ID Sequence pep SGVKPDLSY aff 0.0028 aff_rescale 0.0041 cle 0.7732 tap 2.6440 COMB 0.2523
41 ID Sequence pep GVKPDLSYM aff 0.0969 aff_rescale 0.1444 cle 0.8246 tap 0.3160 COMB 0.2839
42 ID Sequence pep VKPDLSYMP aff 0.0188 aff_rescale 0.0280 cle 0.0363 tap 0.1710 COMB 0.0420
43 ID Sequence pep KPDLSYMPI aff 0.0331 aff_rescale 0.0493 cle 0.9457 tap 0.2080 COMB 0.2016
44 ID Sequence pep PDLSYMPIW aff 0.0030 aff_rescale 0.0045 cle 0.9325 tap 0.2160 COMB 0.1552
45 ID Sequence pep DLSYMPIWK aff 0.0206 aff_rescale 0.0307 cle 0.4285 tap 0.0190 COMB 0.0959
46 ID Sequence pep LSYMPIWKF aff 0.0360 aff_rescale 0.0536 cle 0.8074 tap 2.6270 COMB 0.3061
47 ID Sequence pep SYMPIWKFP aff 0.0121 aff_rescale 0.0181 cle 0.0569 tap 0.5350 COMB 0.0534
48 ID Sequence pep YMPIWKFPD aff 0.1722 aff_rescale 0.2567 cle 0.1287 tap -1.6750 COMB 0.1922
49 ID Sequence pep MPIWKFPDE aff 0.0061 aff_rescale 0.0090 cle 0.5043 tap -1.8060 COMB -0.0056
50 ID Sequence pep PIWKFPDEE aff 0.0117 aff_rescale 0.0175 cle 0.2338 tap -1.7090 COMB -0.0329
51 ID Sequence pep IWKFPDEEG aff 0.0020 aff_rescale 0.0030 cle 0.1752 tap -1.2730 COMB -0.0344
52 ID Sequence pep WKFPDEEGA aff 0.0419 aff_rescale 0.0625 cle 0.1004 tap -0.3920 COMB 0.0579
53 ID Sequence pep KFPDEEGAC aff 0.0043 aff_rescale 0.0064 cle 0.0476 tap 0.2180 COMB 0.0245
54 ID Sequence pep FPDEEGACQ aff 0.0140 aff_rescale 0.0208 cle 0.1122 tap -0.5800 COMB 0.0087
55 ID Sequence pep PDEEGACQP aff 0.0006 aff_rescale 0.0009 cle 0.0360 tap -0.9320 COMB -0.0403
56 ID Sequence pep DEEGACQPC aff 0.0005 aff_rescale 0.0008 cle 0.0268 tap -0.7260 COMB -0.0315
57 ID Sequence pep EEGACQPCP aff 0.0037 aff_rescale 0.0055 cle 0.0246 tap -0.5370 COMB -0.0177
58 ID Sequence pep EGACQPCPI aff 0.0105 aff_rescale 0.0156 cle 0.1443 tap -0.0860 COMB 0.0329
59 ID Sequence pep GACQPCPIN aff 0.0042 aff_rescale 0.0063 cle 0.0336 tap -1.6000 COMB -0.0687
60 ID Sequence pep ACQPCPINC aff 0.0121 aff_rescale 0.0180 cle 0.0235 tap 0.1170 COMB 0.0274
61 ID Sequence pep CQPCPINCT aff 0.0346 aff_rescale 0.0516 cle 0.1787 tap -0.5320 COMB 0.0518
62 ID Sequence pep QPCPINCTH aff 0.0013 aff_rescale 0.0019 cle 0.9102 tap -0.8250 COMB 0.0972
63 ID Sequence pep PCPINCTHS aff 0.0008 aff_rescale 0.0012 cle 0.1806 tap -2.7690 COMB -0.1101
64 ID Sequence pep CPINCTHSC aff 0.0090 aff_rescale 0.0134 cle 0.0637 tap -0.4070 COMB 0.0026
65 ID Sequence pep PINCTHSCV aff 0.0729 aff_rescale 0.1086 cle 0.9611 tap -0.1380 COMB 0.2459
66 ID Sequence pep INCTHSCVD aff 0.0021 aff_rescale 0.0031 cle 0.0319 tap -2.0810 COMB -0.0962
67 ID Sequence pep NCTHSCVDL aff 0.0195 aff_rescale 0.0291 cle 0.5220 tap 0.9850 COMB 0.1567
68 ID Sequence pep CTHSCVDLD aff 0.0177 aff_rescale 0.0264 cle 0.0237 tap -1.7070 COMB -0.0554
69 ID Sequence pep THSCVDLDD aff 0.0031 aff_rescale 0.0047 cle 0.0626 tap -1.8400 COMB -0.0780
70 ID Sequence pep HSCVDLDDK aff 0.0025 aff_rescale 0.0037 cle 0.1675 tap 0.4330 COMB 0.0505
71 ID Sequence pep SCVDLDDKG aff 0.0082 aff_rescale 0.0122 cle 0.0337 tap -1.2670 COMB -0.0461
72 ID Sequence pep CVDLDDKGC aff 0.0059 aff_rescale 0.0088 cle 0.0279 tap -0.0100 COMB 0.0125
73 ID Sequence pep VDLDDKGCP aff 0.0041 aff_rescale 0.0061 cle 0.0368 tap -0.1300 COMB 0.0051
74 ID Sequence pep DLDDKGCPA aff 0.1132 aff_rescale 0.1688 cle 0.8155 tap -0.9610 COMB 0.2431
75 ID Sequence pep LDDKGCPAE aff 0.0051 aff_rescale 0.0076 cle 0.0997 tap -2.1840 COMB -0.0866
76 ID Sequence pep DDKGCPAEQ aff 0.0007 aff_rescale 0.0011 cle 0.3422 tap -0.6830 COMB 0.0182
77 ID Sequence pep DKGCPAEQR aff 0.0006 aff_rescale 0.0008 cle 0.4259 tap 0.9160 COMB 0.1105
78 ID Sequence pep KGCPAEQRA aff 0.0113 aff_rescale 0.0168 cle 0.2496 tap -0.8250 COMB 0.0130
79 ID Sequence pep GCPAEQRAS aff 0.0034 aff_rescale 0.0050 cle 0.0242 tap -2.3180 COMB -0.1073
80 ID Sequence pep CPAEQRASP aff 0.0029 aff_rescale 0.0043 cle 0.3231 tap -0.2540 COMB 0.0401
81 ID Sequence pep PAEQRASPL aff 0.0071 aff_rescale 0.0106 cle 0.9247 tap 0.3760 COMB 0.1681
82 ID Sequence pep AEQRASPLT aff 0.0167 aff_rescale 0.0248 cle 0.2007 tap -0.8740 COMB 0.0112
83 ID Sequence pep EQRASPLTG aff 0.0040 aff_rescale 0.0060 cle 0.1196 tap -1.3210 COMB -0.0421
84 ID Sequence pep QRASPLTGG aff 0.0047 aff_rescale 0.0071 cle 0.2416 tap -1.3260 COMB -0.0230
85 ID Sequence pep RASPLTGGG aff 0.0100 aff_rescale 0.0149 cle 0.0749 tap -1.1520 COMB -0.0315
86 ID Sequence pep ASPLTGGGS aff 0.0045 aff_rescale 0.0068 cle 0.0276 tap -1.9440 COMB -0.0863
87 ID Sequence pep SPLTGGGSG aff 0.0034 aff_rescale 0.0051 cle 0.4658 tap -1.4750 COMB 0.0012
88 ID Sequence pep PLTGGGSGG aff 0.0067 aff_rescale 0.0100 cle 0.0305 tap -1.8380 COMB -0.0774
89 ID Sequence pep LTGGGSGGG aff 0.0076 aff_rescale 0.0114 cle 0.0267 tap -1.7210 COMB -0.0707
90 ID Sequence pep TGGGSGGGS aff 0.0021 aff_rescale 0.0031 cle 0.0238 tap -2.6480 COMB -0.1257
91 ID Sequence pep GGGSGGGSI aff 0.0091 aff_rescale 0.0135 cle 0.0773 tap -0.0640 COMB 0.0219
92 ID Sequence pep GGSGGGSII aff 0.0133 aff_rescale 0.0198 cle 0.2937 tap 0.0550 COMB 0.0666
93 ID Sequence pep GSGGGSIIS aff 0.0171 aff_rescale 0.0255 cle 0.0470 tap -2.5770 COMB -0.0963
94 ID Sequence pep SGGGSIISA aff 0.0700 aff_rescale 0.1043 cle 0.0816 tap -0.9420 COMB 0.0695
95 ID Sequence pep GGGSIISAV aff 0.1166 aff_rescale 0.1738 cle 0.1279 tap -0.2400 COMB 0.1810
96 ID Sequence pep GGSIISAVV aff 0.0824 aff_rescale 0.1229 cle 0.4797 tap -0.1650 COMB 0.1866
97 ID Sequence pep GSIISAVVG aff 0.0083 aff_rescale 0.0124 cle 0.0237 tap -1.4950 COMB -0.0588
98 ID Sequence pep SIISAVVGI aff 0.6099 aff_rescale 0.9091 cle 0.1874 tap 0.7550 COMB 0.9750 <-E
99 ID Sequence pep IISAVVGIL aff 0.2522 aff_rescale 0.3759 cle 0.5148 tap 1.1560 COMB 0.5110
100 ID Sequence pep ISAVVGILL aff 0.1491 aff_rescale 0.2223 cle 0.2648 tap 1.0440 COMB 0.3142
101 ID Sequence pep SAVVGILLV aff 0.3666 aff_rescale 0.5465 cle 0.3325 tap 0.5070 COMB 0.6217
102 ID Sequence pep AVVGILLVV aff 0.4990 aff_rescale 0.7439 cle 0.7946 tap 0.7290 COMB 0.8995 <-E
103 ID Sequence pep VVGILLVVV aff 0.2776 aff_rescale 0.4138 cle 0.2172 tap 0.5060 COMB 0.4717
104 ID Sequence pep VGILLVVVL aff 0.0754 aff_rescale 0.1124 cle 0.3706 tap 0.8660 COMB 0.2113
105 ID Sequence pep GILLVVVLG aff 0.0846 aff_rescale 0.1261 cle 0.0384 tap -1.3810 COMB 0.0628
106 ID Sequence pep ILLVVVLGV aff 0.7398 aff_rescale 1.1028 cle 0.5281 tap 0.3450 COMB 1.1992 <-E
107 ID Sequence pep LLVVVLGVV aff 0.3753 aff_rescale 0.5595 cle 0.5579 tap 0.4250 COMB 0.6644
108 ID Sequence pep LVVVLGVVF aff 0.0215 aff_rescale 0.0320 cle 0.4182 tap 2.8030 COMB 0.2349
109 ID Sequence pep VVVLGVVFG aff 0.0560 aff_rescale 0.0834 cle 0.0557 tap -1.0690 COMB 0.0383
110 ID Sequence pep VVLGVVFGI aff 0.6404 aff_rescale 0.9546 cle 0.8816 tap 0.8000 COMB 1.1268 <-E
111 ID Sequence pep VLGVVFGIL aff 0.2320 aff_rescale 0.3458 cle 0.8738 tap 0.9200 COMB 0.5229
112 ID Sequence pep LGVVFGILI aff 0.0737 aff_rescale 0.1099 cle 0.5499 tap 0.3970 COMB 0.2123

## Sheet: A3
NetCTL-1.2 predictions using MHC supertype A3. Threshold 0.750000
1 ID Sequence pep CHPECQPQN aff 0.0081 aff_rescale 0.0153 cle 0.0496 tap -1.3660 COMB -0.0456
2 ID Sequence pep HPECQPQNG aff 0.0081 aff_rescale 0.0152 cle 0.1474 tap -1.9420 COMB -0.0598
3 ID Sequence pep PECQPQNGS aff 0.0073 aff_rescale 0.0137 cle 0.0345 tap -2.8750 COMB -0.1249
4 ID Sequence pep ECQPQNGSV aff 0.0087 aff_rescale 0.0164 cle 0.3696 tap -0.0460 COMB 0.0695
5 ID Sequence pep CQPQNGSVT aff 0.0135 aff_rescale 0.0253 cle 0.1895 tap -0.8530 COMB 0.0111
6 ID Sequence pep QPQNGSVTC aff 0.0078 aff_rescale 0.0146 cle 0.5316 tap -0.3160 COMB 0.0786
7 ID Sequence pep PQNGSVTCF aff 0.0162 aff_rescale 0.0304 cle 0.8712 tap 1.9870 COMB 0.2604
8 ID Sequence pep QNGSVTCFG aff 0.0095 aff_rescale 0.0179 cle 0.0275 tap -1.8430 COMB -0.0702
9 ID Sequence pep NGSVTCFGP aff 0.0110 aff_rescale 0.0207 cle 0.0372 tap -0.1780 COMB 0.0174
10 ID Sequence pep GSVTCFGPE aff 0.0244 aff_rescale 0.0459 cle 0.0246 tap -1.4850 COMB -0.0247
11 ID Sequence pep SVTCFGPEA aff 0.0306 aff_rescale 0.0576 cle 0.2948 tap -0.4100 COMB 0.0813
12 ID Sequence pep VTCFGPEAD aff 0.0110 aff_rescale 0.0206 cle 0.0278 tap -1.7120 COMB -0.0608
13 ID Sequence pep TCFGPEADQ aff 0.0165 aff_rescale 0.0310 cle 0.0547 tap 0.0530 COMB 0.0419
14 ID Sequence pep CFGPEADQC aff 0.0073 aff_rescale 0.0138 cle 0.0230 tap -0.0120 COMB 0.0167
15 ID Sequence pep FGPEADQCV aff 0.0072 aff_rescale 0.0136 cle 0.8878 tap -0.0690 COMB 0.1433
16 ID Sequence pep GPEADQCVA aff 0.0076 aff_rescale 0.0143 cle 0.9401 tap -1.2680 COMB 0.0919
17 ID Sequence pep PEADQCVAC aff 0.0074 aff_rescale 0.0139 cle 0.0603 tap -0.6140 COMB -0.0077
18 ID Sequence pep EADQCVACA aff 0.0104 aff_rescale 0.0196 cle 0.2650 tap -1.0080 COMB 0.0089
19 ID Sequence pep ADQCVACAH aff 0.0139 aff_rescale 0.0261 cle 0.0688 tap -0.8980 COMB -0.0084
20 ID Sequence pep DQCVACAHY aff 0.0189 aff_rescale 0.0355 cle 0.9200 tap 2.8470 COMB 0.3159
21 ID Sequence pep QCVACAHYK aff 0.1703 aff_rescale 0.3204 cle 0.0686 tap 0.4370 COMB 0.3526
22 ID Sequence pep CVACAHYKD aff 0.0210 aff_rescale 0.0395 cle 0.0240 tap -1.7500 COMB -0.0444
23 ID Sequence pep VACAHYKDP aff 0.0131 aff_rescale 0.0247 cle 0.0227 tap 0.2210 COMB 0.0391
24 ID Sequence pep ACAHYKDPP aff 0.0084 aff_rescale 0.0159 cle 0.0235 tap 0.3330 COMB 0.0361
25 ID Sequence pep CAHYKDPPF aff 0.0196 aff_rescale 0.0369 cle 0.4565 tap 2.7300 COMB 0.2419
26 ID Sequence pep AHYKDPPFC aff 0.0112 aff_rescale 0.0211 cle 0.0316 tap 0.3460 COMB 0.0432
27 ID Sequence pep HYKDPPFCV aff 0.0165 aff_rescale 0.0311 cle 0.9763 tap 0.6400 COMB 0.2096
28 ID Sequence pep YKDPPFCVA aff 0.0074 aff_rescale 0.0139 cle 0.9600 tap -0.7050 COMB 0.1226
29 ID Sequence pep KDPPFCVAR aff 0.0371 aff_rescale 0.0699 cle 0.8817 tap 1.2170 COMB 0.2630
30 ID Sequence pep DPPFCVARC aff 0.0068 aff_rescale 0.0127 cle 0.0606 tap -0.5200 COMB -0.0042
31 ID Sequence pep PPFCVARCP aff 0.0088 aff_rescale 0.0165 cle 0.1708 tap -0.7070 COMB 0.0068
32 ID Sequence pep PFCVARCPS aff 0.0075 aff_rescale 0.0141 cle 0.0274 tap -2.6940 COMB -0.1165
33 ID Sequence pep FCVARCPSG aff 0.0102 aff_rescale 0.0192 cle 0.0263 tap -1.5370 COMB -0.0537
34 ID Sequence pep CVARCPSGV aff 0.0448 aff_rescale 0.0843 cle 0.3335 tap 0.3240 COMB 0.1506
35 ID Sequence pep VARCPSGVK aff 0.4164 aff_rescale 0.7837 cle 0.2690 tap 0.6210 COMB 0.8551 <-E
36 ID Sequence pep ARCPSGVKP aff 0.0083 aff_rescale 0.0156 cle 0.0694 tap 0.5110 COMB 0.0516
37 ID Sequence pep RCPSGVKPD aff 0.0142 aff_rescale 0.0267 cle 0.0256 tap -1.4120 COMB -0.0400
38 ID Sequence pep CPSGVKPDL aff 0.0086 aff_rescale 0.0163 cle 0.8562 tap 0.7370 COMB 0.1815
39 ID Sequence pep PSGVKPDLS aff 0.0088 aff_rescale 0.0165 cle 0.0230 tap -2.8550 COMB -0.1228
40 ID Sequence pep SGVKPDLSY aff 0.0460 aff_rescale 0.0867 cle 0.7732 tap 2.6440 COMB 0.3348
41 ID Sequence pep GVKPDLSYM aff 0.0404 aff_rescale 0.0760 cle 0.8246 tap 0.3160 COMB 0.2154
42 ID Sequence pep VKPDLSYMP aff 0.0094 aff_rescale 0.0176 cle 0.0363 tap 0.1710 COMB 0.0316
43 ID Sequence pep KPDLSYMPI aff 0.0136 aff_rescale 0.0256 cle 0.9457 tap 0.2080 COMB 0.1779
44 ID Sequence pep PDLSYMPIW aff 0.0086 aff_rescale 0.0162 cle 0.9325 tap 0.2160 COMB 0.1669
45 ID Sequence pep DLSYMPIWK aff 0.3558 aff_rescale 0.6697 cle 0.4285 tap 0.0190 COMB 0.7349
46 ID Sequence pep LSYMPIWKF aff 0.0751 aff_rescale 0.1414 cle 0.8074 tap 2.6270 COMB 0.3939
47 ID Sequence pep SYMPIWKFP aff 0.0180 aff_rescale 0.0338 cle 0.0569 tap 0.5350 COMB 0.0691
48 ID Sequence pep YMPIWKFPD aff 0.0154 aff_rescale 0.0289 cle 0.1287 tap -1.6750 COMB -0.0355
49 ID Sequence pep MPIWKFPDE aff 0.0151 aff_rescale 0.0285 cle 0.5043 tap -1.8060 COMB 0.0139
50 ID Sequence pep PIWKFPDEE aff 0.0085 aff_rescale 0.0161 cle 0.2338 tap -1.7090 COMB -0.0343
51 ID Sequence pep IWKFPDEEG aff 0.0068 aff_rescale 0.0128 cle 0.1752 tap -1.2730 COMB -0.0246
52 ID Sequence pep WKFPDEEGA aff 0.0067 aff_rescale 0.0126 cle 0.1004 tap -0.3920 COMB 0.0080
53 ID Sequence pep KFPDEEGAC aff 0.0078 aff_rescale 0.0147 cle 0.0476 tap 0.2180 COMB 0.0328
54 ID Sequence pep FPDEEGACQ aff 0.0091 aff_rescale 0.0172 cle 0.1122 tap -0.5800 COMB 0.0050
55 ID Sequence pep PDEEGACQP aff 0.0066 aff_rescale 0.0125 cle 0.0360 tap -0.9320 COMB -0.0287
56 ID Sequence pep DEEGACQPC aff 0.0066 aff_rescale 0.0123 cle 0.0268 tap -0.7260 COMB -0.0199
57 ID Sequence pep EEGACQPCP aff 0.0080 aff_rescale 0.0151 cle 0.0246 tap -0.5370 COMB -0.0080
58 ID Sequence pep EGACQPCPI aff 0.0088 aff_rescale 0.0165 cle 0.1443 tap -0.0860 COMB 0.0338
59 ID Sequence pep GACQPCPIN aff 0.0181 aff_rescale 0.0340 cle 0.0336 tap -1.6000 COMB -0.0410
60 ID Sequence pep ACQPCPINC aff 0.0090 aff_rescale 0.0170 cle 0.0235 tap 0.1170 COMB 0.0264
61 ID Sequence pep CQPCPINCT aff 0.0110 aff_rescale 0.0206 cle 0.1787 tap -0.5320 COMB 0.0208
62 ID Sequence pep QPCPINCTH aff 0.0149 aff_rescale 0.0280 cle 0.9102 tap -0.8250 COMB 0.1233
63 ID Sequence pep PCPINCTHS aff 0.0079 aff_rescale 0.0149 cle 0.1806 tap -2.7690 COMB -0.0965
64 ID Sequence pep CPINCTHSC aff 0.0091 aff_rescale 0.0172 cle 0.0637 tap -0.4070 COMB 0.0064
65 ID Sequence pep PINCTHSCV aff 0.0183 aff_rescale 0.0345 cle 0.9611 tap -0.1380 COMB 0.1718
66 ID Sequence pep INCTHSCVD aff 0.0097 aff_rescale 0.0183 cle 0.0319 tap -2.0810 COMB -0.0810
67 ID Sequence pep NCTHSCVDL aff 0.0104 aff_rescale 0.0196 cle 0.5220 tap 0.9850 COMB 0.1471
68 ID Sequence pep CTHSCVDLD aff 0.0159 aff_rescale 0.0300 cle 0.0237 tap -1.7070 COMB -0.0518
69 ID Sequence pep THSCVDLDD aff 0.0081 aff_rescale 0.0153 cle 0.0626 tap -1.8400 COMB -0.0673
70 ID Sequence pep HSCVDLDDK aff 0.1023 aff_rescale 0.1925 cle 0.1675 tap 0.4330 COMB 0.2393
71 ID Sequence pep SCVDLDDKG aff 0.0067 aff_rescale 0.0127 cle 0.0337 tap -1.2670 COMB -0.0456
72 ID Sequence pep CVDLDDKGC aff 0.0074 aff_rescale 0.0140 cle 0.0279 tap -0.0100 COMB 0.0177
73 ID Sequence pep VDLDDKGCP aff 0.0072 aff_rescale 0.0136 cle 0.0368 tap -0.1300 COMB 0.0126
74 ID Sequence pep DLDDKGCPA aff 0.0106 aff_rescale 0.0199 cle 0.8155 tap -0.9610 COMB 0.0941
75 ID Sequence pep LDDKGCPAE aff 0.0103 aff_rescale 0.0194 cle 0.0997 tap -2.1840 COMB -0.0749
76 ID Sequence pep DDKGCPAEQ aff 0.0072 aff_rescale 0.0136 cle 0.3422 tap -0.6830 COMB 0.0307
77 ID Sequence pep DKGCPAEQR aff 0.0208 aff_rescale 0.0391 cle 0.4259 tap 0.9160 COMB 0.1488
78 ID Sequence pep KGCPAEQRA aff 0.0109 aff_rescale 0.0205 cle 0.2496 tap -0.8250 COMB 0.0167
79 ID Sequence pep GCPAEQRAS aff 0.0088 aff_rescale 0.0166 cle 0.0242 tap -2.3180 COMB -0.0957
80 ID Sequence pep CPAEQRASP aff 0.0098 aff_rescale 0.0185 cle 0.3231 tap -0.2540 COMB 0.0543
81 ID Sequence pep PAEQRASPL aff 0.0092 aff_rescale 0.0174 cle 0.9247 tap 0.3760 COMB 0.1749
82 ID Sequence pep AEQRASPLT aff 0.0127 aff_rescale 0.0239 cle 0.2007 tap -0.8740 COMB 0.0103
83 ID Sequence pep EQRASPLTG aff 0.0132 aff_rescale 0.0249 cle 0.1196 tap -1.3210 COMB -0.0233
84 ID Sequence pep QRASPLTGG aff 0.0081 aff_rescale 0.0153 cle 0.2416 tap -1.3260 COMB -0.0148
85 ID Sequence pep RASPLTGGG aff 0.0235 aff_rescale 0.0442 cle 0.0749 tap -1.1520 COMB -0.0022
86 ID Sequence pep ASPLTGGGS aff 0.0146 aff_rescale 0.0276 cle 0.0276 tap -1.9440 COMB -0.0655
87 ID Sequence pep SPLTGGGSG aff 0.0087 aff_rescale 0.0164 cle 0.4658 tap -1.4750 COMB 0.0125
88 ID Sequence pep PLTGGGSGG aff 0.0110 aff_rescale 0.0206 cle 0.0305 tap -1.8380 COMB -0.0667
89 ID Sequence pep LTGGGSGGG aff 0.0142 aff_rescale 0.0268 cle 0.0267 tap -1.7210 COMB -0.0553
90 ID Sequence pep TGGGSGGGS aff 0.0105 aff_rescale 0.0198 cle 0.0238 tap -2.6480 COMB -0.1090
91 ID Sequence pep GGGSGGGSI aff 0.0103 aff_rescale 0.0194 cle 0.0773 tap -0.0640 COMB 0.0278
92 ID Sequence pep GGSGGGSII aff 0.0105 aff_rescale 0.0199 cle 0.2937 tap 0.0550 COMB 0.0667
93 ID Sequence pep GSGGGSIIS aff 0.0319 aff_rescale 0.0601 cle 0.0470 tap -2.5770 COMB -0.0617
94 ID Sequence pep SGGGSIISA aff 0.0187 aff_rescale 0.0353 cle 0.0816 tap -0.9420 COMB 0.0004
95 ID Sequence pep GGGSIISAV aff 0.0124 aff_rescale 0.0233 cle 0.1279 tap -0.2400 COMB 0.0305
96 ID Sequence pep GGSIISAVV aff 0.0114 aff_rescale 0.0215 cle 0.4797 tap -0.1650 COMB 0.0852
97 ID Sequence pep GSIISAVVG aff 0.0173 aff_rescale 0.0326 cle 0.0237 tap -1.4950 COMB -0.0386
98 ID Sequence pep SIISAVVGI aff 0.0304 aff_rescale 0.0573 cle 0.1874 tap 0.7550 COMB 0.1231
99 ID Sequence pep IISAVVGIL aff 0.0715 aff_rescale 0.1346 cle 0.5148 tap 1.1560 COMB 0.2697
100 ID Sequence pep ISAVVGILL aff 0.0986 aff_rescale 0.1856 cle 0.2648 tap 1.0440 COMB 0.2775
101 ID Sequence pep SAVVGILLV aff 0.0390 aff_rescale 0.0734 cle 0.3325 tap 0.5070 COMB 0.1487
102 ID Sequence pep AVVGILLVV aff 0.0951 aff_rescale 0.1789 cle 0.7946 tap 0.7290 COMB 0.3345
103 ID Sequence pep VVGILLVVV aff 0.0304 aff_rescale 0.0572 cle 0.2172 tap 0.5060 COMB 0.1151
104 ID Sequence pep VGILLVVVL aff 0.0110 aff_rescale 0.0207 cle 0.3706 tap 0.8660 COMB 0.1196
105 ID Sequence pep GILLVVVLG aff 0.0373 aff_rescale 0.0702 cle 0.0384 tap -1.3810 COMB 0.0069
106 ID Sequence pep ILLVVVLGV aff 0.0890 aff_rescale 0.1674 cle 0.5281 tap 0.3450 COMB 0.2639
107 ID Sequence pep LLVVVLGVV aff 0.0303 aff_rescale 0.0570 cle 0.5579 tap 0.4250 COMB 0.1620
108 ID Sequence pep LVVVLGVVF aff 0.0287 aff_rescale 0.0540 cle 0.4182 tap 2.8030 COMB 0.2569
109 ID Sequence pep VVVLGVVFG aff 0.0281 aff_rescale 0.0528 cle 0.0557 tap -1.0690 COMB 0.0077
110 ID Sequence pep VVLGVVFGI aff 0.0497 aff_rescale 0.0935 cle 0.8816 tap 0.8000 COMB 0.2657
111 ID Sequence pep VLGVVFGIL aff 0.0366 aff_rescale 0.0689 cle 0.8738 tap 0.9200 COMB 0.2460
112 ID Sequence pep LGVVFGILI aff 0.0110 aff_rescale 0.0207 cle 0.5499 tap 0.3970 COMB 0.1230

## Sheet: A24
NetCTL-1.2 predictions using MHC supertype A24. Threshold 0.750000
1 ID Sequence pep CHPECQPQN aff 0.0137 aff_rescale 0.0291 cle 0.0496 tap -1.3660 COMB -0.0317
2 ID Sequence pep HPECQPQNG aff 0.0076 aff_rescale 0.0162 cle 0.1474 tap -1.9420 COMB -0.0588
3 ID Sequence pep PECQPQNGS aff 0.0062 aff_rescale 0.0132 cle 0.0345 tap -2.8750 COMB -0.1254
4 ID Sequence pep ECQPQNGSV aff 0.0193 aff_rescale 0.0412 cle 0.3696 tap -0.0460 COMB 0.0943
5 ID Sequence pep CQPQNGSVT aff 0.0233 aff_rescale 0.0496 cle 0.1895 tap -0.8530 COMB 0.0354
6 ID Sequence pep QPQNGSVTC aff 0.0108 aff_rescale 0.0231 cle 0.5316 tap -0.3160 COMB 0.0870
7 ID Sequence pep PQNGSVTCF aff 0.1305 aff_rescale 0.2779 cle 0.8712 tap 1.9870 COMB 0.5079
8 ID Sequence pep QNGSVTCFG aff 0.0099 aff_rescale 0.0211 cle 0.0275 tap -1.8430 COMB -0.0669
9 ID Sequence pep NGSVTCFGP aff 0.0098 aff_rescale 0.0209 cle 0.0372 tap -0.1780 COMB 0.0176
10 ID Sequence pep GSVTCFGPE aff 0.0150 aff_rescale 0.0319 cle 0.0246 tap -1.4850 COMB -0.0387
11 ID Sequence pep SVTCFGPEA aff 0.0143 aff_rescale 0.0305 cle 0.2948 tap -0.4100 COMB 0.0542
12 ID Sequence pep VTCFGPEAD aff 0.0121 aff_rescale 0.0258 cle 0.0278 tap -1.7120 COMB -0.0556
13 ID Sequence pep TCFGPEADQ aff 0.0110 aff_rescale 0.0235 cle 0.0547 tap 0.0530 COMB 0.0343
14 ID Sequence pep CFGPEADQC aff 0.0246 aff_rescale 0.0525 cle 0.0230 tap -0.0120 COMB 0.0553
15 ID Sequence pep FGPEADQCV aff 0.0164 aff_rescale 0.0349 cle 0.8878 tap -0.0690 COMB 0.1646
16 ID Sequence pep GPEADQCVA aff 0.0079 aff_rescale 0.0167 cle 0.9401 tap -1.2680 COMB 0.0944
17 ID Sequence pep PEADQCVAC aff 0.0077 aff_rescale 0.0164 cle 0.0603 tap -0.6140 COMB -0.0053
18 ID Sequence pep EADQCVACA aff 0.0169 aff_rescale 0.0360 cle 0.2650 tap -1.0080 COMB 0.0253
19 ID Sequence pep ADQCVACAH aff 0.0082 aff_rescale 0.0174 cle 0.0688 tap -0.8980 COMB -0.0172
20 ID Sequence pep DQCVACAHY aff 0.0159 aff_rescale 0.0338 cle 0.9200 tap 2.8470 COMB 0.3142
21 ID Sequence pep QCVACAHYK aff 0.0217 aff_rescale 0.0462 cle 0.0686 tap 0.4370 COMB 0.0783
22 ID Sequence pep CVACAHYKD aff 0.0207 aff_rescale 0.0440 cle 0.0240 tap -1.7500 COMB -0.0399
23 ID Sequence pep VACAHYKDP aff 0.0119 aff_rescale 0.0254 cle 0.0227 tap 0.2210 COMB 0.0398
24 ID Sequence pep ACAHYKDPP aff 0.0101 aff_rescale 0.0215 cle 0.0235 tap 0.3330 COMB 0.0417
25 ID Sequence pep CAHYKDPPF aff 0.0799 aff_rescale 0.1702 cle 0.4565 tap 2.7300 COMB 0.3752
26 ID Sequence pep AHYKDPPFC aff 0.0248 aff_rescale 0.0527 cle 0.0316 tap 0.3460 COMB 0.0748
27 ID Sequence pep HYKDPPFCV aff 0.3246 aff_rescale 0.6912 cle 0.9763 tap 0.6400 COMB 0.8697 <-E
28 ID Sequence pep YKDPPFCVA aff 0.0105 aff_rescale 0.0223 cle 0.9600 tap -0.7050 COMB 0.1310
29 ID Sequence pep KDPPFCVAR aff 0.0116 aff_rescale 0.0248 cle 0.8817 tap 1.2170 COMB 0.2179
30 ID Sequence pep DPPFCVARC aff 0.0161 aff_rescale 0.0343 cle 0.0606 tap -0.5200 COMB 0.0174
31 ID Sequence pep PPFCVARCP aff 0.0092 aff_rescale 0.0196 cle 0.1708 tap -0.7070 COMB 0.0098
32 ID Sequence pep PFCVARCPS aff 0.0275 aff_rescale 0.0585 cle 0.0274 tap -2.6940 COMB -0.0721
33 ID Sequence pep FCVARCPSG aff 0.0108 aff_rescale 0.0229 cle 0.0263 tap -1.5370 COMB -0.0500
34 ID Sequence pep CVARCPSGV aff 0.0389 aff_rescale 0.0829 cle 0.3335 tap 0.3240 COMB 0.1492
35 ID Sequence pep VARCPSGVK aff 0.0233 aff_rescale 0.0497 cle 0.2690 tap 0.6210 COMB 0.1211
36 ID Sequence pep ARCPSGVKP aff 0.0083 aff_rescale 0.0178 cle 0.0694 tap 0.5110 COMB 0.0537
37 ID Sequence pep RCPSGVKPD aff 0.0101 aff_rescale 0.0215 cle 0.0256 tap -1.4120 COMB -0.0453
38 ID Sequence pep CPSGVKPDL aff 0.0222 aff_rescale 0.0472 cle 0.8562 tap 0.7370 COMB 0.2125
39 ID Sequence pep PSGVKPDLS aff 0.0191 aff_rescale 0.0406 cle 0.0230 tap -2.8550 COMB -0.0987
40 ID Sequence pep SGVKPDLSY aff 0.0084 aff_rescale 0.0179 cle 0.7732 tap 2.6440 COMB 0.2661
41 ID Sequence pep GVKPDLSYM aff 0.0178 aff_rescale 0.0379 cle 0.8246 tap 0.3160 COMB 0.1774
42 ID Sequence pep VKPDLSYMP aff 0.0245 aff_rescale 0.0521 cle 0.0363 tap 0.1710 COMB 0.0661
43 ID Sequence pep KPDLSYMPI aff 0.0554 aff_rescale 0.1179 cle 0.9457 tap 0.2080 COMB 0.2702
44 ID Sequence pep PDLSYMPIW aff 0.0165 aff_rescale 0.0352 cle 0.9325 tap 0.2160 COMB 0.1859
45 ID Sequence pep DLSYMPIWK aff 0.0520 aff_rescale 0.1107 cle 0.4285 tap 0.0190 COMB 0.1759
46 ID Sequence pep LSYMPIWKF aff 0.1298 aff_rescale 0.2764 cle 0.8074 tap 2.6270 COMB 0.5289
47 ID Sequence pep SYMPIWKFP aff 0.2706 aff_rescale 0.5762 cle 0.0569 tap 0.5350 COMB 0.6115
48 ID Sequence pep YMPIWKFPD aff 0.0294 aff_rescale 0.0626 cle 0.1287 tap -1.6750 COMB -0.0019
49 ID Sequence pep MPIWKFPDE aff 0.0168 aff_rescale 0.0357 cle 0.5043 tap -1.8060 COMB 0.0210
50 ID Sequence pep PIWKFPDEE aff 0.0137 aff_rescale 0.0292 cle 0.2338 tap -1.7090 COMB -0.0212
51 ID Sequence pep IWKFPDEEG aff 0.0237 aff_rescale 0.0506 cle 0.1752 tap -1.2730 COMB 0.0132
52 ID Sequence pep WKFPDEEGA aff 0.0077 aff_rescale 0.0164 cle 0.1004 tap -0.3920 COMB 0.0119
53 ID Sequence pep KFPDEEGAC aff 0.0441 aff_rescale 0.0939 cle 0.0476 tap 0.2180 COMB 0.1120
54 ID Sequence pep FPDEEGACQ aff 0.0085 aff_rescale 0.0180 cle 0.1122 tap -0.5800 COMB 0.0059
55 ID Sequence pep PDEEGACQP aff 0.0050 aff_rescale 0.0107 cle 0.0360 tap -0.9320 COMB -0.0305
56 ID Sequence pep DEEGACQPC aff 0.0070 aff_rescale 0.0149 cle 0.0268 tap -0.7260 COMB -0.0173
57 ID Sequence pep EEGACQPCP aff 0.0107 aff_rescale 0.0228 cle 0.0246 tap -0.5370 COMB -0.0003
58 ID Sequence pep EGACQPCPI aff 0.0533 aff_rescale 0.1136 cle 0.1443 tap -0.0860 COMB 0.1309
59 ID Sequence pep GACQPCPIN aff 0.0089 aff_rescale 0.0188 cle 0.0336 tap -1.6000 COMB -0.0561
60 ID Sequence pep ACQPCPINC aff 0.0167 aff_rescale 0.0355 cle 0.0235 tap 0.1170 COMB 0.0449
61 ID Sequence pep CQPCPINCT aff 0.0209 aff_rescale 0.0444 cle 0.1787 tap -0.5320 COMB 0.0446
62 ID Sequence pep QPCPINCTH aff 0.0114 aff_rescale 0.0242 cle 0.9102 tap -0.8250 COMB 0.1195
63 ID Sequence pep PCPINCTHS aff 0.0153 aff_rescale 0.0325 cle 0.1806 tap -2.7690 COMB -0.0789
64 ID Sequence pep CPINCTHSC aff 0.0171 aff_rescale 0.0364 cle 0.0637 tap -0.4070 COMB 0.0256
65 ID Sequence pep PINCTHSCV aff 0.0203 aff_rescale 0.0432 cle 0.9611 tap -0.1380 COMB 0.1805
66 ID Sequence pep INCTHSCVD aff 0.0168 aff_rescale 0.0357 cle 0.0319 tap -2.0810 COMB -0.0635
67 ID Sequence pep NCTHSCVDL aff 0.0191 aff_rescale 0.0407 cle 0.5220 tap 0.9850 COMB 0.1683
68 ID Sequence pep CTHSCVDLD aff 0.0343 aff_rescale 0.0730 cle 0.0237 tap -1.7070 COMB -0.0088
69 ID Sequence pep THSCVDLDD aff 0.0138 aff_rescale 0.0294 cle 0.0626 tap -1.8400 COMB -0.0532
70 ID Sequence pep HSCVDLDDK aff 0.0223 aff_rescale 0.0474 cle 0.1675 tap 0.4330 COMB 0.0942
71 ID Sequence pep SCVDLDDKG aff 0.0092 aff_rescale 0.0196 cle 0.0337 tap -1.2670 COMB -0.0387
72 ID Sequence pep CVDLDDKGC aff 0.0080 aff_rescale 0.0171 cle 0.0279 tap -0.0100 COMB 0.0208
73 ID Sequence pep VDLDDKGCP aff 0.0072 aff_rescale 0.0153 cle 0.0368 tap -0.1300 COMB 0.0144
74 ID Sequence pep DLDDKGCPA aff 0.0080 aff_rescale 0.0170 cle 0.8155 tap -0.9610 COMB 0.0913
75 ID Sequence pep LDDKGCPAE aff 0.0064 aff_rescale 0.0136 cle 0.0997 tap -2.1840 COMB -0.0806
76 ID Sequence pep DDKGCPAEQ aff 0.0087 aff_rescale 0.0186 cle 0.3422 tap -0.6830 COMB 0.0358
77 ID Sequence pep DKGCPAEQR aff 0.0085 aff_rescale 0.0182 cle 0.4259 tap 0.9160 COMB 0.1278
78 ID Sequence pep KGCPAEQRA aff 0.0092 aff_rescale 0.0197 cle 0.2496 tap -0.8250 COMB 0.0159
79 ID Sequence pep GCPAEQRAS aff 0.0095 aff_rescale 0.0202 cle 0.0242 tap -2.3180 COMB -0.0921
80 ID Sequence pep CPAEQRASP aff 0.0085 aff_rescale 0.0181 cle 0.3231 tap -0.2540 COMB 0.0538
81 ID Sequence pep PAEQRASPL aff 0.0210 aff_rescale 0.0448 cle 0.9247 tap 0.3760 COMB 0.2023
82 ID Sequence pep AEQRASPLT aff 0.0260 aff_rescale 0.0554 cle 0.2007 tap -0.8740 COMB 0.0418
83 ID Sequence pep EQRASPLTG aff 0.0218 aff_rescale 0.0465 cle 0.1196 tap -1.3210 COMB -0.0016
84 ID Sequence pep QRASPLTGG aff 0.0062 aff_rescale 0.0131 cle 0.2416 tap -1.3260 COMB -0.0169
85 ID Sequence pep RASPLTGGG aff 0.0109 aff_rescale 0.0232 cle 0.0749 tap -1.1520 COMB -0.0231
86 ID Sequence pep ASPLTGGGS aff 0.0158 aff_rescale 0.0336 cle 0.0276 tap -1.9440 COMB -0.0594
87 ID Sequence pep SPLTGGGSG aff 0.0093 aff_rescale 0.0199 cle 0.4658 tap -1.4750 COMB 0.0160
88 ID Sequence pep PLTGGGSGG aff 0.0063 aff_rescale 0.0134 cle 0.0305 tap -1.8380 COMB -0.0739
89 ID Sequence pep LTGGGSGGG aff 0.0087 aff_rescale 0.0186 cle 0.0267 tap -1.7210 COMB -0.0634
90 ID Sequence pep TGGGSGGGS aff 0.0068 aff_rescale 0.0144 cle 0.0238 tap -2.6480 COMB -0.1144
91 ID Sequence pep GGGSGGGSI aff 0.0124 aff_rescale 0.0264 cle 0.0773 tap -0.0640 COMB 0.0348
92 ID Sequence pep GGSGGGSII aff 0.0127 aff_rescale 0.0270 cle 0.2937 tap 0.0550 COMB 0.0738
93 ID Sequence pep GSGGGSIIS aff 0.0112 aff_rescale 0.0238 cle 0.0470 tap -2.5770 COMB -0.0980
94 ID Sequence pep SGGGSIISA aff 0.0092 aff_rescale 0.0196 cle 0.0816 tap -0.9420 COMB -0.0153
95 ID Sequence pep GGGSIISAV aff 0.0114 aff_rescale 0.0242 cle 0.1279 tap -0.2400 COMB 0.0314
96 ID Sequence pep GGSIISAVV aff 0.0128 aff_rescale 0.0273 cle 0.4797 tap -0.1650 COMB 0.0910
97 ID Sequence pep GSIISAVVG aff 0.0130 aff_rescale 0.0278 cle 0.0237 tap -1.4950 COMB -0.0434
98 ID Sequence pep SIISAVVGI aff 0.1082 aff_rescale 0.2305 cle 0.1874 tap 0.7550 COMB 0.2963
99 ID Sequence pep IISAVVGIL aff 0.0911 aff_rescale 0.1939 cle 0.5148 tap 1.1560 COMB 0.3290
100 ID Sequence pep ISAVVGILL aff 0.2265 aff_rescale 0.4823 cle 0.2648 tap 1.0440 COMB 0.5743
101 ID Sequence pep SAVVGILLV aff 0.0367 aff_rescale 0.0782 cle 0.3325 tap 0.5070 COMB 0.1534
102 ID Sequence pep AVVGILLVV aff 0.0503 aff_rescale 0.1070 cle 0.7946 tap 0.7290 COMB 0.2627
103 ID Sequence pep VVGILLVVV aff 0.0451 aff_rescale 0.0960 cle 0.2172 tap 0.5060 COMB 0.1538
104 ID Sequence pep VGILLVVVL aff 0.0607 aff_rescale 0.1292 cle 0.3706 tap 0.8660 COMB 0.2280
105 ID Sequence pep GILLVVVLG aff 0.0274 aff_rescale 0.0583 cle 0.0384 tap -1.3810 COMB -0.0049
106 ID Sequence pep ILLVVVLGV aff 0.0689 aff_rescale 0.1468 cle 0.5281 tap 0.3450 COMB 0.2432
107 ID Sequence pep LLVVVLGVV aff 0.0389 aff_rescale 0.0827 cle 0.5579 tap 0.4250 COMB 0.1877
108 ID Sequence pep LVVVLGVVF aff 0.1766 aff_rescale 0.3760 cle 0.4182 tap 2.8030 COMB 0.5789
109 ID Sequence pep VVVLGVVFG aff 0.0152 aff_rescale 0.0323 cle 0.0557 tap -1.0690 COMB -0.0128
110 ID Sequence pep VVLGVVFGI aff 0.2946 aff_rescale 0.6273 cle 0.8816 tap 0.8000 COMB 0.7995 <-E
111 ID Sequence pep VLGVVFGIL aff 0.1056 aff_rescale 0.2249 cle 0.8738 tap 0.9200 COMB 0.4020
112 ID Sequence pep LGVVFGILI aff 0.0459 aff_rescale 0.0978 cle 0.5499 tap 0.3970 COMB 0.2002

## Sheet: A26
NetCTL-1.2 predictions using MHC supertype A26. Threshold 0.750000
1 ID Sequence pep CHPECQPQN aff 0.0064 aff_rescale 0.0171 cle 0.0496 tap -1.3660 COMB -0.0437
2 ID Sequence pep HPECQPQNG aff 0.0045 aff_rescale 0.0122 cle 0.1474 tap -1.9420 COMB -0.0628
3 ID Sequence pep PECQPQNGS aff 0.0056 aff_rescale 0.0150 cle 0.0345 tap -2.8750 COMB -0.1236
4 ID Sequence pep ECQPQNGSV aff 0.0734 aff_rescale 0.1971 cle 0.3696 tap -0.0460 COMB 0.2502
5 ID Sequence pep CQPQNGSVT aff 0.0106 aff_rescale 0.0285 cle 0.1895 tap -0.8530 COMB 0.0142
6 ID Sequence pep QPQNGSVTC aff 0.0063 aff_rescale 0.0169 cle 0.5316 tap -0.3160 COMB 0.0809
7 ID Sequence pep PQNGSVTCF aff 0.0251 aff_rescale 0.0674 cle 0.8712 tap 1.9870 COMB 0.2974
8 ID Sequence pep QNGSVTCFG aff 0.0061 aff_rescale 0.0163 cle 0.0275 tap -1.8430 COMB -0.0717
9 ID Sequence pep NGSVTCFGP aff 0.0070 aff_rescale 0.0188 cle 0.0372 tap -0.1780 COMB 0.0155
10 ID Sequence pep GSVTCFGPE aff 0.0221 aff_rescale 0.0594 cle 0.0246 tap -1.4850 COMB -0.0111
11 ID Sequence pep SVTCFGPEA aff 0.0245 aff_rescale 0.0658 cle 0.2948 tap -0.4100 COMB 0.0895
12 ID Sequence pep VTCFGPEAD aff 0.0105 aff_rescale 0.0283 cle 0.0278 tap -1.7120 COMB -0.0531
13 ID Sequence pep TCFGPEADQ aff 0.0109 aff_rescale 0.0292 cle 0.0547 tap 0.0530 COMB 0.0401
14 ID Sequence pep CFGPEADQC aff 0.0047 aff_rescale 0.0127 cle 0.0230 tap -0.0120 COMB 0.0155
15 ID Sequence pep FGPEADQCV aff 0.0642 aff_rescale 0.1723 cle 0.8878 tap -0.0690 COMB 0.3020
16 ID Sequence pep GPEADQCVA aff 0.0049 aff_rescale 0.0132 cle 0.9401 tap -1.2680 COMB 0.0908
17 ID Sequence pep PEADQCVAC aff 0.0068 aff_rescale 0.0182 cle 0.0603 tap -0.6140 COMB -0.0035
18 ID Sequence pep EADQCVACA aff 0.0374 aff_rescale 0.1003 cle 0.2650 tap -1.0080 COMB 0.0897
19 ID Sequence pep ADQCVACAH aff 0.0094 aff_rescale 0.0251 cle 0.0688 tap -0.8980 COMB -0.0095
20 ID Sequence pep DQCVACAHY aff 0.0759 aff_rescale 0.2036 cle 0.9200 tap 2.8470 COMB 0.4839
21 ID Sequence pep QCVACAHYK aff 0.0157 aff_rescale 0.0421 cle 0.0686 tap 0.4370 COMB 0.0742
22 ID Sequence pep CVACAHYKD aff 0.0090 aff_rescale 0.0241 cle 0.0240 tap -1.7500 COMB -0.0598
23 ID Sequence pep VACAHYKDP aff 0.0057 aff_rescale 0.0154 cle 0.0227 tap 0.2210 COMB 0.0298
24 ID Sequence pep ACAHYKDPP aff 0.0095 aff_rescale 0.0255 cle 0.0235 tap 0.3330 COMB 0.0457
25 ID Sequence pep CAHYKDPPF aff 0.0284 aff_rescale 0.0762 cle 0.4565 tap 2.7300 COMB 0.2812
26 ID Sequence pep AHYKDPPFC aff 0.0064 aff_rescale 0.0173 cle 0.0316 tap 0.3460 COMB 0.0393
27 ID Sequence pep HYKDPPFCV aff 0.0156 aff_rescale 0.0419 cle 0.9763 tap 0.6400 COMB 0.2204
28 ID Sequence pep YKDPPFCVA aff 0.0055 aff_rescale 0.0149 cle 0.9600 tap -0.7050 COMB 0.1236
29 ID Sequence pep KDPPFCVAR aff 0.0058 aff_rescale 0.0155 cle 0.8817 tap 1.2170 COMB 0.2086
30 ID Sequence pep DPPFCVARC aff 0.0209 aff_rescale 0.0560 cle 0.0606 tap -0.5200 COMB 0.0391
31 ID Sequence pep PPFCVARCP aff 0.0051 aff_rescale 0.0136 cle 0.1708 tap -0.7070 COMB 0.0039
32 ID Sequence pep PFCVARCPS aff 0.0052 aff_rescale 0.0139 cle 0.0274 tap -2.6940 COMB -0.1167
33 ID Sequence pep FCVARCPSG aff 0.0138 aff_rescale 0.0370 cle 0.0263 tap -1.5370 COMB -0.0359
34 ID Sequence pep CVARCPSGV aff 0.0525 aff_rescale 0.1410 cle 0.3335 tap 0.3240 COMB 0.2072
35 ID Sequence pep VARCPSGVK aff 0.0050 aff_rescale 0.0134 cle 0.2690 tap 0.6210 COMB 0.0848
36 ID Sequence pep ARCPSGVKP aff 0.0050 aff_rescale 0.0135 cle 0.0694 tap 0.5110 COMB 0.0495
37 ID Sequence pep RCPSGVKPD aff 0.0086 aff_rescale 0.0230 cle 0.0256 tap -1.4120 COMB -0.0437
38 ID Sequence pep CPSGVKPDL aff 0.0100 aff_rescale 0.0269 cle 0.8562 tap 0.7370 COMB 0.1921
39 ID Sequence pep PSGVKPDLS aff 0.0049 aff_rescale 0.0132 cle 0.0230 tap -2.8550 COMB -0.1261
40 ID Sequence pep SGVKPDLSY aff 0.1607 aff_rescale 0.4313 cle 0.7732 tap 2.6440 COMB 0.6795
41 ID Sequence pep GVKPDLSYM aff 0.2178 aff_rescale 0.5844 cle 0.8246 tap 0.3160 COMB 0.7239
42 ID Sequence pep VKPDLSYMP aff 0.0076 aff_rescale 0.0203 cle 0.0363 tap 0.1710 COMB 0.0343
43 ID Sequence pep KPDLSYMPI aff 0.0059 aff_rescale 0.0159 cle 0.9457 tap 0.2080 COMB 0.1682
44 ID Sequence pep PDLSYMPIW aff 0.0117 aff_rescale 0.0315 cle 0.9325 tap 0.2160 COMB 0.1822
45 ID Sequence pep DLSYMPIWK aff 0.0133 aff_rescale 0.0358 cle 0.4285 tap 0.0190 COMB 0.1010
46 ID Sequence pep LSYMPIWKF aff 0.0477 aff_rescale 0.1281 cle 0.8074 tap 2.6270 COMB 0.3806
47 ID Sequence pep SYMPIWKFP aff 0.0100 aff_rescale 0.0268 cle 0.0569 tap 0.5350 COMB 0.0621
48 ID Sequence pep YMPIWKFPD aff 0.0158 aff_rescale 0.0423 cle 0.1287 tap -1.6750 COMB -0.0221
49 ID Sequence pep MPIWKFPDE aff 0.0123 aff_rescale 0.0330 cle 0.5043 tap -1.8060 COMB 0.0184
50 ID Sequence pep PIWKFPDEE aff 0.0142 aff_rescale 0.0381 cle 0.2338 tap -1.7090 COMB -0.0123
51 ID Sequence pep IWKFPDEEG aff 0.0044 aff_rescale 0.0117 cle 0.1752 tap -1.2730 COMB -0.0256
52 ID Sequence pep WKFPDEEGA aff 0.0090 aff_rescale 0.0241 cle 0.1004 tap -0.3920 COMB 0.0196
53 ID Sequence pep KFPDEEGAC aff 0.0110 aff_rescale 0.0296 cle 0.0476 tap 0.2180 COMB 0.0476
54 ID Sequence pep FPDEEGACQ aff 0.0109 aff_rescale 0.0291 cle 0.1122 tap -0.5800 COMB 0.0170
55 ID Sequence pep PDEEGACQP aff 0.0049 aff_rescale 0.0133 cle 0.0360 tap -0.9320 COMB -0.0279
56 ID Sequence pep DEEGACQPC aff 0.0076 aff_rescale 0.0203 cle 0.0268 tap -0.7260 COMB -0.0120
57 ID Sequence pep EEGACQPCP aff 0.0095 aff_rescale 0.0255 cle 0.0246 tap -0.5370 COMB 0.0024
58 ID Sequence pep EGACQPCPI aff 0.0293 aff_rescale 0.0787 cle 0.1443 tap -0.0860 COMB 0.0961
59 ID Sequence pep GACQPCPIN aff 0.0060 aff_rescale 0.0160 cle 0.0336 tap -1.6000 COMB -0.0589
60 ID Sequence pep ACQPCPINC aff 0.0053 aff_rescale 0.0142 cle 0.0235 tap 0.1170 COMB 0.0236
61 ID Sequence pep CQPCPINCT aff 0.0079 aff_rescale 0.0212 cle 0.1787 tap -0.5320 COMB 0.0214
62 ID Sequence pep QPCPINCTH aff 0.0117 aff_rescale 0.0314 cle 0.9102 tap -0.8250 COMB 0.1267
63 ID Sequence pep PCPINCTHS aff 0.0084 aff_rescale 0.0225 cle 0.1806 tap -2.7690 COMB -0.0889
64 ID Sequence pep CPINCTHSC aff 0.0159 aff_rescale 0.0426 cle 0.0637 tap -0.4070 COMB 0.0318
65 ID Sequence pep PINCTHSCV aff 0.0189 aff_rescale 0.0507 cle 0.9611 tap -0.1380 COMB 0.1880
66 ID Sequence pep INCTHSCVD aff 0.0050 aff_rescale 0.0134 cle 0.0319 tap -2.0810 COMB -0.0858
67 ID Sequence pep NCTHSCVDL aff 0.0162 aff_rescale 0.0435 cle 0.5220 tap 0.9850 COMB 0.1711
68 ID Sequence pep CTHSCVDLD aff 0.0150 aff_rescale 0.0403 cle 0.0237 tap -1.7070 COMB -0.0415
69 ID Sequence pep THSCVDLDD aff 0.0045 aff_rescale 0.0120 cle 0.0626 tap -1.8400 COMB -0.0706
70 ID Sequence pep HSCVDLDDK aff 0.0078 aff_rescale 0.0210 cle 0.1675 tap 0.4330 COMB 0.0677
71 ID Sequence pep SCVDLDDKG aff 0.0179 aff_rescale 0.0481 cle 0.0337 tap -1.2670 COMB -0.0102
72 ID Sequence pep CVDLDDKGC aff 0.0076 aff_rescale 0.0205 cle 0.0279 tap -0.0100 COMB 0.0242
73 ID Sequence pep VDLDDKGCP aff 0.0059 aff_rescale 0.0159 cle 0.0368 tap -0.1300 COMB 0.0149
74 ID Sequence pep DLDDKGCPA aff 0.0237 aff_rescale 0.0635 cle 0.8155 tap -0.9610 COMB 0.1378
75 ID Sequence pep LDDKGCPAE aff 0.0070 aff_rescale 0.0187 cle 0.0997 tap -2.1840 COMB -0.0755
76 ID Sequence pep DDKGCPAEQ aff 0.0120 aff_rescale 0.0321 cle 0.3422 tap -0.6830 COMB 0.0493
77 ID Sequence pep DKGCPAEQR aff 0.0050 aff_rescale 0.0134 cle 0.4259 tap 0.9160 COMB 0.1231
78 ID Sequence pep KGCPAEQRA aff 0.0060 aff_rescale 0.0160 cle 0.2496 tap -0.8250 COMB 0.0122
79 ID Sequence pep GCPAEQRAS aff 0.0087 aff_rescale 0.0234 cle 0.0242 tap -2.3180 COMB -0.0889
80 ID Sequence pep CPAEQRASP aff 0.0093 aff_rescale 0.0250 cle 0.3231 tap -0.2540 COMB 0.0608
81 ID Sequence pep PAEQRASPL aff 0.0141 aff_rescale 0.0378 cle 0.9247 tap 0.3760 COMB 0.1953
82 ID Sequence pep AEQRASPLT aff 0.0072 aff_rescale 0.0194 cle 0.2007 tap -0.8740 COMB 0.0058
83 ID Sequence pep EQRASPLTG aff 0.0069 aff_rescale 0.0186 cle 0.1196 tap -1.3210 COMB -0.0295
84 ID Sequence pep QRASPLTGG aff 0.0064 aff_rescale 0.0172 cle 0.2416 tap -1.3260 COMB -0.0128
85 ID Sequence pep RASPLTGGG aff 0.0060 aff_rescale 0.0160 cle 0.0749 tap -1.1520 COMB -0.0304
86 ID Sequence pep ASPLTGGGS aff 0.0321 aff_rescale 0.0860 cle 0.0276 tap -1.9440 COMB -0.0070
87 ID Sequence pep SPLTGGGSG aff 0.0077 aff_rescale 0.0206 cle 0.4658 tap -1.4750 COMB 0.0167
88 ID Sequence pep PLTGGGSGG aff 0.0111 aff_rescale 0.0299 cle 0.0305 tap -1.8380 COMB -0.0575
89 ID Sequence pep LTGGGSGGG aff 0.0180 aff_rescale 0.0483 cle 0.0267 tap -1.7210 COMB -0.0338
90 ID Sequence pep TGGGSGGGS aff 0.0137 aff_rescale 0.0369 cle 0.0238 tap -2.6480 COMB -0.0920
91 ID Sequence pep GGGSGGGSI aff 0.0109 aff_rescale 0.0292 cle 0.0773 tap -0.0640 COMB 0.0375
92 ID Sequence pep GGSGGGSII aff 0.0128 aff_rescale 0.0342 cle 0.2937 tap 0.0550 COMB 0.0810
93 ID Sequence pep GSGGGSIIS aff 0.0077 aff_rescale 0.0206 cle 0.0470 tap -2.5770 COMB -0.1012
94 ID Sequence pep SGGGSIISA aff 0.0173 aff_rescale 0.0465 cle 0.0816 tap -0.9420 COMB 0.0116
95 ID Sequence pep GGGSIISAV aff 0.0158 aff_rescale 0.0423 cle 0.1279 tap -0.2400 COMB 0.0495
96 ID Sequence pep GGSIISAVV aff 0.0080 aff_rescale 0.0213 cle 0.4797 tap -0.1650 COMB 0.0850
97 ID Sequence pep GSIISAVVG aff 0.0064 aff_rescale 0.0173 cle 0.0237 tap -1.4950 COMB -0.0539
98 ID Sequence pep SIISAVVGI aff 0.3105 aff_rescale 0.8332 cle 0.1874 tap 0.7550 COMB 0.8990 <-E
99 ID Sequence pep IISAVVGIL aff 0.0560 aff_rescale 0.1503 cle 0.5148 tap 1.1560 COMB 0.2853
100 ID Sequence pep ISAVVGILL aff 0.0302 aff_rescale 0.0811 cle 0.2648 tap 1.0440 COMB 0.1731
101 ID Sequence pep SAVVGILLV aff 0.0936 aff_rescale 0.2511 cle 0.3325 tap 0.5070 COMB 0.3264
102 ID Sequence pep AVVGILLVV aff 0.1814 aff_rescale 0.4867 cle 0.7946 tap 0.7290 COMB 0.6424
103 ID Sequence pep VVGILLVVV aff 0.0186 aff_rescale 0.0498 cle 0.2172 tap 0.5060 COMB 0.1077
104 ID Sequence pep VGILLVVVL aff 0.0282 aff_rescale 0.0756 cle 0.3706 tap 0.8660 COMB 0.1745
105 ID Sequence pep GILLVVVLG aff 0.0114 aff_rescale 0.0305 cle 0.0384 tap -1.3810 COMB -0.0328
106 ID Sequence pep ILLVVVLGV aff 0.0258 aff_rescale 0.0692 cle 0.5281 tap 0.3450 COMB 0.1656
107 ID Sequence pep LLVVVLGVV aff 0.0407 aff_rescale 0.1093 cle 0.5579 tap 0.4250 COMB 0.2143
108 ID Sequence pep LVVVLGVVF aff 0.0630 aff_rescale 0.1692 cle 0.4182 tap 2.8030 COMB 0.3721
109 ID Sequence pep VVVLGVVFG aff 0.0265 aff_rescale 0.0712 cle 0.0557 tap -1.0690 COMB 0.0261
110 ID Sequence pep VVLGVVFGI aff 0.0894 aff_rescale 0.2399 cle 0.8816 tap 0.8000 COMB 0.4122
111 ID Sequence pep VLGVVFGIL aff 0.0172 aff_rescale 0.0463 cle 0.8738 tap 0.9200 COMB 0.2234
112 ID Sequence pep LGVVFGILI aff 0.0159 aff_rescale 0.0426 cle 0.5499 tap 0.3970 COMB 0.1449

## Sheet: B7
NetCTL-1.2 predictions using MHC supertype B7. Threshold 0.750000
1 ID Sequence pep CHPECQPQN aff 0.0110 aff_rescale 0.0211 cle 0.0496 tap -1.3660 COMB -0.0397
2 ID Sequence pep HPECQPQNG aff 0.0518 aff_rescale 0.1000 cle 0.1474 tap -1.9420 COMB 0.0250
3 ID Sequence pep PECQPQNGS aff 0.0090 aff_rescale 0.0175 cle 0.0345 tap -2.8750 COMB -0.1211
4 ID Sequence pep ECQPQNGSV aff 0.0341 aff_rescale 0.0657 cle 0.3696 tap -0.0460 COMB 0.1189
5 ID Sequence pep CQPQNGSVT aff 0.0240 aff_rescale 0.0463 cle 0.1895 tap -0.8530 COMB 0.0321
6 ID Sequence pep QPQNGSVTC aff 0.3821 aff_rescale 0.7371 cle 0.5316 tap -0.3160 COMB 0.8010 <-E
7 ID Sequence pep PQNGSVTCF aff 0.0204 aff_rescale 0.0393 cle 0.8712 tap 1.9870 COMB 0.2693
8 ID Sequence pep QNGSVTCFG aff 0.0125 aff_rescale 0.0241 cle 0.0275 tap -1.8430 COMB -0.0639
9 ID Sequence pep NGSVTCFGP aff 0.0132 aff_rescale 0.0254 cle 0.0372 tap -0.1780 COMB 0.0221
10 ID Sequence pep GSVTCFGPE aff 0.0211 aff_rescale 0.0407 cle 0.0246 tap -1.4850 COMB -0.0299
11 ID Sequence pep SVTCFGPEA aff 0.0440 aff_rescale 0.0849 cle 0.2948 tap -0.4100 COMB 0.1086
12 ID Sequence pep VTCFGPEAD aff 0.0168 aff_rescale 0.0324 cle 0.0278 tap -1.7120 COMB -0.0490
13 ID Sequence pep TCFGPEADQ aff 0.0147 aff_rescale 0.0284 cle 0.0547 tap 0.0530 COMB 0.0393
14 ID Sequence pep CFGPEADQC aff 0.0136 aff_rescale 0.0263 cle 0.0230 tap -0.0120 COMB 0.0292
15 ID Sequence pep FGPEADQCV aff 0.0224 aff_rescale 0.0433 cle 0.8878 tap -0.0690 COMB 0.1730
16 ID Sequence pep GPEADQCVA aff 0.2056 aff_rescale 0.3966 cle 0.9401 tap -1.2680 COMB 0.4742
17 ID Sequence pep PEADQCVAC aff 0.0171 aff_rescale 0.0330 cle 0.0603 tap -0.6140 COMB 0.0114
18 ID Sequence pep EADQCVACA aff 0.0242 aff_rescale 0.0467 cle 0.2650 tap -1.0080 COMB 0.0360
19 ID Sequence pep ADQCVACAH aff 0.0219 aff_rescale 0.0423 cle 0.0688 tap -0.8980 COMB 0.0077
20 ID Sequence pep DQCVACAHY aff 0.0094 aff_rescale 0.0182 cle 0.9200 tap 2.8470 COMB 0.2986
21 ID Sequence pep QCVACAHYK aff 0.0126 aff_rescale 0.0242 cle 0.0686 tap 0.4370 COMB 0.0564
22 ID Sequence pep CVACAHYKD aff 0.0177 aff_rescale 0.0341 cle 0.0240 tap -1.7500 COMB -0.0498
23 ID Sequence pep VACAHYKDP aff 0.0141 aff_rescale 0.0271 cle 0.0227 tap 0.2210 COMB 0.0416
24 ID Sequence pep ACAHYKDPP aff 0.0299 aff_rescale 0.0577 cle 0.0235 tap 0.3330 COMB 0.0778
25 ID Sequence pep CAHYKDPPF aff 0.0588 aff_rescale 0.1133 cle 0.4565 tap 2.7300 COMB 0.3183
26 ID Sequence pep AHYKDPPFC aff 0.0209 aff_rescale 0.0403 cle 0.0316 tap 0.3460 COMB 0.0624
27 ID Sequence pep HYKDPPFCV aff 0.0268 aff_rescale 0.0518 cle 0.9763 tap 0.6400 COMB 0.2302
28 ID Sequence pep YKDPPFCVA aff 0.0283 aff_rescale 0.0545 cle 0.9600 tap -0.7050 COMB 0.1633
29 ID Sequence pep KDPPFCVAR aff 0.0226 aff_rescale 0.0436 cle 0.8817 tap 1.2170 COMB 0.2367
30 ID Sequence pep DPPFCVARC aff 0.0820 aff_rescale 0.1581 cle 0.0606 tap -0.5200 COMB 0.1412
31 ID Sequence pep PPFCVARCP aff 0.0420 aff_rescale 0.0811 cle 0.1708 tap -0.7070 COMB 0.0714
32 ID Sequence pep PFCVARCPS aff 0.0206 aff_rescale 0.0397 cle 0.0274 tap -2.6940 COMB -0.0909
33 ID Sequence pep FCVARCPSG aff 0.0276 aff_rescale 0.0533 cle 0.0263 tap -1.5370 COMB -0.0196
34 ID Sequence pep CVARCPSGV aff 0.0872 aff_rescale 0.1682 cle 0.3335 tap 0.3240 COMB 0.2344
35 ID Sequence pep VARCPSGVK aff 0.0609 aff_rescale 0.1175 cle 0.2690 tap 0.6210 COMB 0.1889
36 ID Sequence pep ARCPSGVKP aff 0.0178 aff_rescale 0.0343 cle 0.0694 tap 0.5110 COMB 0.0702
37 ID Sequence pep RCPSGVKPD aff 0.0198 aff_rescale 0.0381 cle 0.0256 tap -1.4120 COMB -0.0286
38 ID Sequence pep CPSGVKPDL aff 0.3061 aff_rescale 0.5904 cle 0.8562 tap 0.7370 COMB 0.7557 <-E
39 ID Sequence pep PSGVKPDLS aff 0.0077 aff_rescale 0.0148 cle 0.0230 tap -2.8550 COMB -0.1245
40 ID Sequence pep SGVKPDLSY aff 0.0289 aff_rescale 0.0557 cle 0.7732 tap 2.6440 COMB 0.3039
41 ID Sequence pep GVKPDLSYM aff 0.1149 aff_rescale 0.2216 cle 0.8246 tap 0.3160 COMB 0.3611
42 ID Sequence pep VKPDLSYMP aff 0.0141 aff_rescale 0.0271 cle 0.0363 tap 0.1710 COMB 0.0411
43 ID Sequence pep KPDLSYMPI aff 0.6297 aff_rescale 1.2149 cle 0.9457 tap 0.2080 COMB 1.3672 <-E
44 ID Sequence pep PDLSYMPIW aff 0.0144 aff_rescale 0.0278 cle 0.9325 tap 0.2160 COMB 0.1784
45 ID Sequence pep DLSYMPIWK aff 0.0156 aff_rescale 0.0302 cle 0.4285 tap 0.0190 COMB 0.0954
46 ID Sequence pep LSYMPIWKF aff 0.0279 aff_rescale 0.0539 cle 0.8074 tap 2.6270 COMB 0.3063
47 ID Sequence pep SYMPIWKFP aff 0.0160 aff_rescale 0.0309 cle 0.0569 tap 0.5350 COMB 0.0662
48 ID Sequence pep YMPIWKFPD aff 0.0208 aff_rescale 0.0402 cle 0.1287 tap -1.6750 COMB -0.0242
49 ID Sequence pep MPIWKFPDE aff 0.0969 aff_rescale 0.1869 cle 0.5043 tap -1.8060 COMB 0.1722
50 ID Sequence pep PIWKFPDEE aff 0.0184 aff_rescale 0.0354 cle 0.2338 tap -1.7090 COMB -0.0150
51 ID Sequence pep IWKFPDEEG aff 0.0164 aff_rescale 0.0316 cle 0.1752 tap -1.2730 COMB -0.0058
52 ID Sequence pep WKFPDEEGA aff 0.0131 aff_rescale 0.0253 cle 0.1004 tap -0.3920 COMB 0.0207
53 ID Sequence pep KFPDEEGAC aff 0.0288 aff_rescale 0.0555 cle 0.0476 tap 0.2180 COMB 0.0735
54 ID Sequence pep FPDEEGACQ aff 0.0866 aff_rescale 0.1672 cle 0.1122 tap -0.5800 COMB 0.1550
55 ID Sequence pep PDEEGACQP aff 0.0142 aff_rescale 0.0274 cle 0.0360 tap -0.9320 COMB -0.0138
56 ID Sequence pep DEEGACQPC aff 0.0115 aff_rescale 0.0223 cle 0.0268 tap -0.7260 COMB -0.0100
57 ID Sequence pep EEGACQPCP aff 0.0089 aff_rescale 0.0172 cle 0.0246 tap -0.5370 COMB -0.0060
58 ID Sequence pep EGACQPCPI aff 0.0383 aff_rescale 0.0739 cle 0.1443 tap -0.0860 COMB 0.0912
59 ID Sequence pep GACQPCPIN aff 0.0136 aff_rescale 0.0263 cle 0.0336 tap -1.6000 COMB -0.0487
60 ID Sequence pep ACQPCPINC aff 0.0424 aff_rescale 0.0818 cle 0.0235 tap 0.1170 COMB 0.0912
61 ID Sequence pep CQPCPINCT aff 0.0096 aff_rescale 0.0185 cle 0.1787 tap -0.5320 COMB 0.0187
62 ID Sequence pep QPCPINCTH aff 0.1153 aff_rescale 0.2225 cle 0.9102 tap -0.8250 COMB 0.3177
63 ID Sequence pep PCPINCTHS aff 0.0152 aff_rescale 0.0293 cle 0.1806 tap -2.7690 COMB -0.0820
64 ID Sequence pep CPINCTHSC aff 0.4468 aff_rescale 0.8621 cle 0.0637 tap -0.4070 COMB 0.8513 <-E
65 ID Sequence pep PINCTHSCV aff 0.0260 aff_rescale 0.0501 cle 0.9611 tap -0.1380 COMB 0.1874
66 ID Sequence pep INCTHSCVD aff 0.0246 aff_rescale 0.0474 cle 0.0319 tap -2.0810 COMB -0.0519
67 ID Sequence pep NCTHSCVDL aff 0.0363 aff_rescale 0.0700 cle 0.5220 tap 0.9850 COMB 0.1975
68 ID Sequence pep CTHSCVDLD aff 0.0083 aff_rescale 0.0160 cle 0.0237 tap -1.7070 COMB -0.0657
69 ID Sequence pep THSCVDLDD aff 0.0102 aff_rescale 0.0196 cle 0.0626 tap -1.8400 COMB -0.0630
70 ID Sequence pep HSCVDLDDK aff 0.0085 aff_rescale 0.0164 cle 0.1675 tap 0.4330 COMB 0.0632
71 ID Sequence pep SCVDLDDKG aff 0.0133 aff_rescale 0.0257 cle 0.0337 tap -1.2670 COMB -0.0326
72 ID Sequence pep CVDLDDKGC aff 0.0154 aff_rescale 0.0297 cle 0.0279 tap -0.0100 COMB 0.0333
73 ID Sequence pep VDLDDKGCP aff 0.0130 aff_rescale 0.0251 cle 0.0368 tap -0.1300 COMB 0.0241
74 ID Sequence pep DLDDKGCPA aff 0.0227 aff_rescale 0.0437 cle 0.8155 tap -0.9610 COMB 0.1180
75 ID Sequence pep LDDKGCPAE aff 0.0151 aff_rescale 0.0292 cle 0.0997 tap -2.1840 COMB -0.0650
76 ID Sequence pep DDKGCPAEQ aff 0.0121 aff_rescale 0.0233 cle 0.3422 tap -0.6830 COMB 0.0405
77 ID Sequence pep DKGCPAEQR aff 0.0069 aff_rescale 0.0132 cle 0.4259 tap 0.9160 COMB 0.1229
78 ID Sequence pep KGCPAEQRA aff 0.0184 aff_rescale 0.0355 cle 0.2496 tap -0.8250 COMB 0.0317
79 ID Sequence pep GCPAEQRAS aff 0.0169 aff_rescale 0.0326 cle 0.0242 tap -2.3180 COMB -0.0797
80 ID Sequence pep CPAEQRASP aff 0.2686 aff_rescale 0.5182 cle 0.3231 tap -0.2540 COMB 0.5539
81 ID Sequence pep PAEQRASPL aff 0.2432 aff_rescale 0.4691 cle 0.9247 tap 0.3760 COMB 0.6266
82 ID Sequence pep AEQRASPLT aff 0.0173 aff_rescale 0.0334 cle 0.2007 tap -0.8740 COMB 0.0198
83 ID Sequence pep EQRASPLTG aff 0.0253 aff_rescale 0.0488 cle 0.1196 tap -1.3210 COMB 0.0007
84 ID Sequence pep QRASPLTGG aff 0.0127 aff_rescale 0.0245 cle 0.2416 tap -1.3260 COMB -0.0056
85 ID Sequence pep RASPLTGGG aff 0.0943 aff_rescale 0.1820 cle 0.0749 tap -1.1520 COMB 0.1356
86 ID Sequence pep ASPLTGGGS aff 0.0147 aff_rescale 0.0284 cle 0.0276 tap -1.9440 COMB -0.0647
87 ID Sequence pep SPLTGGGSG aff 0.3791 aff_rescale 0.7313 cle 0.4658 tap -1.4750 COMB 0.7275
88 ID Sequence pep PLTGGGSGG aff 0.0172 aff_rescale 0.0331 cle 0.0305 tap -1.8380 COMB -0.0542
89 ID Sequence pep LTGGGSGGG aff 0.0159 aff_rescale 0.0306 cle 0.0267 tap -1.7210 COMB -0.0514
90 ID Sequence pep TGGGSGGGS aff 0.0140 aff_rescale 0.0270 cle 0.0238 tap -2.6480 COMB -0.1019
91 ID Sequence pep GGGSGGGSI aff 0.0627 aff_rescale 0.1209 cle 0.0773 tap -0.0640 COMB 0.1293
92 ID Sequence pep GGSGGGSII aff 0.0565 aff_rescale 0.1089 cle 0.2937 tap 0.0550 COMB 0.1557
93 ID Sequence pep GSGGGSIIS aff 0.0136 aff_rescale 0.0262 cle 0.0470 tap -2.5770 COMB -0.0956
94 ID Sequence pep SGGGSIISA aff 0.0309 aff_rescale 0.0596 cle 0.0816 tap -0.9420 COMB 0.0247
95 ID Sequence pep GGGSIISAV aff 0.0336 aff_rescale 0.0648 cle 0.1279 tap -0.2400 COMB 0.0719
96 ID Sequence pep GGSIISAVV aff 0.0436 aff_rescale 0.0841 cle 0.4797 tap -0.1650 COMB 0.1478
97 ID Sequence pep GSIISAVVG aff 0.0161 aff_rescale 0.0310 cle 0.0237 tap -1.4950 COMB -0.0402
98 ID Sequence pep SIISAVVGI aff 0.0596 aff_rescale 0.1149 cle 0.1874 tap 0.7550 COMB 0.1808
99 ID Sequence pep IISAVVGIL aff 0.1753 aff_rescale 0.3382 cle 0.5148 tap 1.1560 COMB 0.4732
100 ID Sequence pep ISAVVGILL aff 0.0975 aff_rescale 0.1880 cle 0.2648 tap 1.0440 COMB 0.2799
101 ID Sequence pep SAVVGILLV aff 0.0945 aff_rescale 0.1823 cle 0.3325 tap 0.5070 COMB 0.2576
102 ID Sequence pep AVVGILLVV aff 0.1906 aff_rescale 0.3678 cle 0.7946 tap 0.7290 COMB 0.5234
103 ID Sequence pep VVGILLVVV aff 0.0624 aff_rescale 0.1204 cle 0.2172 tap 0.5060 COMB 0.1783
104 ID Sequence pep VGILLVVVL aff 0.0477 aff_rescale 0.0921 cle 0.3706 tap 0.8660 COMB 0.1910
105 ID Sequence pep GILLVVVLG aff 0.0160 aff_rescale 0.0308 cle 0.0384 tap -1.3810 COMB -0.0325
106 ID Sequence pep ILLVVVLGV aff 0.0327 aff_rescale 0.0632 cle 0.5281 tap 0.3450 COMB 0.1596
107 ID Sequence pep LLVVVLGVV aff 0.0533 aff_rescale 0.1029 cle 0.5579 tap 0.4250 COMB 0.2078
108 ID Sequence pep LVVVLGVVF aff 0.1905 aff_rescale 0.3676 cle 0.4182 tap 2.8030 COMB 0.5705
109 ID Sequence pep VVVLGVVFG aff 0.0320 aff_rescale 0.0618 cle 0.0557 tap -1.0690 COMB 0.0167
110 ID Sequence pep VVLGVVFGI aff 0.0610 aff_rescale 0.1176 cle 0.8816 tap 0.8000 COMB 0.2899
111 ID Sequence pep VLGVVFGIL aff 0.0615 aff_rescale 0.1186 cle 0.8738 tap 0.9200 COMB 0.2957
112 ID Sequence pep LGVVFGILI aff 0.0401 aff_rescale 0.0773 cle 0.5499 tap 0.3970 COMB 0.1796

## Sheet: B8
NetCTL-1.2 predictions using MHC supertype B8. Threshold 0.750000
1 ID Sequence pep CHPECQPQN aff 0.0479 aff_rescale 0.1637 cle 0.0496 tap -1.3660 COMB 0.1028
2 ID Sequence pep HPECQPQNG aff 0.0494 aff_rescale 0.1687 cle 0.1474 tap -1.9420 COMB 0.0937
3 ID Sequence pep PECQPQNGS aff 0.0519 aff_rescale 0.1773 cle 0.0345 tap -2.8750 COMB 0.0388
4 ID Sequence pep ECQPQNGSV aff 0.0660 aff_rescale 0.2253 cle 0.3696 tap -0.0460 COMB 0.2785
5 ID Sequence pep CQPQNGSVT aff 0.0547 aff_rescale 0.1868 cle 0.1895 tap -0.8530 COMB 0.1725
6 ID Sequence pep QPQNGSVTC aff 0.0682 aff_rescale 0.2330 cle 0.5316 tap -0.3160 COMB 0.2969
7 ID Sequence pep PQNGSVTCF aff 0.0540 aff_rescale 0.1845 cle 0.8712 tap 1.9870 COMB 0.4146
8 ID Sequence pep QNGSVTCFG aff 0.0481 aff_rescale 0.1643 cle 0.0275 tap -1.8430 COMB 0.0762
9 ID Sequence pep NGSVTCFGP aff 0.0423 aff_rescale 0.1445 cle 0.0372 tap -0.1780 COMB 0.1412
10 ID Sequence pep GSVTCFGPE aff 0.0568 aff_rescale 0.1940 cle 0.0246 tap -1.4850 COMB 0.1234
11 ID Sequence pep SVTCFGPEA aff 0.0476 aff_rescale 0.1624 cle 0.2948 tap -0.4100 COMB 0.1861
12 ID Sequence pep VTCFGPEAD aff 0.0514 aff_rescale 0.1755 cle 0.0278 tap -1.7120 COMB 0.0940
13 ID Sequence pep TCFGPEADQ aff 0.0469 aff_rescale 0.1603 cle 0.0547 tap 0.0530 COMB 0.1711
14 ID Sequence pep CFGPEADQC aff 0.0535 aff_rescale 0.1827 cle 0.0230 tap -0.0120 COMB 0.1855
15 ID Sequence pep FGPEADQCV aff 0.0641 aff_rescale 0.2188 cle 0.8878 tap -0.0690 COMB 0.3485
16 ID Sequence pep GPEADQCVA aff 0.0509 aff_rescale 0.1740 cle 0.9401 tap -1.2680 COMB 0.2516
17 ID Sequence pep PEADQCVAC aff 0.0547 aff_rescale 0.1867 cle 0.0603 tap -0.6140 COMB 0.1651
18 ID Sequence pep EADQCVACA aff 0.0561 aff_rescale 0.1916 cle 0.2650 tap -1.0080 COMB 0.1810
19 ID Sequence pep ADQCVACAH aff 0.0478 aff_rescale 0.1632 cle 0.0688 tap -0.8980 COMB 0.1286
20 ID Sequence pep DQCVACAHY aff 0.0511 aff_rescale 0.1746 cle 0.9200 tap 2.8470 COMB 0.4549
21 ID Sequence pep QCVACAHYK aff 0.0543 aff_rescale 0.1853 cle 0.0686 tap 0.4370 COMB 0.2175
22 ID Sequence pep CVACAHYKD aff 0.0544 aff_rescale 0.1859 cle 0.0240 tap -1.7500 COMB 0.1020
23 ID Sequence pep VACAHYKDP aff 0.0535 aff_rescale 0.1828 cle 0.0227 tap 0.2210 COMB 0.1972
24 ID Sequence pep ACAHYKDPP aff 0.0416 aff_rescale 0.1421 cle 0.0235 tap 0.3330 COMB 0.1623
25 ID Sequence pep CAHYKDPPF aff 0.1000 aff_rescale 0.3416 cle 0.4565 tap 2.7300 COMB 0.5466
26 ID Sequence pep AHYKDPPFC aff 0.0477 aff_rescale 0.1629 cle 0.0316 tap 0.3460 COMB 0.1850
27 ID Sequence pep HYKDPPFCV aff 0.0552 aff_rescale 0.1886 cle 0.9763 tap 0.6400 COMB 0.3670
28 ID Sequence pep YKDPPFCVA aff 0.0693 aff_rescale 0.2366 cle 0.9600 tap -0.7050 COMB 0.3453
29 ID Sequence pep KDPPFCVAR aff 0.0513 aff_rescale 0.1753 cle 0.8817 tap 1.2170 COMB 0.3684
30 ID Sequence pep DPPFCVARC aff 0.0528 aff_rescale 0.1804 cle 0.0606 tap -0.5200 COMB 0.1635
31 ID Sequence pep PPFCVARCP aff 0.0573 aff_rescale 0.1958 cle 0.1708 tap -0.7070 COMB 0.1861
32 ID Sequence pep PFCVARCPS aff 0.0563 aff_rescale 0.1922 cle 0.0274 tap -2.6940 COMB 0.0616
33 ID Sequence pep FCVARCPSG aff 0.0520 aff_rescale 0.1776 cle 0.0263 tap -1.5370 COMB 0.1047
34 ID Sequence pep CVARCPSGV aff 0.0700 aff_rescale 0.2390 cle 0.3335 tap 0.3240 COMB 0.3052
35 ID Sequence pep VARCPSGVK aff 0.0579 aff_rescale 0.1977 cle 0.2690 tap 0.6210 COMB 0.2691
36 ID Sequence pep ARCPSGVKP aff 0.0532 aff_rescale 0.1818 cle 0.0694 tap 0.5110 COMB 0.2178
37 ID Sequence pep RCPSGVKPD aff 0.0478 aff_rescale 0.1633 cle 0.0256 tap -1.4120 COMB 0.0966
38 ID Sequence pep CPSGVKPDL aff 0.0653 aff_rescale 0.2230 cle 0.8562 tap 0.7370 COMB 0.3882
39 ID Sequence pep PSGVKPDLS aff 0.0469 aff_rescale 0.1602 cle 0.0230 tap -2.8550 COMB 0.0209
40 ID Sequence pep SGVKPDLSY aff 0.0532 aff_rescale 0.1816 cle 0.7732 tap 2.6440 COMB 0.4298
41 ID Sequence pep GVKPDLSYM aff 0.0716 aff_rescale 0.2444 cle 0.8246 tap 0.3160 COMB 0.3839
42 ID Sequence pep VKPDLSYMP aff 0.0520 aff_rescale 0.1776 cle 0.0363 tap 0.1710 COMB 0.1916
43 ID Sequence pep KPDLSYMPI aff 0.0853 aff_rescale 0.2913 cle 0.9457 tap 0.2080 COMB 0.4435
44 ID Sequence pep PDLSYMPIW aff 0.0547 aff_rescale 0.1869 cle 0.9325 tap 0.2160 COMB 0.3375
45 ID Sequence pep DLSYMPIWK aff 0.0457 aff_rescale 0.1560 cle 0.4285 tap 0.0190 COMB 0.2213
46 ID Sequence pep LSYMPIWKF aff 0.0638 aff_rescale 0.2179 cle 0.8074 tap 2.6270 COMB 0.4704
47 ID Sequence pep SYMPIWKFP aff 0.0539 aff_rescale 0.1840 cle 0.0569 tap 0.5350 COMB 0.2192
48 ID Sequence pep YMPIWKFPD aff 0.0525 aff_rescale 0.1794 cle 0.1287 tap -1.6750 COMB 0.1150
49 ID Sequence pep MPIWKFPDE aff 0.0693 aff_rescale 0.2368 cle 0.5043 tap -1.8060 COMB 0.2222
50 ID Sequence pep PIWKFPDEE aff 0.0507 aff_rescale 0.1732 cle 0.2338 tap -1.7090 COMB 0.1228
51 ID Sequence pep IWKFPDEEG aff 0.0426 aff_rescale 0.1454 cle 0.1752 tap -1.2730 COMB 0.1080
52 ID Sequence pep WKFPDEEGA aff 0.0582 aff_rescale 0.1988 cle 0.1004 tap -0.3920 COMB 0.1943
53 ID Sequence pep KFPDEEGAC aff 0.0532 aff_rescale 0.1815 cle 0.0476 tap 0.2180 COMB 0.1996
54 ID Sequence pep FPDEEGACQ aff 0.0558 aff_rescale 0.1907 cle 0.1122 tap -0.5800 COMB 0.1785
55 ID Sequence pep PDEEGACQP aff 0.0410 aff_rescale 0.1401 cle 0.0360 tap -0.9320 COMB 0.0989
56 ID Sequence pep DEEGACQPC aff 0.0498 aff_rescale 0.1702 cle 0.0268 tap -0.7260 COMB 0.1379
57 ID Sequence pep EEGACQPCP aff 0.0487 aff_rescale 0.1662 cle 0.0246 tap -0.5370 COMB 0.1430
58 ID Sequence pep EGACQPCPI aff 0.0624 aff_rescale 0.2132 cle 0.1443 tap -0.0860 COMB 0.2306
59 ID Sequence pep GACQPCPIN aff 0.0461 aff_rescale 0.1575 cle 0.0336 tap -1.6000 COMB 0.0826
60 ID Sequence pep ACQPCPINC aff 0.0427 aff_rescale 0.1459 cle 0.0235 tap 0.1170 COMB 0.1553
61 ID Sequence pep CQPCPINCT aff 0.0527 aff_rescale 0.1800 cle 0.1787 tap -0.5320 COMB 0.1802
62 ID Sequence pep QPCPINCTH aff 0.0667 aff_rescale 0.2279 cle 0.9102 tap -0.8250 COMB 0.3231
63 ID Sequence pep PCPINCTHS aff 0.0413 aff_rescale 0.1412 cle 0.1806 tap -2.7690 COMB 0.0298
64 ID Sequence pep CPINCTHSC aff 0.0675 aff_rescale 0.2304 cle 0.0637 tap -0.4070 COMB 0.2196
65 ID Sequence pep PINCTHSCV aff 0.0552 aff_rescale 0.1884 cle 0.9611 tap -0.1380 COMB 0.3257
66 ID Sequence pep INCTHSCVD aff 0.0465 aff_rescale 0.1587 cle 0.0319 tap -2.0810 COMB 0.0595
67 ID Sequence pep NCTHSCVDL aff 0.0495 aff_rescale 0.1692 cle 0.5220 tap 0.9850 COMB 0.2967
68 ID Sequence pep CTHSCVDLD aff 0.0466 aff_rescale 0.1593 cle 0.0237 tap -1.7070 COMB 0.0775
69 ID Sequence pep THSCVDLDD aff 0.0419 aff_rescale 0.1430 cle 0.0626 tap -1.8400 COMB 0.0604
70 ID Sequence pep HSCVDLDDK aff 0.0522 aff_rescale 0.1783 cle 0.1675 tap 0.4330 COMB 0.2251
71 ID Sequence pep SCVDLDDKG aff 0.0475 aff_rescale 0.1622 cle 0.0337 tap -1.2670 COMB 0.1040
72 ID Sequence pep CVDLDDKGC aff 0.0517 aff_rescale 0.1766 cle 0.0279 tap -0.0100 COMB 0.1803
73 ID Sequence pep VDLDDKGCP aff 0.0487 aff_rescale 0.1664 cle 0.0368 tap -0.1300 COMB 0.1654
74 ID Sequence pep DLDDKGCPA aff 0.0546 aff_rescale 0.1865 cle 0.8155 tap -0.9610 COMB 0.2608
75 ID Sequence pep LDDKGCPAE aff 0.0497 aff_rescale 0.1696 cle 0.0997 tap -2.1840 COMB 0.0753
76 ID Sequence pep DDKGCPAEQ aff 0.0448 aff_rescale 0.1531 cle 0.3422 tap -0.6830 COMB 0.1703
77 ID Sequence pep DKGCPAEQR aff 0.0523 aff_rescale 0.1786 cle 0.4259 tap 0.9160 COMB 0.2882
78 ID Sequence pep KGCPAEQRA aff 0.0592 aff_rescale 0.2021 cle 0.2496 tap -0.8250 COMB 0.1983
79 ID Sequence pep GCPAEQRAS aff 0.0478 aff_rescale 0.1634 cle 0.0242 tap -2.3180 COMB 0.0511
80 ID Sequence pep CPAEQRASP aff 0.0653 aff_rescale 0.2230 cle 0.3231 tap -0.2540 COMB 0.2588
81 ID Sequence pep PAEQRASPL aff 0.1312 aff_rescale 0.4481 cle 0.9247 tap 0.3760 COMB 0.6056
82 ID Sequence pep AEQRASPLT aff 0.0487 aff_rescale 0.1662 cle 0.2007 tap -0.8740 COMB 0.1526
83 ID Sequence pep EQRASPLTG aff 0.0452 aff_rescale 0.1543 cle 0.1196 tap -1.3210 COMB 0.1061
84 ID Sequence pep QRASPLTGG aff 0.0529 aff_rescale 0.1806 cle 0.2416 tap -1.3260 COMB 0.1506
85 ID Sequence pep RASPLTGGG aff 0.0539 aff_rescale 0.1842 cle 0.0749 tap -1.1520 COMB 0.1378
86 ID Sequence pep ASPLTGGGS aff 0.0447 aff_rescale 0.1527 cle 0.0276 tap -1.9440 COMB 0.0596
87 ID Sequence pep SPLTGGGSG aff 0.0547 aff_rescale 0.1869 cle 0.4658 tap -1.4750 COMB 0.1830
88 ID Sequence pep PLTGGGSGG aff 0.0465 aff_rescale 0.1590 cle 0.0305 tap -1.8380 COMB 0.0716
89 ID Sequence pep LTGGGSGGG aff 0.0514 aff_rescale 0.1757 cle 0.0267 tap -1.7210 COMB 0.0936
90 ID Sequence pep TGGGSGGGS aff 0.0501 aff_rescale 0.1709 cle 0.0238 tap -2.6480 COMB 0.0421
91 ID Sequence pep GGGSGGGSI aff 0.0575 aff_rescale 0.1962 cle 0.0773 tap -0.0640 COMB 0.2046
92 ID Sequence pep GGSGGGSII aff 0.0555 aff_rescale 0.1896 cle 0.2937 tap 0.0550 COMB 0.2364
93 ID Sequence pep GSGGGSIIS aff 0.0505 aff_rescale 0.1725 cle 0.0470 tap -2.5770 COMB 0.0507
94 ID Sequence pep SGGGSIISA aff 0.0538 aff_rescale 0.1838 cle 0.0816 tap -0.9420 COMB 0.1490
95 ID Sequence pep GGGSIISAV aff 0.0655 aff_rescale 0.2238 cle 0.1279 tap -0.2400 COMB 0.2310
96 ID Sequence pep GGSIISAVV aff 0.0695 aff_rescale 0.2374 cle 0.4797 tap -0.1650 COMB 0.3011
97 ID Sequence pep GSIISAVVG aff 0.0439 aff_rescale 0.1499 cle 0.0237 tap -1.4950 COMB 0.0787
98 ID Sequence pep SIISAVVGI aff 0.0616 aff_rescale 0.2105 cle 0.1874 tap 0.7550 COMB 0.2764
99 ID Sequence pep IISAVVGIL aff 0.1023 aff_rescale 0.3493 cle 0.5148 tap 1.1560 COMB 0.4843
100 ID Sequence pep ISAVVGILL aff 0.0863 aff_rescale 0.2947 cle 0.2648 tap 1.0440 COMB 0.3866
101 ID Sequence pep SAVVGILLV aff 0.0603 aff_rescale 0.2060 cle 0.3325 tap 0.5070 COMB 0.2812
102 ID Sequence pep AVVGILLVV aff 0.0624 aff_rescale 0.2133 cle 0.7946 tap 0.7290 COMB 0.3689
103 ID Sequence pep VVGILLVVV aff 0.0752 aff_rescale 0.2569 cle 0.2172 tap 0.5060 COMB 0.3147
104 ID Sequence pep VGILLVVVL aff 0.2335 aff_rescale 0.7974 cle 0.3706 tap 0.8660 COMB 0.8963 <-E
105 ID Sequence pep GILLVVVLG aff 0.0506 aff_rescale 0.1728 cle 0.0384 tap -1.3810 COMB 0.1095
106 ID Sequence pep ILLVVVLGV aff 0.0935 aff_rescale 0.3193 cle 0.5281 tap 0.3450 COMB 0.4158
107 ID Sequence pep LLVVVLGVV aff 0.1112 aff_rescale 0.3799 cle 0.5579 tap 0.4250 COMB 0.4848
108 ID Sequence pep LVVVLGVVF aff 0.1847 aff_rescale 0.6308 cle 0.4182 tap 2.8030 COMB 0.8336 <-E
109 ID Sequence pep VVVLGVVFG aff 0.0489 aff_rescale 0.1669 cle 0.0557 tap -1.0690 COMB 0.1218
110 ID Sequence pep VVLGVVFGI aff 0.0641 aff_rescale 0.2190 cle 0.8816 tap 0.8000 COMB 0.3913
111 ID Sequence pep VLGVVFGIL aff 0.1169 aff_rescale 0.3992 cle 0.8738 tap 0.9200 COMB 0.5762
112 ID Sequence pep LGVVFGILI aff 0.0758 aff_rescale 0.2590 cle 0.5499 tap 0.3970 COMB 0.3613

## Sheet: B27
NetCTL-1.2 predictions using MHC supertype B27. Threshold 0.750000
1 ID Sequence pep CHPECQPQN aff 0.0288 aff_rescale 0.0767 cle 0.0496 tap -1.3660 COMB 0.0158
2 ID Sequence pep HPECQPQNG aff 0.0224 aff_rescale 0.0595 cle 0.1474 tap -1.9420 COMB -0.0155
3 ID Sequence pep PECQPQNGS aff 0.0232 aff_rescale 0.0616 cle 0.0345 tap -2.8750 COMB -0.0770
4 ID Sequence pep ECQPQNGSV aff 0.0226 aff_rescale 0.0602 cle 0.3696 tap -0.0460 COMB 0.1133
5 ID Sequence pep CQPQNGSVT aff 0.0358 aff_rescale 0.0951 cle 0.1895 tap -0.8530 COMB 0.0809
6 ID Sequence pep QPQNGSVTC aff 0.0290 aff_rescale 0.0771 cle 0.5316 tap -0.3160 COMB 0.1410
7 ID Sequence pep PQNGSVTCF aff 0.1230 aff_rescale 0.3270 cle 0.8712 tap 1.9870 COMB 0.5570
8 ID Sequence pep QNGSVTCFG aff 0.0226 aff_rescale 0.0601 cle 0.0275 tap -1.8430 COMB -0.0279
9 ID Sequence pep NGSVTCFGP aff 0.0231 aff_rescale 0.0613 cle 0.0372 tap -0.1780 COMB 0.0580
10 ID Sequence pep GSVTCFGPE aff 0.0331 aff_rescale 0.0879 cle 0.0246 tap -1.4850 COMB 0.0173
11 ID Sequence pep SVTCFGPEA aff 0.0287 aff_rescale 0.0763 cle 0.2948 tap -0.4100 COMB 0.1001
12 ID Sequence pep VTCFGPEAD aff 0.0221 aff_rescale 0.0587 cle 0.0278 tap -1.7120 COMB -0.0228
13 ID Sequence pep TCFGPEADQ aff 0.0263 aff_rescale 0.0700 cle 0.0547 tap 0.0530 COMB 0.0809
14 ID Sequence pep CFGPEADQC aff 0.0213 aff_rescale 0.0567 cle 0.0230 tap -0.0120 COMB 0.0596
15 ID Sequence pep FGPEADQCV aff 0.0249 aff_rescale 0.0662 cle 0.8878 tap -0.0690 COMB 0.1959
16 ID Sequence pep GPEADQCVA aff 0.0236 aff_rescale 0.0626 cle 0.9401 tap -1.2680 COMB 0.1402
17 ID Sequence pep PEADQCVAC aff 0.0243 aff_rescale 0.0647 cle 0.0603 tap -0.6140 COMB 0.0430
18 ID Sequence pep EADQCVACA aff 0.0249 aff_rescale 0.0662 cle 0.2650 tap -1.0080 COMB 0.0556
19 ID Sequence pep ADQCVACAH aff 0.0250 aff_rescale 0.0665 cle 0.0688 tap -0.8980 COMB 0.0319
20 ID Sequence pep DQCVACAHY aff 0.0538 aff_rescale 0.1431 cle 0.9200 tap 2.8470 COMB 0.4234
21 ID Sequence pep QCVACAHYK aff 0.0307 aff_rescale 0.0816 cle 0.0686 tap 0.4370 COMB 0.1137
22 ID Sequence pep CVACAHYKD aff 0.0257 aff_rescale 0.0683 cle 0.0240 tap -1.7500 COMB -0.0156
23 ID Sequence pep VACAHYKDP aff 0.0256 aff_rescale 0.0679 cle 0.0227 tap 0.2210 COMB 0.0824
24 ID Sequence pep ACAHYKDPP aff 0.0238 aff_rescale 0.0632 cle 0.0235 tap 0.3330 COMB 0.0834
25 ID Sequence pep CAHYKDPPF aff 0.0311 aff_rescale 0.0827 cle 0.4565 tap 2.7300 COMB 0.2877
26 ID Sequence pep AHYKDPPFC aff 0.0293 aff_rescale 0.0778 cle 0.0316 tap 0.3460 COMB 0.0998
27 ID Sequence pep HYKDPPFCV aff 0.0317 aff_rescale 0.0841 cle 0.9763 tap 0.6400 COMB 0.2626
28 ID Sequence pep YKDPPFCVA aff 0.0329 aff_rescale 0.0874 cle 0.9600 tap -0.7050 COMB 0.1961
29 ID Sequence pep KDPPFCVAR aff 0.0313 aff_rescale 0.0833 cle 0.8817 tap 1.2170 COMB 0.2764
30 ID Sequence pep DPPFCVARC aff 0.0225 aff_rescale 0.0598 cle 0.0606 tap -0.5200 COMB 0.0429
31 ID Sequence pep PPFCVARCP aff 0.0248 aff_rescale 0.0658 cle 0.1708 tap -0.7070 COMB 0.0561
32 ID Sequence pep PFCVARCPS aff 0.0222 aff_rescale 0.0590 cle 0.0274 tap -2.6940 COMB -0.0716
33 ID Sequence pep FCVARCPSG aff 0.0227 aff_rescale 0.0603 cle 0.0263 tap -1.5370 COMB -0.0126
34 ID Sequence pep CVARCPSGV aff 0.0275 aff_rescale 0.0731 cle 0.3335 tap 0.3240 COMB 0.1394
35 ID Sequence pep VARCPSGVK aff 0.0298 aff_rescale 0.0793 cle 0.2690 tap 0.6210 COMB 0.1507
36 ID Sequence pep ARCPSGVKP aff 0.1175 aff_rescale 0.3123 cle 0.0694 tap 0.5110 COMB 0.3483
37 ID Sequence pep RCPSGVKPD aff 0.0258 aff_rescale 0.0685 cle 0.0256 tap -1.4120 COMB 0.0017
38 ID Sequence pep CPSGVKPDL aff 0.0284 aff_rescale 0.0754 cle 0.8562 tap 0.7370 COMB 0.2406
39 ID Sequence pep PSGVKPDLS aff 0.0219 aff_rescale 0.0582 cle 0.0230 tap -2.8550 COMB -0.0811
40 ID Sequence pep SGVKPDLSY aff 0.0327 aff_rescale 0.0869 cle 0.7732 tap 2.6440 COMB 0.3350
41 ID Sequence pep GVKPDLSYM aff 0.0326 aff_rescale 0.0868 cle 0.8246 tap 0.3160 COMB 0.2263
42 ID Sequence pep VKPDLSYMP aff 0.0466 aff_rescale 0.1239 cle 0.0363 tap 0.1710 COMB 0.1379
43 ID Sequence pep KPDLSYMPI aff 0.0351 aff_rescale 0.0932 cle 0.9457 tap 0.2080 COMB 0.2454
44 ID Sequence pep PDLSYMPIW aff 0.0240 aff_rescale 0.0639 cle 0.9325 tap 0.2160 COMB 0.2146
45 ID Sequence pep DLSYMPIWK aff 0.0303 aff_rescale 0.0805 cle 0.4285 tap 0.0190 COMB 0.1457
46 ID Sequence pep LSYMPIWKF aff 0.0481 aff_rescale 0.1278 cle 0.8074 tap 2.6270 COMB 0.3802
47 ID Sequence pep SYMPIWKFP aff 0.0294 aff_rescale 0.0783 cle 0.0569 tap 0.5350 COMB 0.1135
48 ID Sequence pep YMPIWKFPD aff 0.0465 aff_rescale 0.1235 cle 0.1287 tap -1.6750 COMB 0.0591
49 ID Sequence pep MPIWKFPDE aff 0.0245 aff_rescale 0.0651 cle 0.5043 tap -1.8060 COMB 0.0504
50 ID Sequence pep PIWKFPDEE aff 0.0247 aff_rescale 0.0656 cle 0.2338 tap -1.7090 COMB 0.0152
51 ID Sequence pep IWKFPDEEG aff 0.0211 aff_rescale 0.0562 cle 0.1752 tap -1.2730 COMB 0.0188
52 ID Sequence pep WKFPDEEGA aff 0.0482 aff_rescale 0.1281 cle 0.1004 tap -0.3920 COMB 0.1236
53 ID Sequence pep KFPDEEGAC aff 0.0237 aff_rescale 0.0629 cle 0.0476 tap 0.2180 COMB 0.0809
54 ID Sequence pep FPDEEGACQ aff 0.0249 aff_rescale 0.0662 cle 0.1122 tap -0.5800 COMB 0.0540
55 ID Sequence pep PDEEGACQP aff 0.0223 aff_rescale 0.0593 cle 0.0360 tap -0.9320 COMB 0.0181
56 ID Sequence pep DEEGACQPC aff 0.0248 aff_rescale 0.0659 cle 0.0268 tap -0.7260 COMB 0.0337
57 ID Sequence pep EEGACQPCP aff 0.0274 aff_rescale 0.0727 cle 0.0246 tap -0.5370 COMB 0.0496
58 ID Sequence pep EGACQPCPI aff 0.0234 aff_rescale 0.0621 cle 0.1443 tap -0.0860 COMB 0.0794
59 ID Sequence pep GACQPCPIN aff 0.0235 aff_rescale 0.0625 cle 0.0336 tap -1.6000 COMB -0.0125
60 ID Sequence pep ACQPCPINC aff 0.0224 aff_rescale 0.0596 cle 0.0235 tap 0.1170 COMB 0.0690
61 ID Sequence pep CQPCPINCT aff 0.0279 aff_rescale 0.0740 cle 0.1787 tap -0.5320 COMB 0.0742
62 ID Sequence pep QPCPINCTH aff 0.0249 aff_rescale 0.0661 cle 0.9102 tap -0.8250 COMB 0.1614
63 ID Sequence pep PCPINCTHS aff 0.0211 aff_rescale 0.0562 cle 0.1806 tap -2.7690 COMB -0.0551
64 ID Sequence pep CPINCTHSC aff 0.0240 aff_rescale 0.0639 cle 0.0637 tap -0.4070 COMB 0.0531
65 ID Sequence pep PINCTHSCV aff 0.0240 aff_rescale 0.0638 cle 0.9611 tap -0.1380 COMB 0.2010
66 ID Sequence pep INCTHSCVD aff 0.0231 aff_rescale 0.0614 cle 0.0319 tap -2.0810 COMB -0.0379
67 ID Sequence pep NCTHSCVDL aff 0.0235 aff_rescale 0.0626 cle 0.5220 tap 0.9850 COMB 0.1901
68 ID Sequence pep CTHSCVDLD aff 0.0222 aff_rescale 0.0589 cle 0.0237 tap -1.7070 COMB -0.0229
69 ID Sequence pep THSCVDLDD aff 0.0264 aff_rescale 0.0701 cle 0.0626 tap -1.8400 COMB -0.0126
70 ID Sequence pep HSCVDLDDK aff 0.0291 aff_rescale 0.0774 cle 0.1675 tap 0.4330 COMB 0.1242
71 ID Sequence pep SCVDLDDKG aff 0.0218 aff_rescale 0.0581 cle 0.0337 tap -1.2670 COMB -0.0002
72 ID Sequence pep CVDLDDKGC aff 0.0220 aff_rescale 0.0585 cle 0.0279 tap -0.0100 COMB 0.0622
73 ID Sequence pep VDLDDKGCP aff 0.0243 aff_rescale 0.0645 cle 0.0368 tap -0.1300 COMB 0.0635
74 ID Sequence pep DLDDKGCPA aff 0.0229 aff_rescale 0.0609 cle 0.8155 tap -0.9610 COMB 0.1351
75 ID Sequence pep LDDKGCPAE aff 0.0224 aff_rescale 0.0595 cle 0.0997 tap -2.1840 COMB -0.0348
76 ID Sequence pep DDKGCPAEQ aff 0.0253 aff_rescale 0.0671 cle 0.3422 tap -0.6830 COMB 0.0843
77 ID Sequence pep DKGCPAEQR aff 0.0328 aff_rescale 0.0873 cle 0.4259 tap 0.9160 COMB 0.1969
78 ID Sequence pep KGCPAEQRA aff 0.0256 aff_rescale 0.0680 cle 0.2496 tap -0.8250 COMB 0.0642
79 ID Sequence pep GCPAEQRAS aff 0.0241 aff_rescale 0.0642 cle 0.0242 tap -2.3180 COMB -0.0481
80 ID Sequence pep CPAEQRASP aff 0.0281 aff_rescale 0.0748 cle 0.3231 tap -0.2540 COMB 0.1105
81 ID Sequence pep PAEQRASPL aff 0.0282 aff_rescale 0.0749 cle 0.9247 tap 0.3760 COMB 0.2324
82 ID Sequence pep AEQRASPLT aff 0.0315 aff_rescale 0.0837 cle 0.2007 tap -0.8740 COMB 0.0701
83 ID Sequence pep EQRASPLTG aff 0.0411 aff_rescale 0.1092 cle 0.1196 tap -1.3210 COMB 0.0611
84 ID Sequence pep QRASPLTGG aff 0.0996 aff_rescale 0.2649 cle 0.2416 tap -1.3260 COMB 0.2348
85 ID Sequence pep RASPLTGGG aff 0.0288 aff_rescale 0.0764 cle 0.0749 tap -1.1520 COMB 0.0301
86 ID Sequence pep ASPLTGGGS aff 0.0251 aff_rescale 0.0666 cle 0.0276 tap -1.9440 COMB -0.0264
87 ID Sequence pep SPLTGGGSG aff 0.0243 aff_rescale 0.0645 cle 0.4658 tap -1.4750 COMB 0.0606
88 ID Sequence pep PLTGGGSGG aff 0.0236 aff_rescale 0.0626 cle 0.0305 tap -1.8380 COMB -0.0247
89 ID Sequence pep LTGGGSGGG aff 0.0237 aff_rescale 0.0631 cle 0.0267 tap -1.7210 COMB -0.0189
90 ID Sequence pep TGGGSGGGS aff 0.0242 aff_rescale 0.0642 cle 0.0238 tap -2.6480 COMB -0.0646
91 ID Sequence pep GGGSGGGSI aff 0.0265 aff_rescale 0.0704 cle 0.0773 tap -0.0640 COMB 0.0788
92 ID Sequence pep GGSGGGSII aff 0.0303 aff_rescale 0.0806 cle 0.2937 tap 0.0550 COMB 0.1274
93 ID Sequence pep GSGGGSIIS aff 0.0320 aff_rescale 0.0852 cle 0.0470 tap -2.5770 COMB -0.0366
94 ID Sequence pep SGGGSIISA aff 0.0303 aff_rescale 0.0806 cle 0.0816 tap -0.9420 COMB 0.0457
95 ID Sequence pep GGGSIISAV aff 0.0314 aff_rescale 0.0835 cle 0.1279 tap -0.2400 COMB 0.0907
96 ID Sequence pep GGSIISAVV aff 0.0317 aff_rescale 0.0843 cle 0.4797 tap -0.1650 COMB 0.1480
97 ID Sequence pep GSIISAVVG aff 0.0290 aff_rescale 0.0772 cle 0.0237 tap -1.4950 COMB 0.0060
98 ID Sequence pep SIISAVVGI aff 0.0470 aff_rescale 0.1250 cle 0.1874 tap 0.7550 COMB 0.1908
99 ID Sequence pep IISAVVGIL aff 0.0298 aff_rescale 0.0792 cle 0.5148 tap 1.1560 COMB 0.2142
100 ID Sequence pep ISAVVGILL aff 0.0333 aff_rescale 0.0886 cle 0.2648 tap 1.0440 COMB 0.1805
101 ID Sequence pep SAVVGILLV aff 0.0342 aff_rescale 0.0910 cle 0.3325 tap 0.5070 COMB 0.1662
102 ID Sequence pep AVVGILLVV aff 0.0447 aff_rescale 0.1187 cle 0.7946 tap 0.7290 COMB 0.2743
103 ID Sequence pep VVGILLVVV aff 0.0261 aff_rescale 0.0693 cle 0.2172 tap 0.5060 COMB 0.1272
104 ID Sequence pep VGILLVVVL aff 0.0352 aff_rescale 0.0935 cle 0.3706 tap 0.8660 COMB 0.1924
105 ID Sequence pep GILLVVVLG aff 0.0326 aff_rescale 0.0868 cle 0.0384 tap -1.3810 COMB 0.0235
106 ID Sequence pep ILLVVVLGV aff 0.0435 aff_rescale 0.1157 cle 0.5281 tap 0.3450 COMB 0.2121
107 ID Sequence pep LLVVVLGVV aff 0.0284 aff_rescale 0.0756 cle 0.5579 tap 0.4250 COMB 0.1805
108 ID Sequence pep LVVVLGVVF aff 0.0414 aff_rescale 0.1100 cle 0.4182 tap 2.8030 COMB 0.3129
109 ID Sequence pep VVVLGVVFG aff 0.0235 aff_rescale 0.0624 cle 0.0557 tap -1.0690 COMB 0.0173
110 ID Sequence pep VVLGVVFGI aff 0.0554 aff_rescale 0.1473 cle 0.8816 tap 0.8000 COMB 0.3195
111 ID Sequence pep VLGVVFGIL aff 0.0268 aff_rescale 0.0712 cle 0.8738 tap 0.9200 COMB 0.2483
112 ID Sequence pep LGVVFGILI aff 0.0254 aff_rescale 0.0676 cle 0.5499 tap 0.3970 COMB 0.1699

## Sheet: B39
NetCTL-1.2 predictions using MHC supertype B39. Threshold 0.750000
1 ID Sequence pep CHPECQPQN aff 0.0256 aff_rescale 0.0819 cle 0.0496 tap -1.3660 COMB 0.0211
2 ID Sequence pep HPECQPQNG aff 0.0187 aff_rescale 0.0598 cle 0.1474 tap -1.9420 COMB -0.0151
3 ID Sequence pep PECQPQNGS aff 0.0161 aff_rescale 0.0515 cle 0.0345 tap -2.8750 COMB -0.0871
4 ID Sequence pep ECQPQNGSV aff 0.0243 aff_rescale 0.0779 cle 0.3696 tap -0.0460 COMB 0.1310
5 ID Sequence pep CQPQNGSVT aff 0.0269 aff_rescale 0.0863 cle 0.1895 tap -0.8530 COMB 0.0720
6 ID Sequence pep QPQNGSVTC aff 0.0254 aff_rescale 0.0812 cle 0.5316 tap -0.3160 COMB 0.1451
7 ID Sequence pep PQNGSVTCF aff 0.0514 aff_rescale 0.1647 cle 0.8712 tap 1.9870 COMB 0.3947
8 ID Sequence pep QNGSVTCFG aff 0.0173 aff_rescale 0.0553 cle 0.0275 tap -1.8430 COMB -0.0327
9 ID Sequence pep NGSVTCFGP aff 0.0181 aff_rescale 0.0579 cle 0.0372 tap -0.1780 COMB 0.0546
10 ID Sequence pep GSVTCFGPE aff 0.0164 aff_rescale 0.0524 cle 0.0246 tap -1.4850 COMB -0.0182
11 ID Sequence pep SVTCFGPEA aff 0.0191 aff_rescale 0.0612 cle 0.2948 tap -0.4100 COMB 0.0849
12 ID Sequence pep VTCFGPEAD aff 0.0161 aff_rescale 0.0515 cle 0.0278 tap -1.7120 COMB -0.0299
13 ID Sequence pep TCFGPEADQ aff 0.0171 aff_rescale 0.0549 cle 0.0547 tap 0.0530 COMB 0.0657
14 ID Sequence pep CFGPEADQC aff 0.0183 aff_rescale 0.0586 cle 0.0230 tap -0.0120 COMB 0.0614
15 ID Sequence pep FGPEADQCV aff 0.0324 aff_rescale 0.1037 cle 0.8878 tap -0.0690 COMB 0.2334
16 ID Sequence pep GPEADQCVA aff 0.0261 aff_rescale 0.0835 cle 0.9401 tap -1.2680 COMB 0.1611
17 ID Sequence pep PEADQCVAC aff 0.0253 aff_rescale 0.0810 cle 0.0603 tap -0.6140 COMB 0.0594
18 ID Sequence pep EADQCVACA aff 0.0275 aff_rescale 0.0880 cle 0.2650 tap -1.0080 COMB 0.0774
19 ID Sequence pep ADQCVACAH aff 0.0174 aff_rescale 0.0556 cle 0.0688 tap -0.8980 COMB 0.0210
20 ID Sequence pep DQCVACAHY aff 0.0186 aff_rescale 0.0594 cle 0.9200 tap 2.8470 COMB 0.3398
21 ID Sequence pep QCVACAHYK aff 0.0159 aff_rescale 0.0510 cle 0.0686 tap 0.4370 COMB 0.0831
22 ID Sequence pep CVACAHYKD aff 0.0164 aff_rescale 0.0526 cle 0.0240 tap -1.7500 COMB -0.0313
23 ID Sequence pep VACAHYKDP aff 0.0157 aff_rescale 0.0502 cle 0.0227 tap 0.2210 COMB 0.0647
24 ID Sequence pep ACAHYKDPP aff 0.0175 aff_rescale 0.0562 cle 0.0235 tap 0.3330 COMB 0.0763
25 ID Sequence pep CAHYKDPPF aff 0.0275 aff_rescale 0.0881 cle 0.4565 tap 2.7300 COMB 0.2931
26 ID Sequence pep AHYKDPPFC aff 0.0609 aff_rescale 0.1948 cle 0.0316 tap 0.3460 COMB 0.2169
27 ID Sequence pep HYKDPPFCV aff 0.0859 aff_rescale 0.2750 cle 0.9763 tap 0.6400 COMB 0.4534
28 ID Sequence pep YKDPPFCVA aff 0.1871 aff_rescale 0.5989 cle 0.9600 tap -0.7050 COMB 0.7077
29 ID Sequence pep KDPPFCVAR aff 0.0170 aff_rescale 0.0543 cle 0.8817 tap 1.2170 COMB 0.2475
30 ID Sequence pep DPPFCVARC aff 0.0163 aff_rescale 0.0522 cle 0.0606 tap -0.5200 COMB 0.0352
31 ID Sequence pep PPFCVARCP aff 0.0154 aff_rescale 0.0493 cle 0.1708 tap -0.7070 COMB 0.0396
32 ID Sequence pep PFCVARCPS aff 0.0167 aff_rescale 0.0533 cle 0.0274 tap -2.6940 COMB -0.0772
33 ID Sequence pep FCVARCPSG aff 0.0167 aff_rescale 0.0534 cle 0.0263 tap -1.5370 COMB -0.0195
34 ID Sequence pep CVARCPSGV aff 0.0229 aff_rescale 0.0732 cle 0.3335 tap 0.3240 COMB 0.1395
35 ID Sequence pep VARCPSGVK aff 0.0166 aff_rescale 0.0532 cle 0.2690 tap 0.6210 COMB 0.1246
36 ID Sequence pep ARCPSGVKP aff 0.0213 aff_rescale 0.0683 cle 0.0694 tap 0.5110 COMB 0.1043
37 ID Sequence pep RCPSGVKPD aff 0.0152 aff_rescale 0.0485 cle 0.0256 tap -1.4120 COMB -0.0182
38 ID Sequence pep CPSGVKPDL aff 0.0653 aff_rescale 0.2090 cle 0.8562 tap 0.7370 COMB 0.3742
39 ID Sequence pep PSGVKPDLS aff 0.0162 aff_rescale 0.0519 cle 0.0230 tap -2.8550 COMB -0.0874
40 ID Sequence pep SGVKPDLSY aff 0.0244 aff_rescale 0.0781 cle 0.7732 tap 2.6440 COMB 0.3263
41 ID Sequence pep GVKPDLSYM aff 0.0280 aff_rescale 0.0896 cle 0.8246 tap 0.3160 COMB 0.2291
42 ID Sequence pep VKPDLSYMP aff 0.0202 aff_rescale 0.0646 cle 0.0363 tap 0.1710 COMB 0.0786
43 ID Sequence pep KPDLSYMPI aff 0.0804 aff_rescale 0.2573 cle 0.9457 tap 0.2080 COMB 0.4095
44 ID Sequence pep PDLSYMPIW aff 0.0233 aff_rescale 0.0746 cle 0.9325 tap 0.2160 COMB 0.2253
45 ID Sequence pep DLSYMPIWK aff 0.0163 aff_rescale 0.0522 cle 0.4285 tap 0.0190 COMB 0.1174
46 ID Sequence pep LSYMPIWKF aff 0.0407 aff_rescale 0.1302 cle 0.8074 tap 2.6270 COMB 0.3827
47 ID Sequence pep SYMPIWKFP aff 0.0202 aff_rescale 0.0646 cle 0.0569 tap 0.5350 COMB 0.0999
48 ID Sequence pep YMPIWKFPD aff 0.0351 aff_rescale 0.1125 cle 0.1287 tap -1.6750 COMB 0.0480
49 ID Sequence pep MPIWKFPDE aff 0.0159 aff_rescale 0.0510 cle 0.5043 tap -1.8060 COMB 0.0363
50 ID Sequence pep PIWKFPDEE aff 0.0151 aff_rescale 0.0483 cle 0.2338 tap -1.7090 COMB -0.0021
51 ID Sequence pep IWKFPDEEG aff 0.0164 aff_rescale 0.0526 cle 0.1752 tap -1.2730 COMB 0.0152
52 ID Sequence pep WKFPDEEGA aff 0.0217 aff_rescale 0.0693 cle 0.1004 tap -0.3920 COMB 0.0648
53 ID Sequence pep KFPDEEGAC aff 0.0183 aff_rescale 0.0586 cle 0.0476 tap 0.2180 COMB 0.0766
54 ID Sequence pep FPDEEGACQ aff 0.0310 aff_rescale 0.0993 cle 0.1122 tap -0.5800 COMB 0.0872
55 ID Sequence pep PDEEGACQP aff 0.0187 aff_rescale 0.0599 cle 0.0360 tap -0.9320 COMB 0.0187
56 ID Sequence pep DEEGACQPC aff 0.0225 aff_rescale 0.0719 cle 0.0268 tap -0.7260 COMB 0.0396
57 ID Sequence pep EEGACQPCP aff 0.0179 aff_rescale 0.0573 cle 0.0246 tap -0.5370 COMB 0.0342
58 ID Sequence pep EGACQPCPI aff 0.0367 aff_rescale 0.1175 cle 0.1443 tap -0.0860 COMB 0.1349
59 ID Sequence pep GACQPCPIN aff 0.0164 aff_rescale 0.0526 cle 0.0336 tap -1.6000 COMB -0.0224
60 ID Sequence pep ACQPCPINC aff 0.0191 aff_rescale 0.0612 cle 0.0235 tap 0.1170 COMB 0.0705
61 ID Sequence pep CQPCPINCT aff 0.0202 aff_rescale 0.0648 cle 0.1787 tap -0.5320 COMB 0.0650
62 ID Sequence pep QPCPINCTH aff 0.0176 aff_rescale 0.0563 cle 0.9102 tap -0.8250 COMB 0.1516
63 ID Sequence pep PCPINCTHS aff 0.0149 aff_rescale 0.0477 cle 0.1806 tap -2.7690 COMB -0.0637
64 ID Sequence pep CPINCTHSC aff 0.0209 aff_rescale 0.0670 cle 0.0637 tap -0.4070 COMB 0.0563
65 ID Sequence pep PINCTHSCV aff 0.0201 aff_rescale 0.0643 cle 0.9611 tap -0.1380 COMB 0.2016
66 ID Sequence pep INCTHSCVD aff 0.0183 aff_rescale 0.0587 cle 0.0319 tap -2.0810 COMB -0.0406
67 ID Sequence pep NCTHSCVDL aff 0.0711 aff_rescale 0.2276 cle 0.5220 tap 0.9850 COMB 0.3552
68 ID Sequence pep CTHSCVDLD aff 0.0158 aff_rescale 0.0506 cle 0.0237 tap -1.7070 COMB -0.0312
69 ID Sequence pep THSCVDLDD aff 0.0262 aff_rescale 0.0838 cle 0.0626 tap -1.8400 COMB 0.0012
70 ID Sequence pep HSCVDLDDK aff 0.0176 aff_rescale 0.0562 cle 0.1675 tap 0.4330 COMB 0.1030
71 ID Sequence pep SCVDLDDKG aff 0.0156 aff_rescale 0.0499 cle 0.0337 tap -1.2670 COMB -0.0084
72 ID Sequence pep CVDLDDKGC aff 0.0172 aff_rescale 0.0552 cle 0.0279 tap -0.0100 COMB 0.0589
73 ID Sequence pep VDLDDKGCP aff 0.0166 aff_rescale 0.0531 cle 0.0368 tap -0.1300 COMB 0.0521
74 ID Sequence pep DLDDKGCPA aff 0.0241 aff_rescale 0.0770 cle 0.8155 tap -0.9610 COMB 0.1513
75 ID Sequence pep LDDKGCPAE aff 0.0207 aff_rescale 0.0664 cle 0.0997 tap -2.1840 COMB -0.0278
76 ID Sequence pep DDKGCPAEQ aff 0.0166 aff_rescale 0.0532 cle 0.3422 tap -0.6830 COMB 0.0704
77 ID Sequence pep DKGCPAEQR aff 0.0163 aff_rescale 0.0523 cle 0.4259 tap 0.9160 COMB 0.1620
78 ID Sequence pep KGCPAEQRA aff 0.0181 aff_rescale 0.0579 cle 0.2496 tap -0.8250 COMB 0.0540
79 ID Sequence pep GCPAEQRAS aff 0.0158 aff_rescale 0.0507 cle 0.0242 tap -2.3180 COMB -0.0615
80 ID Sequence pep CPAEQRASP aff 0.0199 aff_rescale 0.0638 cle 0.3231 tap -0.2540 COMB 0.0996
81 ID Sequence pep PAEQRASPL aff 0.0756 aff_rescale 0.2420 cle 0.9247 tap 0.3760 COMB 0.3995
82 ID Sequence pep AEQRASPLT aff 0.0256 aff_rescale 0.0820 cle 0.2007 tap -0.8740 COMB 0.0684
83 ID Sequence pep EQRASPLTG aff 0.0200 aff_rescale 0.0639 cle 0.1196 tap -1.3210 COMB 0.0158
84 ID Sequence pep QRASPLTGG aff 0.0190 aff_rescale 0.0609 cle 0.2416 tap -1.3260 COMB 0.0309
85 ID Sequence pep RASPLTGGG aff 0.0158 aff_rescale 0.0505 cle 0.0749 tap -1.1520 COMB 0.0042
86 ID Sequence pep ASPLTGGGS aff 0.0162 aff_rescale 0.0517 cle 0.0276 tap -1.9440 COMB -0.0413
87 ID Sequence pep SPLTGGGSG aff 0.0163 aff_rescale 0.0522 cle 0.4658 tap -1.4750 COMB 0.0483
88 ID Sequence pep PLTGGGSGG aff 0.0155 aff_rescale 0.0497 cle 0.0305 tap -1.8380 COMB -0.0376
89 ID Sequence pep LTGGGSGGG aff 0.0160 aff_rescale 0.0511 cle 0.0267 tap -1.7210 COMB -0.0309
90 ID Sequence pep TGGGSGGGS aff 0.0178 aff_rescale 0.0570 cle 0.0238 tap -2.6480 COMB -0.0718
91 ID Sequence pep GGGSGGGSI aff 0.0264 aff_rescale 0.0846 cle 0.0773 tap -0.0640 COMB 0.0930
92 ID Sequence pep GGSGGGSII aff 0.0449 aff_rescale 0.1438 cle 0.2937 tap 0.0550 COMB 0.1907
93 ID Sequence pep GSGGGSIIS aff 0.0229 aff_rescale 0.0733 cle 0.0470 tap -2.5770 COMB -0.0485
94 ID Sequence pep SGGGSIISA aff 0.0266 aff_rescale 0.0852 cle 0.0816 tap -0.9420 COMB 0.0504
95 ID Sequence pep GGGSIISAV aff 0.0268 aff_rescale 0.0857 cle 0.1279 tap -0.2400 COMB 0.0929
96 ID Sequence pep GGSIISAVV aff 0.0345 aff_rescale 0.1106 cle 0.4797 tap -0.1650 COMB 0.1743
97 ID Sequence pep GSIISAVVG aff 0.0177 aff_rescale 0.0566 cle 0.0237 tap -1.4950 COMB -0.0146
98 ID Sequence pep SIISAVVGI aff 0.0277 aff_rescale 0.0888 cle 0.1874 tap 0.7550 COMB 0.1546
99 ID Sequence pep IISAVVGIL aff 0.0787 aff_rescale 0.2518 cle 0.5148 tap 1.1560 COMB 0.3869
100 ID Sequence pep ISAVVGILL aff 0.1671 aff_rescale 0.5350 cle 0.2648 tap 1.0440 COMB 0.6269
101 ID Sequence pep SAVVGILLV aff 0.0406 aff_rescale 0.1301 cle 0.3325 tap 0.5070 COMB 0.2054
102 ID Sequence pep AVVGILLVV aff 0.0285 aff_rescale 0.0914 cle 0.7946 tap 0.7290 COMB 0.2470
103 ID Sequence pep VVGILLVVV aff 0.0232 aff_rescale 0.0742 cle 0.2172 tap 0.5060 COMB 0.1320
104 ID Sequence pep VGILLVVVL aff 0.0832 aff_rescale 0.2664 cle 0.3706 tap 0.8660 COMB 0.3653
105 ID Sequence pep GILLVVVLG aff 0.0159 aff_rescale 0.0507 cle 0.0384 tap -1.3810 COMB -0.0125
106 ID Sequence pep ILLVVVLGV aff 0.0248 aff_rescale 0.0793 cle 0.5281 tap 0.3450 COMB 0.1758
107 ID Sequence pep LLVVVLGVV aff 0.0213 aff_rescale 0.0681 cle 0.5579 tap 0.4250 COMB 0.1731
108 ID Sequence pep LVVVLGVVF aff 0.0358 aff_rescale 0.1145 cle 0.4182 tap 2.8030 COMB 0.3174
109 ID Sequence pep VVVLGVVFG aff 0.0159 aff_rescale 0.0507 cle 0.0557 tap -1.0690 COMB 0.0057
110 ID Sequence pep VVLGVVFGI aff 0.0251 aff_rescale 0.0804 cle 0.8816 tap 0.8000 COMB 0.2526
111 ID Sequence pep VLGVVFGIL aff 0.0586 aff_rescale 0.1877 cle 0.8738 tap 0.9200 COMB 0.3648
112 ID Sequence pep LGVVFGILI aff 0.0260 aff_rescale 0.0831 cle 0.5499 tap 0.3970 COMB 0.1855

[truncated: 4 more sheets: B44, B58, B62, TABLE]
